# Supplementary material for: ON/OFF metal-triggered molecular tweezers for fullerene recognition
Source: Royal Society of Chemistry journal article supplement (doi:10.1039/d1cc03451k), 2021-01-01
Supplement: d1cc03451k1.pdf [file d1cc03451k1.pdf]

# ON/OFF metal-triggered molecular tweezers for fullerene recognition

Adriana Sacristán-Martín,<sup>a†</sup> Héctor Barbero,<sup>a†</sup> Sergio Ferrero,<sup>a</sup> Daniel Miguel,<sup>a</sup> Raúl García-Rodríguez<sup>a\*</sup> and Celedonio M. Álvarez<sup>a\*</sup>

<sup>a</sup> GIR MIOMeT, IU CINQUIMA/Química Inorgánica, Facultad de Ciencias, Universidad de Valladolid, E47011, Valladolid, Spain. Email: raul.garcia.rodriguez@uva.es; celedonio.alvarez@uva.es

<sup>†</sup> These authors equally contributed to this work.

## Table of Contents

|                                                                             |    |
|-----------------------------------------------------------------------------|----|
| <i>Experimental Procedures</i> .....                                        | 2  |
| <i>General methods</i> .....                                                | 2  |
| <i>Synthesis overview</i> .....                                             | 3  |
| <i>Synthetic procedures</i> .....                                           | 4  |
| <i>Characterization details</i> .....                                       | 5  |
| <i>NMR and HR-MS spectra</i> .....                                          | 9  |
| <i>UV-Vis absorption and emission spectra</i> .....                         | 48 |
| <i>Cyclic voltammograms</i> .....                                           | 50 |
| <i>General procedure for in situ complexation and ligand cleavage</i> ..... | 50 |
| <i>Association constants measurements</i> .....                             | 59 |
| <i>Computational calculations details</i> .....                             | 64 |
| <i>References</i> .....                                                     | 69 |

## Experimental Procedures

### General methods

Reagents were purchased from regular suppliers and used without further purification. 1-Bromocorannulene was acquired from Synoi Chemicals (<http://synoichemicals.uva.es/>). Solvents were of analytical grade or spectrophotometric grade. They were either used as purchased or dried according to procedures described elsewhere.<sup>1,2</sup> Microwave reactions were carried out with an Anton Paar Monowave 300 Reactor using tightly capped flasks G10 and G4 (for volumes up to 10 mL and 4 mL, respectively) especially designed for the apparatus. All reactions under inert atmosphere (when needed) were performed with standard Schlenk techniques. They were also used as a preliminary step for degassing microwave flasks when inert atmosphere was necessary in microwave reactions. Column chromatography separations were carried out by using Silica gel 60 (particle size 0.040-0.063 mm; 230-400 mesh; Merck, Germany) as the stationary phase and TLCs were performed on precoated silica gel plates (0.25 mm thick, 60 F254, Merck, Germany) and observed under UV light. Purifications by centrifugation were performed in a Nahita 2600. NMR spectra were recorded on Agilent DD2 500 and Agilent MR 400 instruments. <sup>1</sup>H and <sup>13</sup>C NMR chemical shifts are reported in parts per million (ppm) and are referenced to TMS, using solvents as an internal reference. Coupling constants (*J*) are reported in hertz (Hz). Standard abbreviations used to indicate multiplicity: s = singlet, d = doublet, t = triplet, m = multiplet, dd = doublet of doublets. <sup>1</sup>H and <sup>13</sup>C assignments were performed by utilizing 2D NMR methods (COSY, DQCOSY, band selective ROESY, band selective HSQC, band selective HMBC, and gradient crisis HMBC). Some quaternary carbon atoms were not directly detected by 1D <sup>13</sup>C{<sup>1</sup>H} NMR experiment, but they were located thanks to HMBC correlations. Additionally, in the case of compound **L1b**, direct carbon detection was not possible due to the poor solubility of the sample. High resolution mass spectra were recorded at mass spectrometry service of the Laboratory of Instrumental Techniques of the University of Valladolid (L.T.I., [www.laboratoriotecnicasinstrumentales.es](http://www.laboratoriotecnicasinstrumentales.es)). A MALDI-TOF system (MALDI-TOF) Bruker Autoflex Speed (N<sub>2</sub> laser (337 nm, pulse energy 100 μJ, 1 ns), acceleration voltage 19 kV, reflector positive mode) was used. Trans-2-[3-(4-tert-butylphenyl)-2-methyl-2-propenylidene]malonitrile (DCTB) and 1,8-dihydroxy-9(10H)-anthracenone (dithranol) were used as matrixes. A UPLC-MS system (UPLC: Waters ACQUITY H-class UPLC; MS: Bruker Maxis Impact) by electrospray ionization (ESI positive and negative) was utilized as well. HRMS spectra were analyzed using Bruker DataAnalysis 4.1© ([www.bruker.com](http://www.bruker.com)). Steady state UV/Vis absorption spectroscopy was carried out on a Perkin Elmer Lambda 265 spectrophotometer, whereas emission spectroscopy was performed on a Perkin Elmer LS-55 fluorescence spectrophotometer, using quartz cuvettes with a path length of 1 cm in dichloromethane as the solvent. Cyclic voltammetry was carried out using a PalmSens4 potentiostat, with a 0.1 M solution of tetrabutylammonium hexafluorophosphate (NBu<sub>4</sub>PF<sub>6</sub>) as the supporting electrolyte in dry dichloromethane as the solvent. Solutions were deaerated with a nitrogen stream prior to each measurement. Experiments were performed in a one-compartment cell equipped with a glassy carbon electrode, a silver wire counter electrode, and an Ag/AgCl wire as pseudo-reference electrode. All potentials were referenced against the ferrocene/ferrocenium couple (Fc/Fc<sup>+</sup>) after each experiment.

## Synthesis overview

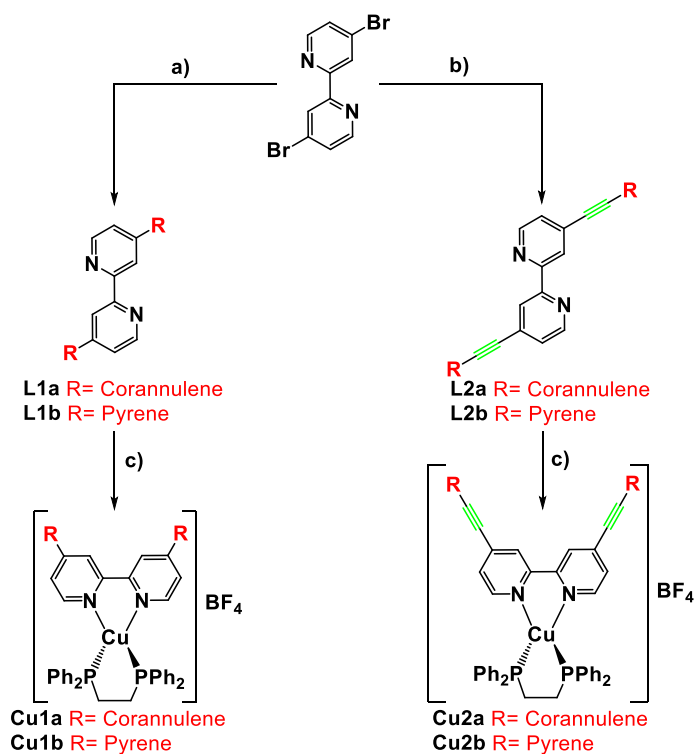

**Scheme S 1.** Synthesis routes to achieve ligands **L1a,b** and **L2a,b** as well as Copper complexes **Cu1a,b** and **Cu2a,b** functionalized with polycyclic aromatic hydrocarbons (PAH). Reagents and conditions: (a) Bpin-PAH,  $[\text{PdCl}_2(\text{dppf})]$ ,  $^t\text{BuONa}$ , toluene, MW, 130 °C; (b) PAH-acetylene-TMS,  $[\text{PdCl}_2(\text{dppf})]$ , TBAF in THF (1M); (c)  $[\text{Cu}(\text{NCMe})_4]\text{BF}_4$ , dppf, DCM.

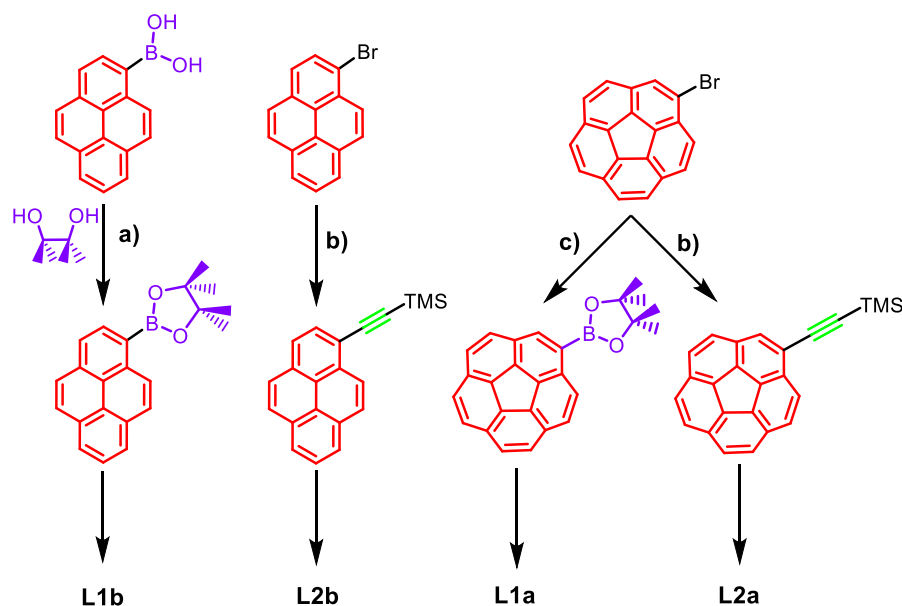

**Scheme S 2.** Synthesis of PAH intermediates prior to **L1a,b** and **L2a,b** preparation. Reagents and Conditions: a) Pinacol, MW, 150 °C; b) ethynyltrimethylsilane, [PdCl<sub>2</sub>(dppf)], CuCl, NEt<sub>3</sub>, MW, 85 °C; c) B<sub>2</sub>(pin)<sub>2</sub>, [PdCl<sub>2</sub>(dppf)], KOAc, dioxane, MW, 130 °C.

## Synthetic procedures

### Preparation of pyrene-1-boronic acid pinacol ester

Pyrene-1-boronic acid (0.1 g, 0.38 mmol) and pinacol (70 mg, 0.58 mmol) were mixed in a microwave flask. The mixture was irradiated in the absence of solvent in a microwave reactor at 150 °C for 15 min without stirring allowing pinacol to melt and, then, stirred at 600 rpm (pressure never increased throughout the whole process). Formed water droplets at the top of the vial were gently removed. Resulting light brown crude was collected and used in the next step without further purification. (0.11 g, 87% yield) The spectral data were in agreement with those reported in the literature.<sup>3</sup>

### Preparation of corannulene-1-boronic acid pinacol ester

1-Bromocorannulene (50 mg, 0.15 mmol), bis(pinacolato)diboron (58 mg, 0.23 mmol), [PdCl<sub>2</sub>(dppf)] (5.2 mg, 7 μmol) and potassium carbonate (46 mg, 0.46 mmol) were mixed in a microwave flask under inert atmosphere. Dry dioxane (2.0 mL) was added and the mixture was degassed. It was then irradiated in a microwave reactor at 130 °C for 75 min with stirring at 600 rpm (maximum pressure reached was 6.0 bar). Solvent was removed under vacuum before a purification by column chromatography on silica gel (9:1 to 7:3 hexane/CH<sub>2</sub>Cl<sub>2</sub>) to give the expected compound as a light brown solid (40 mg, 70% yield). The spectral data were in agreement with those reported in the literature.<sup>4</sup>

### General method for trimethylsilylacetylene arene preparation

Bromoarene (0.30 mmol), ethynyltrimethylsilane (0.21 mL, 1.5 mmol), [PdCl<sub>2</sub>(dppf)] (22 mg, 0.030 mmol) CuCl (3.0 mg, 0.030 mmol) and NEt<sub>3</sub> (3.0 mL, 21.5 mmol) were mixed in a microwave flask. Then, the mixture was irradiated in a microwave reactor at 85 °C for 60 min with stirring at 600 rpm (maximum pressure reached was 2.0 bar). After finishing, solvent was removed under vacuum and the resulting crude was subjected to purification by column chromatography on silica gel (hexane) to give the expected compound as a yellowish solid (76 mg, 85% yield and 73 mg, 70% yield for pyrene and corannulene derivatives, respectively). The spectral data were in agreement with those reported in the literature.<sup>5</sup>

### General method for Suzuki coupling (compounds **L1a** and **L1b**)

4,4'-dibromo-2,2'-bipyridine (20 mg, 64 μmol), arene boronate ester (0.14 mmol) [PdCl<sub>2</sub>(dppf)] (19 mg, 25 μmol), and <sup>t</sup>BuONa (37 mg, 0.38 mmol) were mixed in a microwave flask under inert atmosphere. Dry and degassed toluene (3.0 mL) was then added. The solution was irradiated in a microwave reactor at 130 °C for 90 minutes with stirring at 700 rpm (maximum pressure reached was 4.8 bar). The solvent was removed under vacuum before

subjecting the remaining material to purification by carrying out washes with ethanol (3 x 10 mL) followed by centrifugations at 3500 rpm. Undesired liquid was decanted, and the solid was collected and dried in an oven at 80 °C to furnish the expected compounds as grey solids (35 mg, quantitative yield and 41 mg, quantitative yield for **L1a** and **L1b**, respectively).

#### General method for Sonogashira coupling (compounds **L2a** and **L2b**)

4,4'-dibromo-2,2'-bipyridine (20 mg, 64  $\mu\text{mol}$ ), trimethylsilylethynylarene (0.14 mmol),  $[\text{PdCl}_2(\text{dppf})]$  (2.8 mg, 3.8  $\mu\text{mol}$ ), and TBAF 1M in THF 0.38 mL, 0.38 mmol) were mixed in a Schlenk flask under inert atmosphere. The mixture was heated at 70°C for 1 hour. Then the solvent was removed in vacuo and the crude was purified by washes with ethanol (2 x 10 mL) followed by centrifugations at 3500 rpm. Undesired liquid was decanted, and the solid was collected and dried in an oven at 80 °C, giving rise to expected compounds as brown solids (35 mg, 90% yield and 40.5 mg, 90% yield for **L2a** and **L2b**, respectively).

#### General method for complexes preparation

##### **Cu1a/Cu1b**

To a colorless solution of  $[\text{Cu}(\text{NCMe})_4]\text{BF}_4$  (10 mg, 32  $\mu\text{mol}$ ) in dry DCM (10 mL) kept in a Schlenk under inert atmosphere, bipyridine **L1a/L1b** (32  $\mu\text{mol}$ ) was added. The solution was stirred at room temperature for 10 minutes before adding dppe (13 mg, 32  $\mu\text{mol}$ ). The mixture immediately became yellow and was further stirred at room temperature for 10 min. It was then filtered under nitrogen atmosphere, concentrated and precipitated with hexane. A yellow solid crushed out and was isolated by solvent removal under vacuum. (23 mg, 65% yield and 23 mg, 60% yield for **Cu1a** and **Cu1b**, respectively).

##### **Cu2a/Cu2b**

To a colorless solution of  $[\text{Cu}(\text{NCMe})_4]\text{BF}_4$  (10 mg, 32  $\mu\text{mol}$ ) in dry DCM (10 mL) kept in a Schlenk under inert atmosphere, bipyridine **L2a/L2b** (32  $\mu\text{mol}$ ) was added. The solution was stirred at room temperature for 10 minutes before adding dppe (13 mg, 32  $\mu\text{mol}$ ). The mixture immediately became green and turned to a dark red color after further stirring at room temperature for 15 min. It was then filtered under nitrogen atmosphere, concentrated and precipitated with hexane. A dark orange solid crushed out and was isolated by solvent removal under vacuum. (24 mg, 65% yield and 24 mg, 60% yield for **Cu2a** and **Cu2b**, respectively).

## Characterization details

### L1a

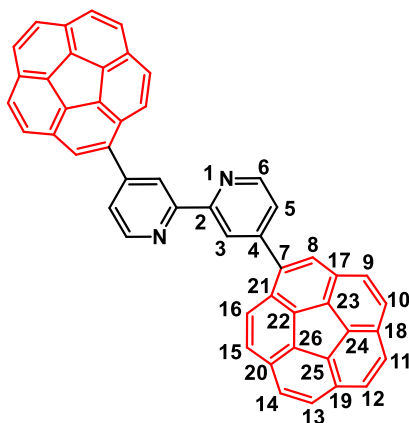

$^1\text{H}$  NMR (500 MHz,  $\text{CDCl}_3$ )  $\delta$  8.96 (d,  $J = 1.7$  Hz, 2H,  $\text{H}_3$ ), 8.88 (d,  $J = 4.9$  Hz, 2H,  $\text{H}_6$ ), 8.12 (s, 2H,  $\text{H}_8$ ), 7.94 - 7.88 (m, 6H,  $\text{H}_9$ ,  $\text{H}_{11}$  and  $\text{H}_{13}$ ), 7.88 - 7.85 (m, 6H,  $\text{H}_{15}$ ,  $\text{H}_{12}$  and  $\text{H}_{14}$ ), 7.83 - 7.81 (m, 4H,  $\text{H}_{10}$  and  $\text{H}_{16}$ ), 7.80 (d,  $J = 4.9$ , 1.7 Hz, 2H,  $\text{H}_5$ ).  $^{13}\text{C}$  NMR (126 MHz,  $\text{CDCl}_3$ )  $\delta$  149.6 ( $\text{C}_6$ ), 148.4 ( $\text{C}_4$ ), 139.5 ( $\text{C}_7$ ), 131.2 - 130.8 ( $\text{C}_q$  CORA), 130.5 ( $\text{C}_q$  CORA), 128.9–128.4 ( $\text{C}_q$  CORA), 127.9 ( $\text{C}_{16}$ ), 127.6 – 127.0 ( $\text{CH}_{\text{CORA}}$  and  $\text{C}_q$  CORA), 127.0 ( $\text{C}_8$  and  $\text{C}_{10}$ ), 126.4 ( $\text{C}_9$ ), 124.9 ( $\text{C}_5$ ), 122.1 ( $\text{C}_3$ ). HRMS (MALDI):  $m/z = 653.1989$  [ $\text{M}+\text{H}$ ] $^+$  calculated 653.2012 for  $\text{C}_{50}\text{H}_{25}\text{N}_2$ .

### L2a

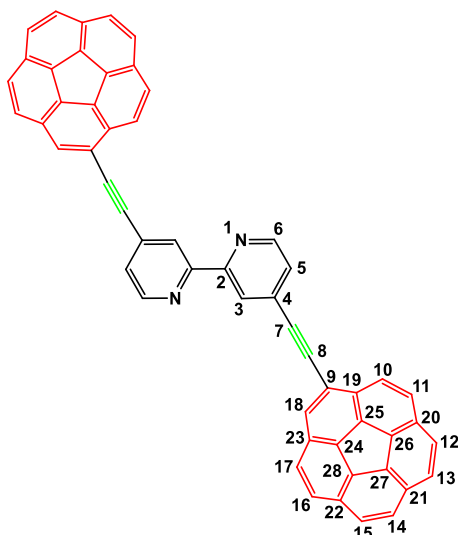

$^1\text{H}$  NMR (500 MHz, methylene chloride- $d_2$ )  $\delta$  8.79 (dd,  $J = 5.0, 0.7$  Hz, 2H,  $\text{H}_6$ ), 8.76 (dd,  $J = 1.5, 0.7$  Hz, 2H,  $\text{H}_3$ ), 8.22 (d,  $J = 8.9$  Hz, 2H,  $\text{H}_{10}$ ), 8.21 (s, 2H,  $\text{H}_{18}$ ), 7.98 (d,  $J = 8.9$  Hz, 2H,  $\text{H}_{11}$ ), 7.92 – 7.84 (m, 12H,  $\text{H}_{12}, \text{H}_{13}, \text{H}_{14}, \text{H}_{15}, \text{H}_{16}$  and  $\text{H}_{17}$ ), 7.63 (dd,  $J = 5.0, 1.5$  Hz, 2H,  $\text{H}_5$ ).  $^{13}\text{C}$  NMR (126 MHz, methylene chloride- $d_2$ )  $\delta$  155.8 ( $\text{C}_2$ ), 149.4 ( $\text{C}_6$ ), 136.0 ( $\text{C}_q$ ), 135.7 ( $\text{C}_q$ ), 135.1 ( $\text{C}_9$ ), 132.3 ( $\text{C}_{18}$  and  $\text{C}_4$ ), 131.6 ( $\text{C}_q$ ), 131.4 ( $\text{C}_q$ ), 130.8 ( $\text{C}_q$ ), 130.2 ( $\text{C}_q$ ), 127.9 ( $\text{C}_{11}$ ), 127.7 ( $\text{C}_{17}$ ), 127.6 ( $\text{CH}_{\text{COR A}}$ ), 127.5 ( $\text{CH}_{\text{COR A}}$ ), 127.2 ( $\text{CH}_{\text{COR A}}$ ), 126.7 ( $\text{CH}_{\text{COR A}}$ ), 125.8 ( $\text{C}_{10}$ ), 125.7 ( $\text{C}_5$ ), 123.0 ( $\text{C}_3$ ), 92.0 ( $\text{C}_8$ ), 90.6 ( $\text{C}_7$ ) ( HRMS (MALDI):  $m/z = 701.1963$  [ $\text{M}+\text{H}$ ] $^+$  (calculated 701.2012 for  $\text{C}_{54}\text{H}_{25}\text{N}_2$ ).

#### L1b

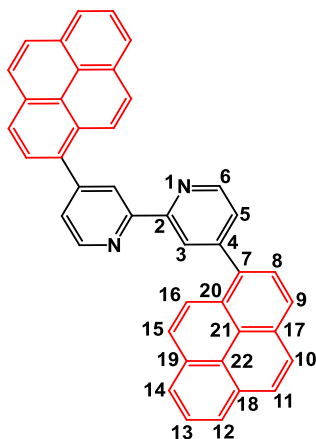

$^1\text{H}$  NMR (500 MHz,  $\text{CDCl}_3$ )  $\delta$  8.86 (d,  $J = 6.4$  Hz, 2H,  $\text{H}_6$ ), 8.85 (d,  $J = 1.8$  Hz, 2H,  $\text{H}_3$ ), 8.30 (d,  $J = 7.8$  Hz, 2H,  $\text{H}_9$ ), 8.26 (d,  $J = 7.6$  Hz, 2H,  $\text{H}_{12}$ ), 8.23 (d,  $J = 9.3$  Hz, 2H,  $\text{H}_{16}$ ), 8.22 (d,  $J = 7.6$  Hz, 2H,  $\text{H}_{14}$ ), 8.17 (d,  $J = 10.8$  Hz, 2H,  $\text{H}_{11}$ ), 8.15 (d,  $J = 10.8$  Hz, 2H,  $\text{H}_{10}$ ), 8.12 (d,  $J = 9.3$  Hz, 2H,  $\text{H}_{15}$ ), 8.10 (d,  $J = 7.8$  Hz, 2H,  $\text{H}_8$ ), 8.06 (t,  $J = 7.6$  Hz, 2H,  $\text{H}_{13}$ ), 7.64 (dd,  $J = 6.4, 1.8$  Hz, 2H,  $\text{H}_5$ ).  $^{13}\text{C}$  NMR (Indirect detection by HMBC)  $\delta$  156.4 ( $\text{C}_2$ ), 150.2 ( $\text{C}_4$ ), 149.3 ( $\text{C}_6$ ), 134.8 ( $\text{C}_7$ ), 131.4 ( $\text{C}_{22}$ ), 130.9 ( $\text{C}_{18}$ ), 130.8 ( $\text{C}_{19}$ ), 128.3 ( $\text{C}_{21}$  and  $\text{C}_{17}$ ), 128.2 ( $\text{C}_{15}$ ), 128.0 ( $\text{C}_{11}$ ), 127.4 ( $\text{C}_{10}$ ), 127.2 ( $\text{C}_8$ ), 126.2 ( $\text{C}_{13}$ ), 125.7 ( $\text{C}_5$ ), 125.6 ( $\text{C}_{12}$ ), 125.2 ( $\text{C}_{14}$ ), 124.8 ( $\text{C}_9$  and  $\text{C}_{20}$ ), 124.5 ( $\text{C}_{16}$ ), 123.1 ( $\text{C}_3$ ). HRMS (MALDI):  $m/z = 557.2033$  [ $\text{M}+\text{H}$ ] $^+$  (calculated 557.2012 for  $\text{C}_{42}\text{H}_{25}\text{N}_2$ ).

#### L2b

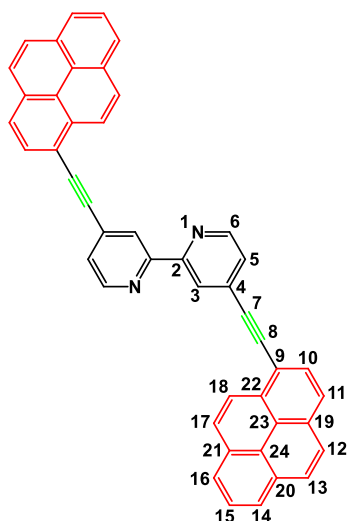

$^1\text{H}$  NMR (500 MHz,  $\text{CDCl}_3$ )  $\delta$  8.82 (dd,  $J = 4.9, 0.8$  Hz, 2H,  $\text{H}_6$ ), 8.77 (dd,  $J = 1.6, 0.8$  Hz, 2H,  $\text{H}_3$ ), 8.71 (d,  $J = 9.1$  Hz, 2H,  $\text{H}_{18}$ ), 8.29 (d,  $J = 7.6$  Hz, 2H,  $\text{H}_{16}$ ), 8.27 (m, 4H,  $\text{H}_{10}$  and  $\text{H}_{17}$ ), 8.25 (d,  $J = 7.6$  Hz, 2H,  $\text{H}_{14}$ ), 8.19 (d,  $J = 8.0$  Hz, 2H,  $\text{H}_{11}$ ), 8.16 (d,  $J = 9.0$  Hz, 2H,  $\text{H}_{13}$ ), 8.10 (d,  $J = 9.0$  Hz, 2H,  $\text{H}_{12}$ ), 8.07 (t,  $J = 7.6$  Hz, 2H,  $\text{H}_{15}$ ), 7.64 (dd,  $J = 4.9, 1.6$  Hz, 2H,  $\text{H}_5$ ).  $^{13}\text{C}$  NMR (126 MHz,  $\text{CDCl}_3$ )  $\delta$  155.9 ( $\text{C}_2$ ), 149.4 ( $\text{C}_6$ ), 132.8 ( $\text{C}_4$ ), 132.3 ( $\text{C}_{22}$ ), 132.0 ( $\text{C}_{19}$ ), 131.2 ( $\text{C}_{20}$ ), 131.0 ( $\text{C}_{21}$ ), 130.0 ( $\text{C}_{10}$ ), 128.8 ( $\text{C}_{17}$ ), 128.7 ( $\text{C}_{13}$ ), 127.2 ( $\text{C}_{12}$ ), 126.4 ( $\text{C}_{15}$ ), 123.0 ( $\text{C}_{16}$ ), 125.9 ( $\text{C}_{14}$ ), 125.7 ( $\text{C}_5$ ), 125.4 ( $\text{C}_{18}$ ), 124.6 ( $\text{C}_{11}$ ), 124.5 ( $\text{C}_{23}$ ), 124.3 ( $\text{C}_{24}$ ), 123.2 ( $\text{C}_3$ ), 116.5 ( $\text{C}_9$ ), 93.5 ( $\text{C}_8$ ), 92.6 ( $\text{C}_7$ ). HRMS (MALDI):  $m/z = 605.2020$  [ $\text{M}+\text{H}$ ] $^+$  (calculated 605.2012 for  $\text{C}_{46}\text{H}_{25}\text{N}_2$ ).

### Cu1a

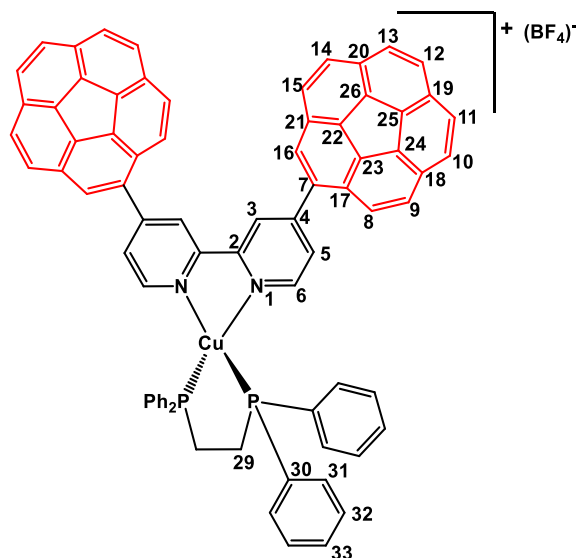

$^1\text{H}$  NMR (500 MHz, methylene chloride- $d_2$ )  $\delta$  8.89 (s, 2H,  $\text{H}_3$ ), 8.61 (d,  $J = 5.4$  Hz, 2H,  $\text{H}_6$ ), 8.18 (s, 2H,  $\text{H}_{16}$ ), 7.99 (dd,  $J = 5.4, 2$  Hz,  $\text{H}_5$ ), 7.96 (d,  $J = 9.0$  Hz, 2H,  $\text{H}_{15}$ ), 7.94 (d,  $J = 9.0$  Hz, 2H,  $\text{H}_{14}$ ), 7.93 – 7.89 (m, 6H,  $\text{H}_{10}$ ,  $\text{H}_{13}$  and  $\text{H}_{11}$  or  $\text{H}_{12}$ ), 7.88 (d,  $J = 8.9$  Hz, 2H,  $\text{H}_9$ ), 7.85 (d,  $J = 8.7$  Hz, 2H,  $\text{H}_{11}$  or  $\text{H}_{12}$ ), 7.81 (d,  $J = 8.9$  Hz, 2H,  $\text{H}_8$ ), 7.56 – 7.42 (m, 10H,  $\text{H}_{31}$ ,  $\text{H}_{32}$  and  $\text{H}_{33}$ ), 2.77 (t,  $J = 6.0$  Hz, 4H,  $\text{H}_{29}$ ).  $^{13}\text{C}$  NMR (126 MHz, methylene chloride- $d_2$ )  $\delta$  152.6 ( $\text{C}_2$ ), 150.5 ( $\text{C}_4$ ), 150.2 ( $\text{C}_6$ ), 136.7 ( $\text{C}_7$ ), 136.2 ( $\text{C}_q$ ), 136.2 ( $\text{C}_q$ ), 135.7 ( $\text{C}_q$ ), 132.3 ( $\text{C}_{\text{Ph}}$ ), 132.1 ( $\text{C}_{\text{Ph}}$ ), 131.6 ( $\text{C}_q$ ), 131.1 ( $\text{C}_q$ ), 130.8 ( $\text{C}_{\text{Ph}}$ ), 130.2 ( $\text{C}_q$ ), 129.4 ( $\text{C}_{\text{Ph}}$ ), 128.4 ( $\text{C}_9$ ), 128.0 ( $\text{C}_{14}$ ), 127.9 ( $\text{C}_{16}$ ,  $\text{C}_{11}$  or  $\text{C}_{12}$ ), 127.8 ( $\text{C}_{10}$  or  $\text{C}_{13}$ ), 127.7 ( $\text{C}_q$ ), 127.5 ( $\text{C}_{10}$  or  $\text{C}_{13}$ ), 127.0 ( $\text{C}_{11}$  or  $\text{C}_{12}$ ), 126.93 ( $\text{C}_5$ ), 126.9 ( $\text{C}_{15}$ ), 125.2 ( $\text{C}_8$ ), 123.1 ( $\text{C}_3$ ), 25.8 ( $\text{C}_{29}$ ). HRMS (MALDI):  $m/z = 1113.2556$  [ $\text{M}$ ] $^+$  (calculated 1113.2583 for  $\text{C}_{76}\text{H}_{48}\text{CuN}_2\text{P}_2$ ).

**Cu2a**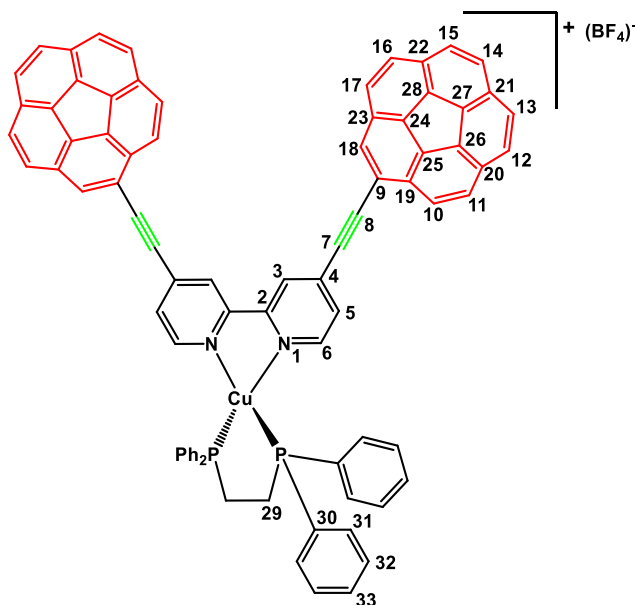

$^1\text{H}$  NMR (500 MHz, methylene chloride- $d_2$ )  $\delta$  8.71 (d,  $J = 1.3$  Hz, 2H,  $\text{H}_3$ ), 8.44 (d,  $J = 5.4$  Hz, 2H,  $\text{H}_6$ ), 8.31 (s, 2H,  $\text{H}_{18}$ ), 8.22 (d,  $J = 8.8$  Hz, 2H,  $\text{H}_{10}$ ), 8.03 (d,  $J = 8.8$  Hz, 2H,  $\text{H}_{11}$ ), 7.96 – 7.87 (m, 20H,  $\text{H}_{12}$ ,  $\text{H}_{13}$ ,  $\text{H}_{14}$ ,  $\text{H}_{15}$ ,  $\text{H}_{16}$  and  $\text{H}_{17}$ ), 7.78 (dd,  $J = 5.4$ , 1.3 Hz, 2H,  $\text{H}_5$ ), 7.51 – 7.38 (m, 20H,  $\text{H}_{31}$ ,  $\text{H}_{32}$  and  $\text{H}_{33}$ ), 2.74 (t,  $J = 5.8$  Hz, 4H,  $\text{H}_{29}$ ).  $^{13}\text{C}$  NMR (126 MHz, methylene chloride- $d_2$ )  $\delta$  153.7 ( $\text{C}_2$ ), 151.8 ( $\text{C}_6$ ), 138.0 ( $\text{C}_q$ ), 137.7 ( $\text{C}_q$ ), 137.0 ( $\text{C}_q$ ), 136.3 ( $\text{C}_q$ ), 135.2 ( $\text{C}_9$ ), 134.4 ( $\text{C}_4$ ), 134.1 ( $\text{C}_q$ ), 133.8 ( $\text{C}_q$ ), 133.4 ( $\text{C}_{18}$ ), 133.2 ( $\text{C}_q$ ), 132.7 ( $\text{C}_{\text{Ph}}$ ), 131.4 ( $\text{C}_q$ ), 132.0 ( $\text{C}_q$ ), 132.0 ( $\text{C}_q$ ), 131.3 ( $\text{C}_{31}$ ), 130.1 ( $\text{C}_{11}$ ), 130.0 ( $\text{CH}_{\text{cora}}$ ), 129.9 ( $\text{CH}_{\text{cora}}$ ,  $\text{C}_5$ ), 129.8 ( $\text{CH}_{\text{cora}}$ ,  $\text{C}_4$ ), 129.3 ( $\text{CH}_{\text{cora}}$ ), 129.2 ( $\text{CH}_{\text{cora}}$ ,  $\text{C}_{12}$ ), 128.6 ( $\text{C}_{17}$ ), 127.2 ( $\text{C}_{10}$ ), 126.3 ( $\text{C}_3$ ), 98.3 ( $\text{C}_8$ ), 91.0 ( $\text{C}_7$ ). HRMS (MALDI):  $m/z = 1161.2554$  [ $\text{M}$ ] $^+$  (calculated 1161.2583 for  $\text{C}_{80}\text{H}_{48}\text{CuN}_2\text{P}_2$ ).

**Cu1b**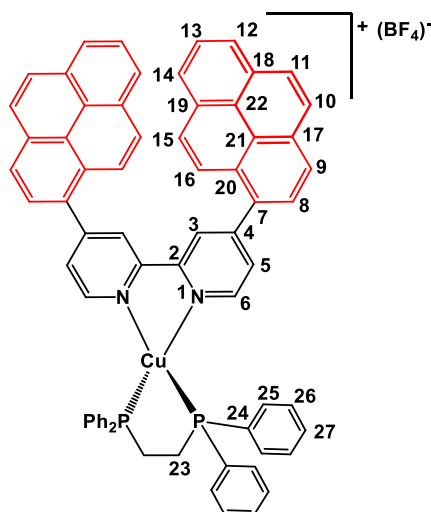

$^1\text{H}$  NMR (500 MHz, methylene chloride- $d_2$ )  $\delta$  8.73 (d,  $J = 1.5$  Hz, 2H,  $\text{H}_3$ ), 8.63 (d,  $J = 5.3$  Hz, 2H,  $\text{H}_6$ ), 8.34 (d,  $J = 8.0$  Hz, 2H,  $\text{H}_9$ ), 8.31 (d,  $J = 7.7$  Hz, 2H,  $\text{H}_{12}$ ), 8.26 (d,  $J = 7.7$  Hz, 2H,  $\text{H}_{14}$ ), 8.22 (d,  $J = 9.0$  Hz, 2H,  $\text{H}_{11}$ ), 8.19 – 8.15, (m, 6H,  $\text{H}_{10}$ ,  $\text{H}_{15}$  and  $\text{H}_{16}$ ), 8.13 – 8.07 (m, 4H,  $\text{H}_8$  and  $\text{H}_{13}$ ), 7.87 (dd,  $J = 5.3$ , 1.5 Hz, 2H,  $\text{H}_5$ ), 7.59 – 7.46 (m, 20H,  $\text{H}_{25}$ ,  $\text{H}_{26}$  and  $\text{H}_{27}$ ), 2.78 (t,  $J = 6.0$  Hz, 4H,  $\text{H}_{23}$ ).  $^{13}\text{C}$  NMR (126 MHz, methylene chloride- $d_2$ )  $\delta$  152.4 ( $\text{C}_2$ ), 152.3 ( $\text{C}_4$ ), 149.9 ( $\text{C}_6$ ), 132.3 ( $\text{C}_{25}$ ), 132.2 ( $\text{C}_7$ ), 132.17 ( $\text{C}_{24}$ ), 131.4 ( $\text{C}_q$ ), 130.8 ( $\text{C}_{27}$ ), 130.6 ( $\text{C}_{19}$  or  $\text{C}_{20}$ ), 130.5 ( $\text{C}_q$ ), 129.4 ( $\text{C}_{26}$ ), 129.0 ( $\text{C}_{15}$ ), 128.8 ( $\text{C}_{11}$ ), 128.1 ( $\text{C}_{19}$  or  $\text{C}_{20}$ ), 127.9 ( $\text{C}_5$ ), 127.2 ( $\text{C}_{10}$ ), 126.9 ( $\text{C}_8$ ), 126.7 ( $\text{C}_{13}$ ), 126.3 ( $\text{C}_{12}$ ), 125.7 ( $\text{C}_{14}$ ), 125.0 ( $\text{C}_9$ ), 124.9 ( $\text{C}_{21}$ ), 124.4 ( $\text{C}_{22}$  and  $\text{C}_{18}$ ), 124.2 ( $\text{C}_3$ ), 123.2 ( $\text{C}_{16}$ ), 25.5 ( $\text{C}_{23}$ ). HRMS (MALDI):  $m/z = 1017.2566$  [ $\text{M}$ ] $^+$  (calculated 1017.2583 for  $\text{C}_{68}\text{H}_{48}\text{CuN}_2\text{P}_2$ ).



**Cu2b**

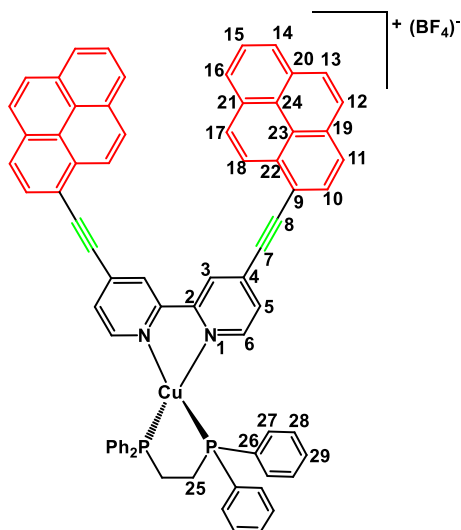

<sup>1</sup>H NMR (500 MHz, methylene chloride-*d*<sub>2</sub>) δ 8.78 (s, 1H, H<sub>3</sub>), 8.76 (s, 1H, H<sub>18</sub>), 8.46 (d, *J* = 5.3 Hz, 2H, H<sub>6</sub>), 8.39 – 8.32 (m, 8H, H<sub>10</sub>, H<sub>17</sub>, H<sub>16</sub> and H<sub>14</sub>), 8.28 (d, *J* = 8.0 Hz, 2H, H<sub>11</sub>), 8.25 (d, *J* = 8.9 Hz, 2H, H<sub>13</sub>), 8.17 (d, *J* = 8.9 Hz, 2H, H<sub>12</sub>), 8.14 (t, *J* = 7.6 Hz, 2H, H<sub>15</sub>), 7.82 (d, *J* = 5.3 Hz, 2H, H<sub>5</sub>), 7.53 – 7.37 (m, 20H, H<sub>27</sub>, H<sub>28</sub> and H<sub>29</sub>), 2.74 (t, *J* = 5.8 Hz, 4H, H<sub>25</sub>). <sup>13</sup>C NMR (101 MHz, methylene chloride-*d*<sub>2</sub>) δ 151.8 (C<sub>2</sub>), 149.9 (C<sub>6</sub>), 134.6 (C<sub>4</sub>), 132.6 (C<sub>24</sub>), 132.1 (C<sub>27</sub>), 131.8 (C<sub>26</sub>), 131.2 (C<sub>20</sub>), 130.8 (C<sub>21</sub>), 130.77 (C<sub>29</sub>), 130.2 (C<sub>10</sub>), 129.4 (C<sub>13</sub>), 129.35 (C<sub>28</sub>), 129.3 (C<sub>17</sub>), 127.7 (C<sub>3</sub>), 127.2 (C<sub>12</sub>), 126.7 (C<sub>15</sub>), 126.5 (C<sub>14</sub>), 126.4 (C<sub>16</sub>), 124.8 (C<sub>11</sub>), 124.4 (C<sub>18</sub>), 124.3 (C<sub>23</sub>), 124.2 (C<sub>5</sub>), 124.0 (C<sub>19</sub> and C<sub>22</sub>), 115.2 (C<sub>9</sub>), 97.5 (C<sub>8</sub>), 91.3 (C<sub>7</sub>), 25.4 (C<sub>25</sub>). HRMS (MALDI): *m/z* = 1065.2574 [M]<sup>+</sup> (calculated 1065.2583 for C<sub>72</sub>H<sub>48</sub>CuN<sub>2</sub>P<sub>2</sub>).

**NMR and HR-MS spectra**

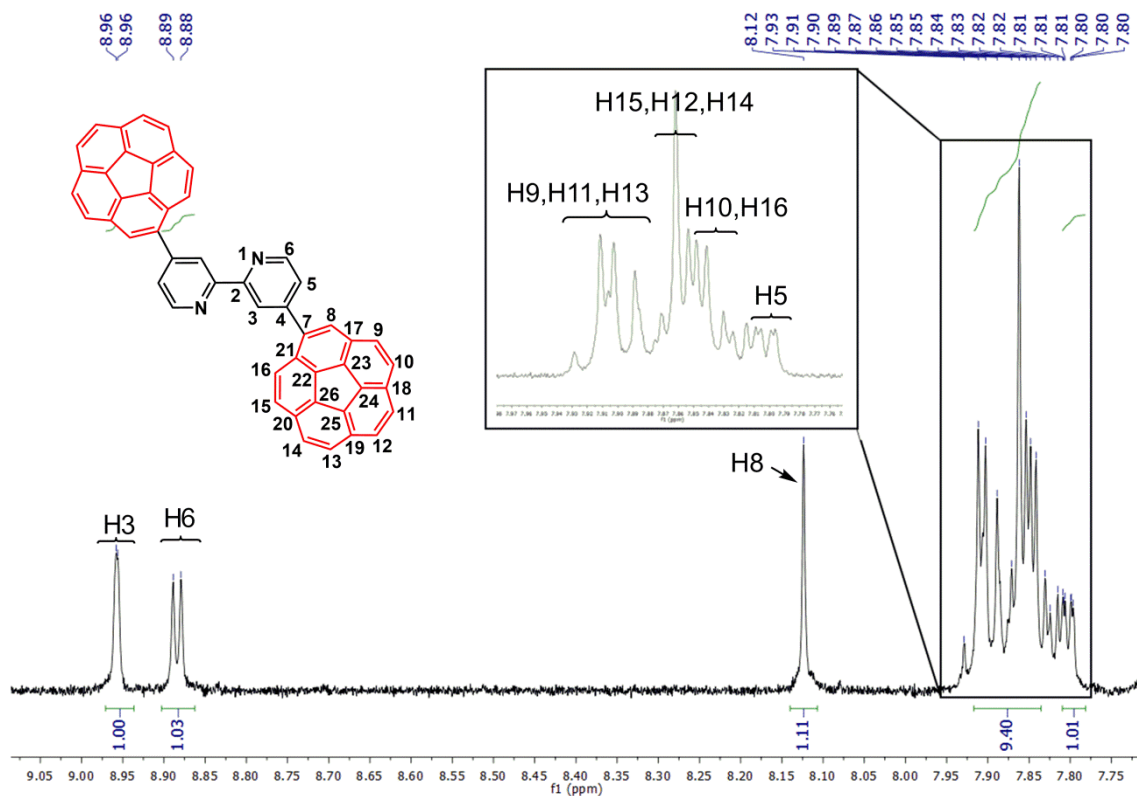

Figure S 1.  $^1\text{H-NMR}$  (500 MHz,  $\text{CDCl}_3$ ) spectrum of compound L1a.

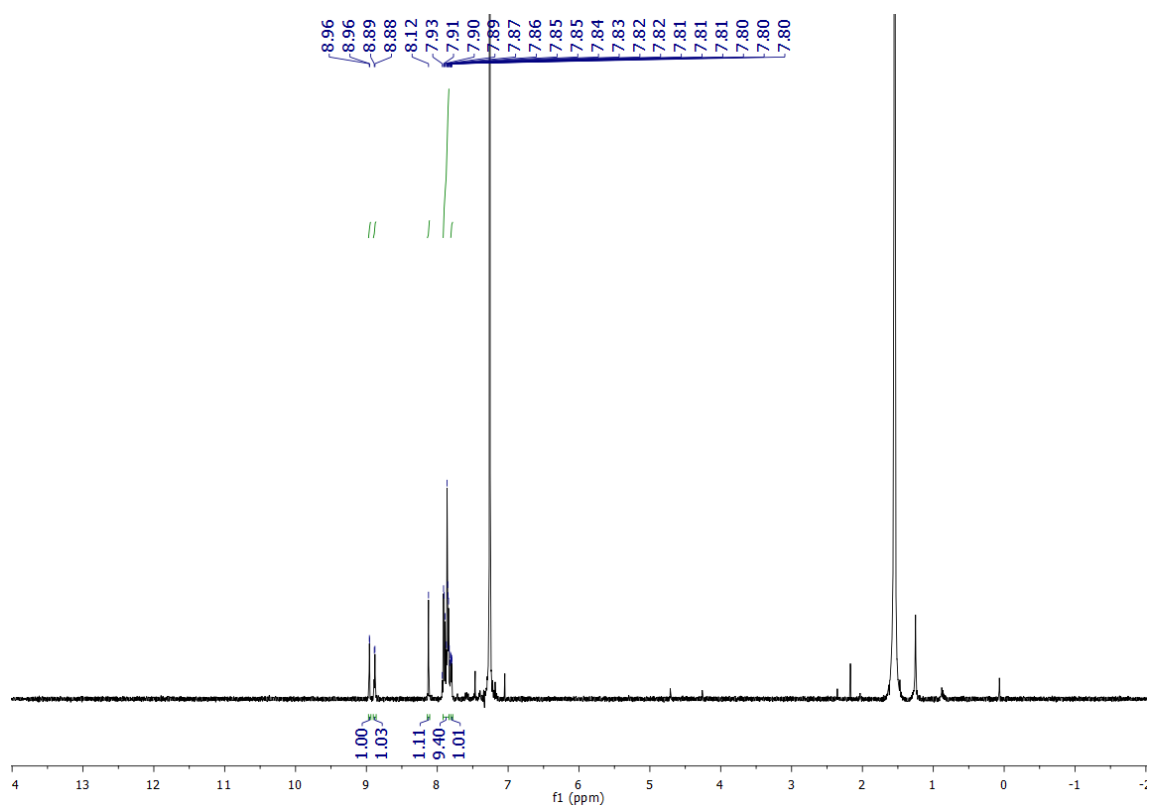

Figure S 2. Full  $^1\text{H-NMR}$  (500 MHz,  $\text{CDCl}_3$ ) spectrum of compound L1a.

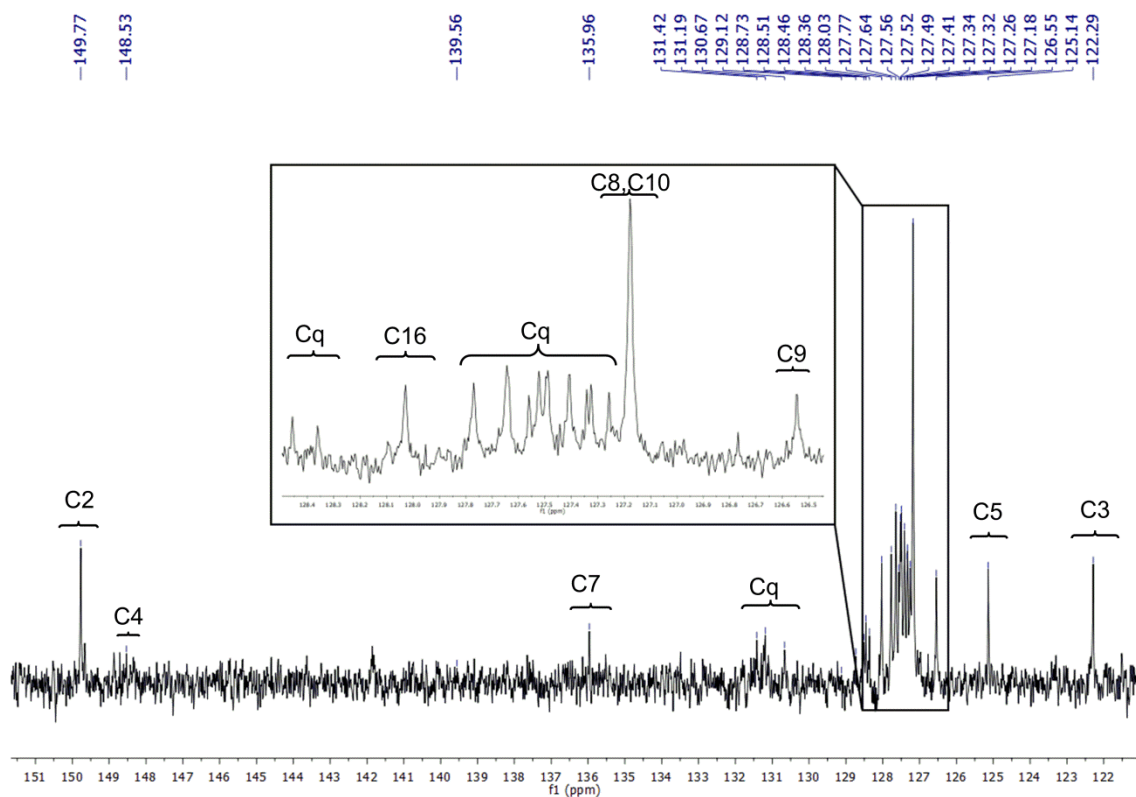

Figure S 3.  $^{13}\text{C}\{^1\text{H}\}$ -NMR (126 MHz,  $\text{CDCl}_3$ ) spectrum of compound L1a.

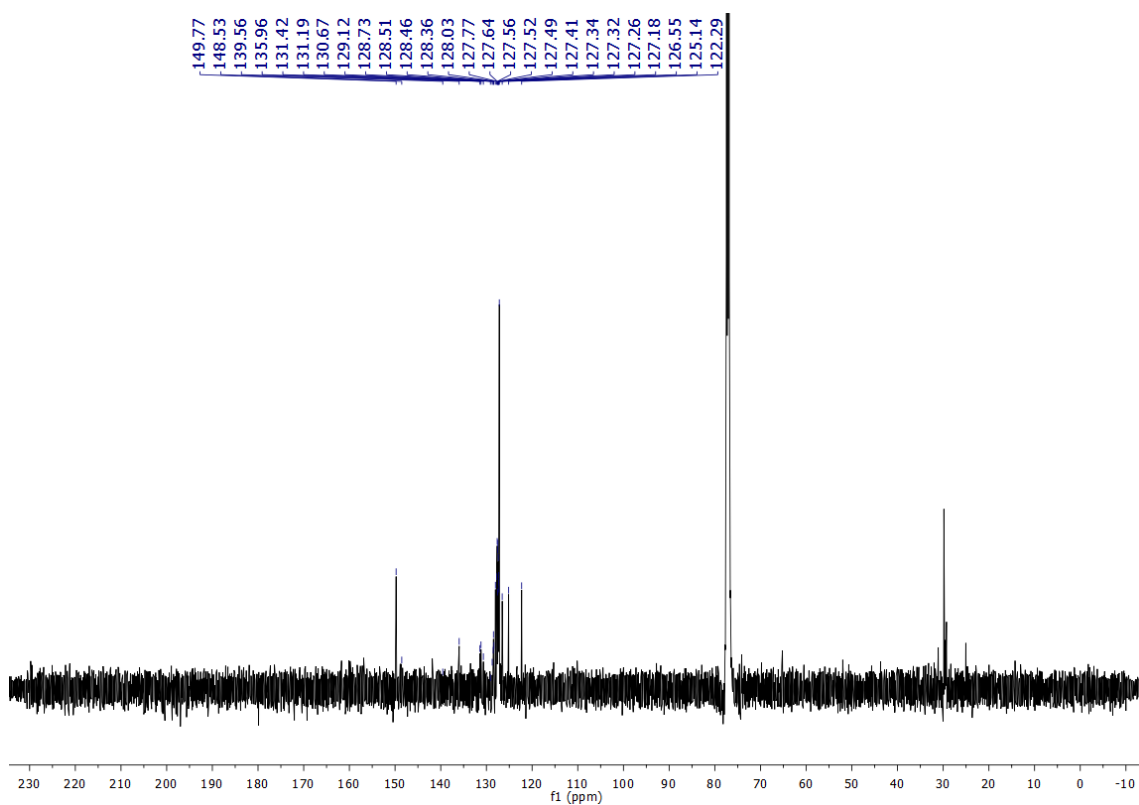

**Figure S 4.** Full  $^{13}\text{C}\{^1\text{H}\}$ -NMR (126 MHz,  $\text{CDCl}_3$ ) spectrum of compound **L1a**.

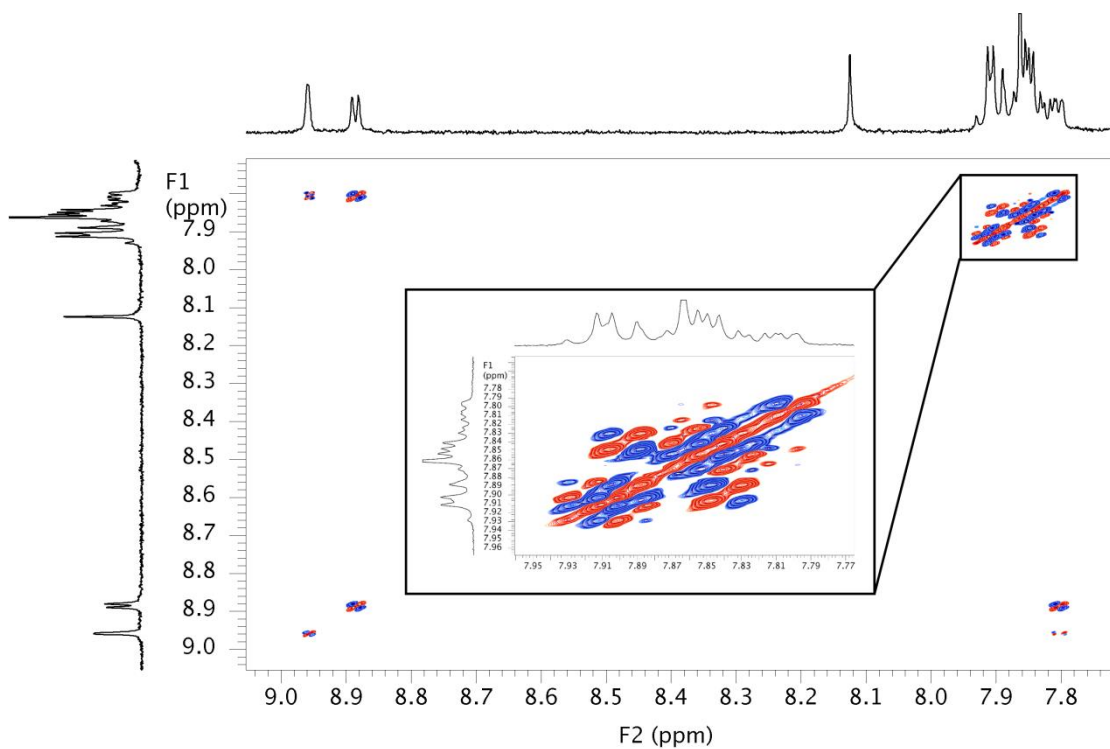

**Figure S 5.**  $^1\text{H}$ - $^1\text{H}$  gDQFCOSY (500 MHz,  $\text{CDCl}_3$ ) spectrum of compound **L1a**.

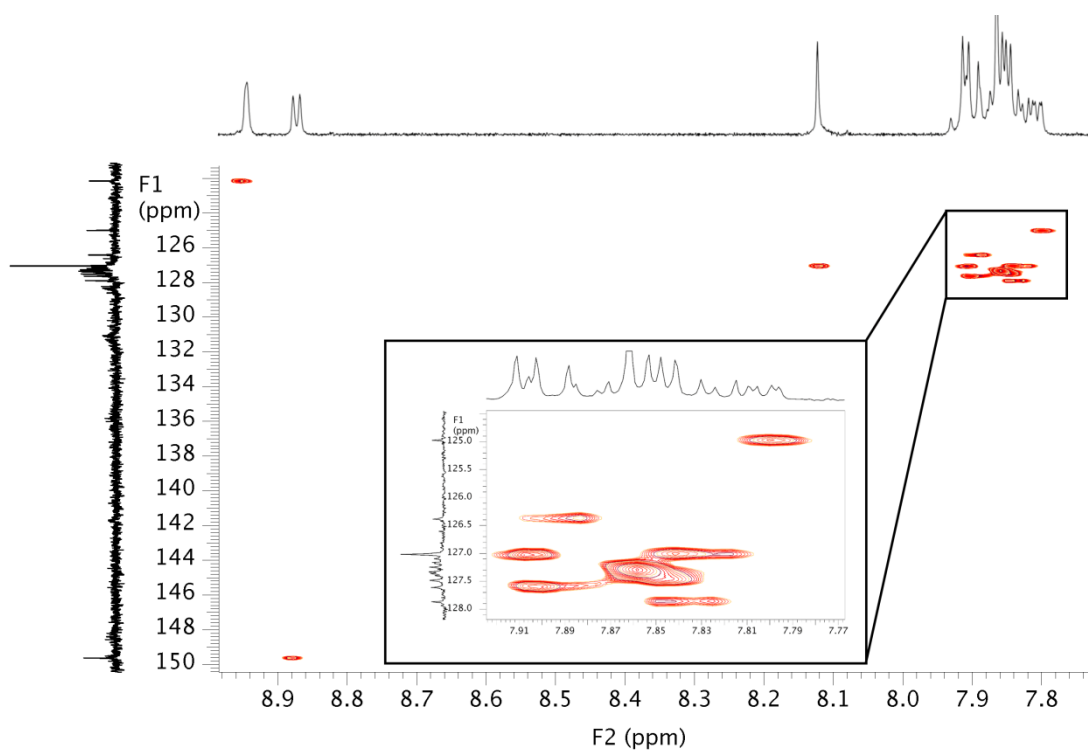

**Figure S 6.**  $^1\text{H}$ - $^{13}\text{C}$  bsgHSQCAD (500 MHz,  $\text{CDCl}_3$ ) spectrum of compound **L1a**.

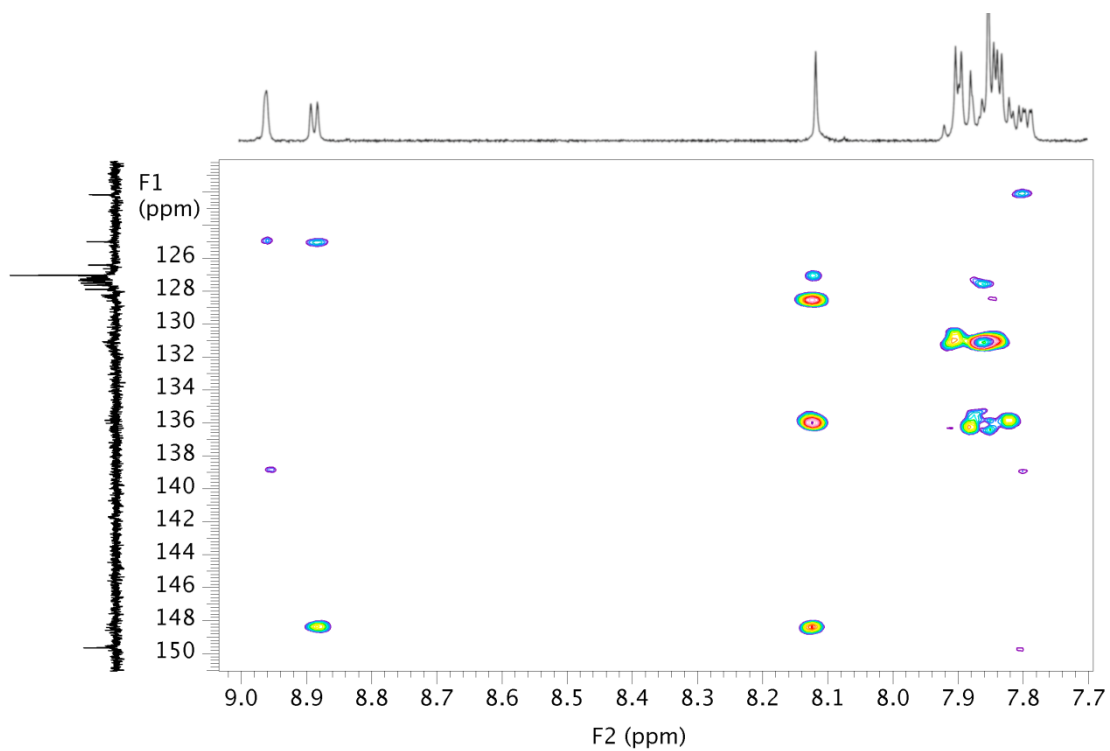

**Figure S 7.**  $^1\text{H}$ - $^{13}\text{C}$  bsgHMBC (500 MHz,  $\text{CDCl}_3$ ) spectrum of compound **L1a**.

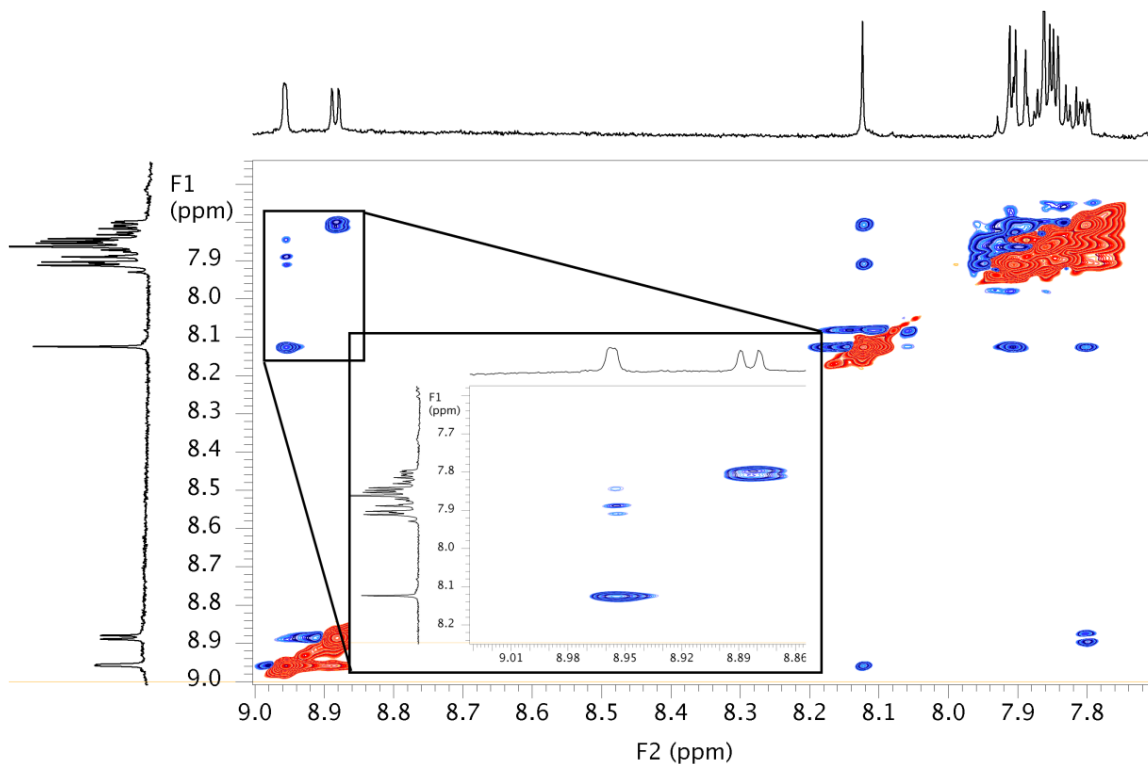

**Figure S 8.**  $^1\text{H}$ - $^1\text{H}$  bashdNOESY (500 MHz,  $\text{CDCl}_3$ ) spectrum of compound **L1a**. Some correlations are shown between pyridine and corannulene protons ( $\text{H}_3$  and  $\text{H}_8$ ) which permit the determination of those nuclei.

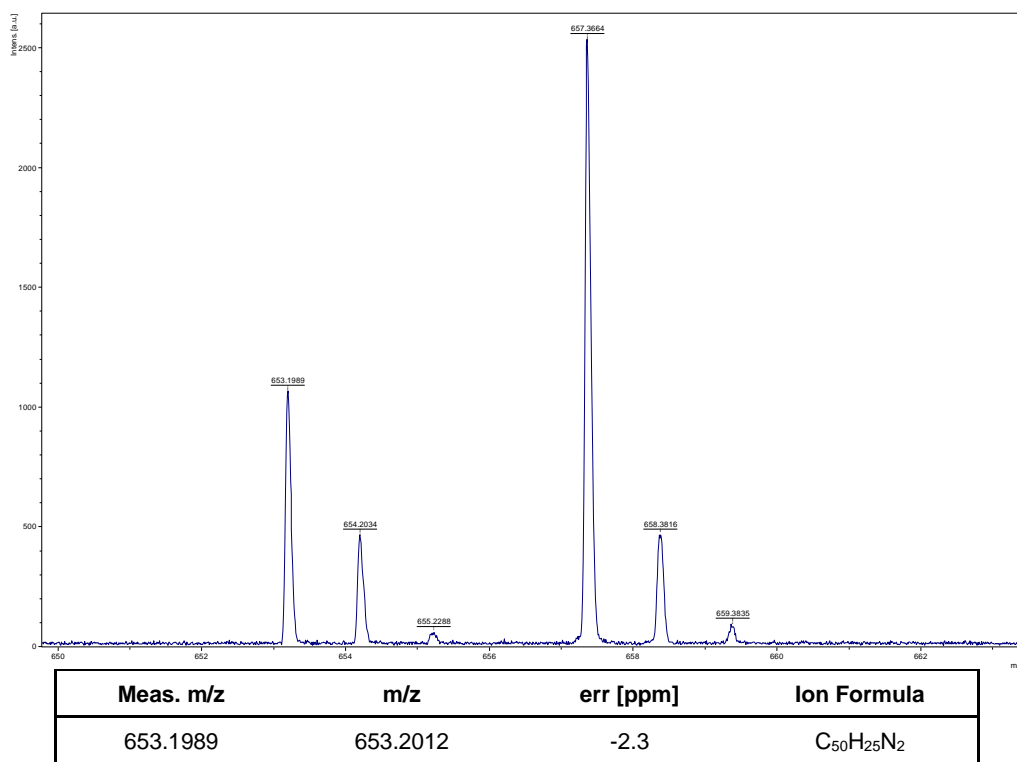

**Figure S 9.** HRMS (MALDI) of compound **L1a**  $[\text{M}+\text{H}]^+$ .

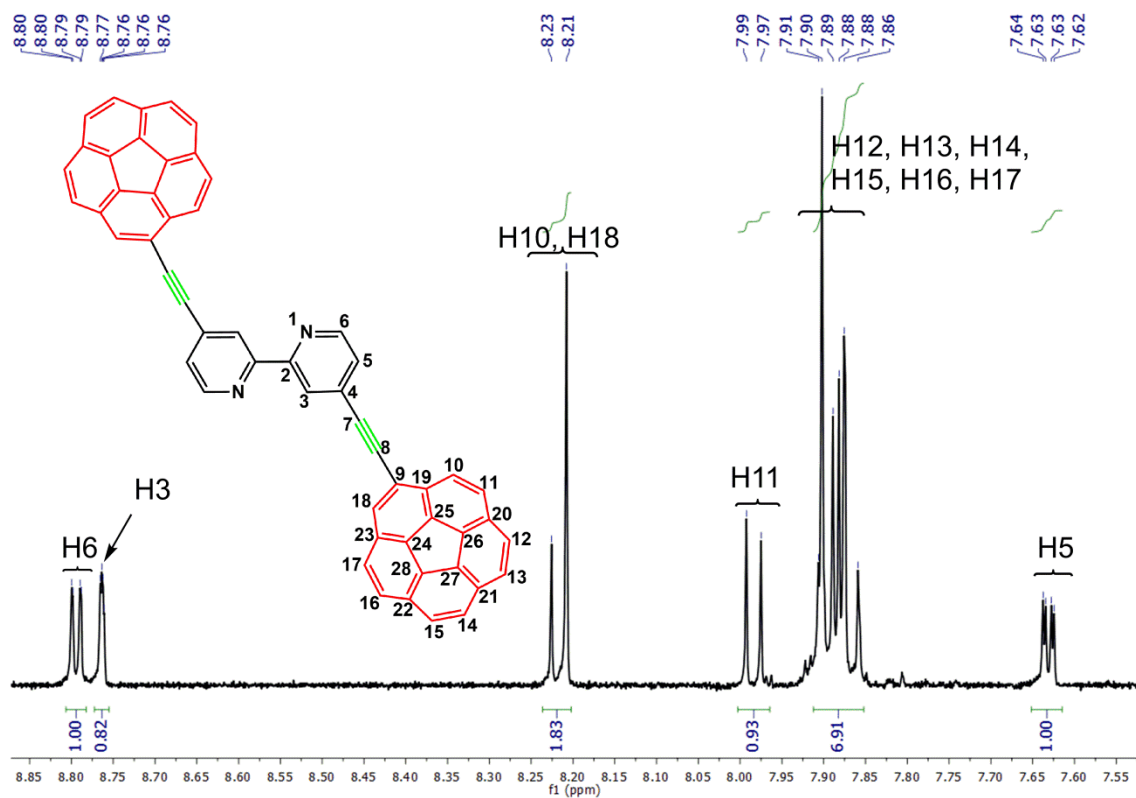

Figure S 10. <sup>1</sup>H-NMR (500 MHz, CD<sub>2</sub>Cl<sub>2</sub>) spectrum of compound L2a.

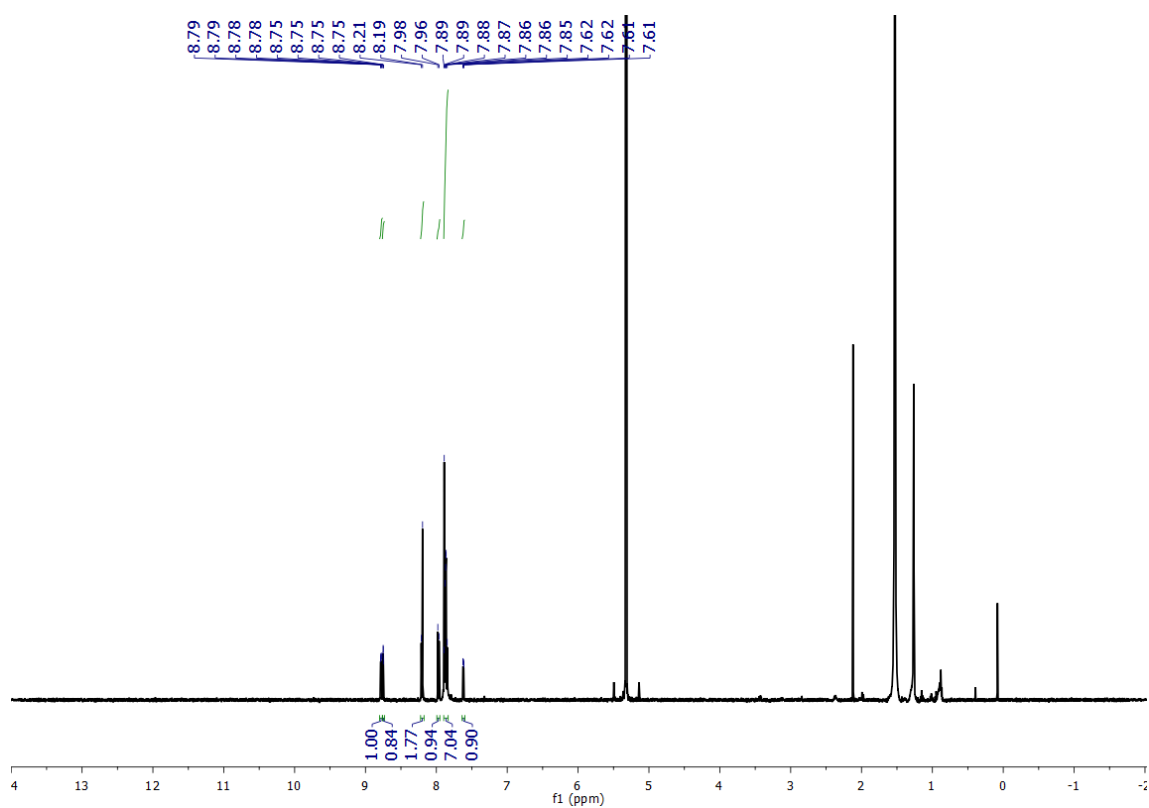

Figure S 11. Full <sup>1</sup>H-NMR (500 MHz, CD<sub>2</sub>Cl<sub>2</sub>) spectrum of compound L2a.

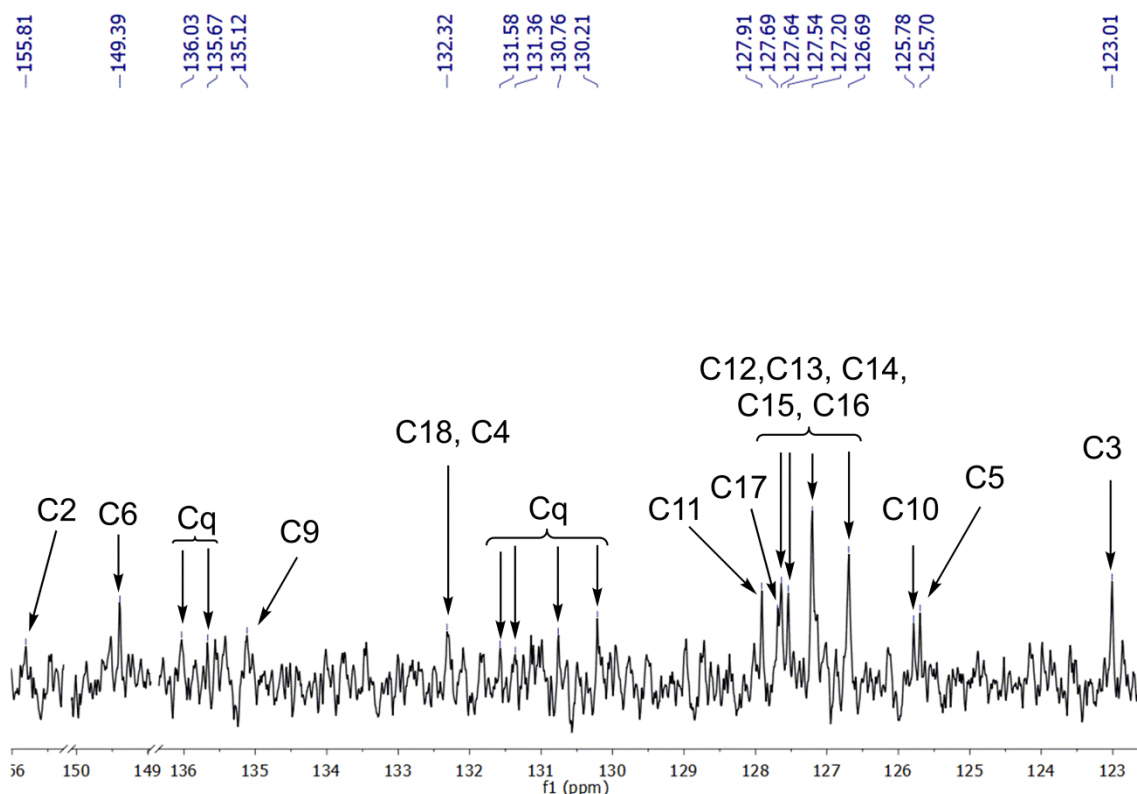

Figure S 12.  $^{13}\text{C}\{^1\text{H}\}$ -NMR (126 MHz,  $\text{CD}_2\text{Cl}_2$ ) spectrum of compound L2a.

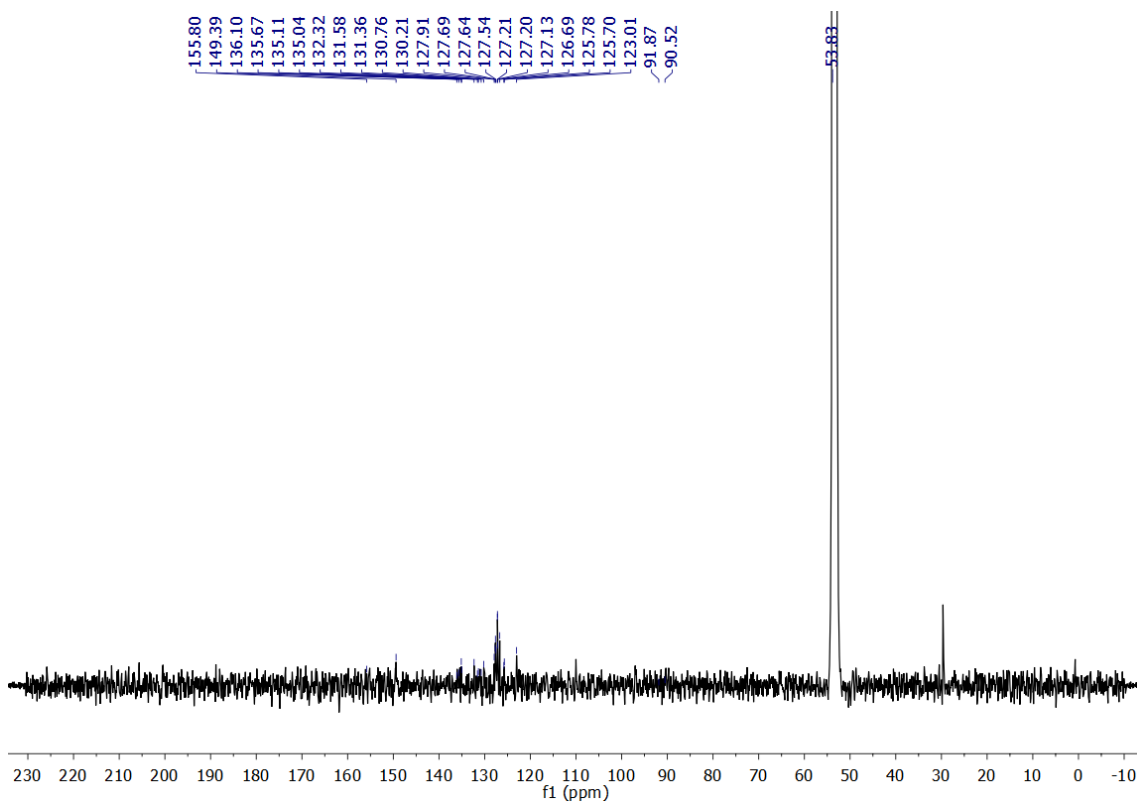

Figure S 13. Full  $^{13}\text{C}\{^1\text{H}\}$ -NMR (126 MHz,  $\text{CD}_2\text{Cl}_2$ ) spectrum of compound L2a.

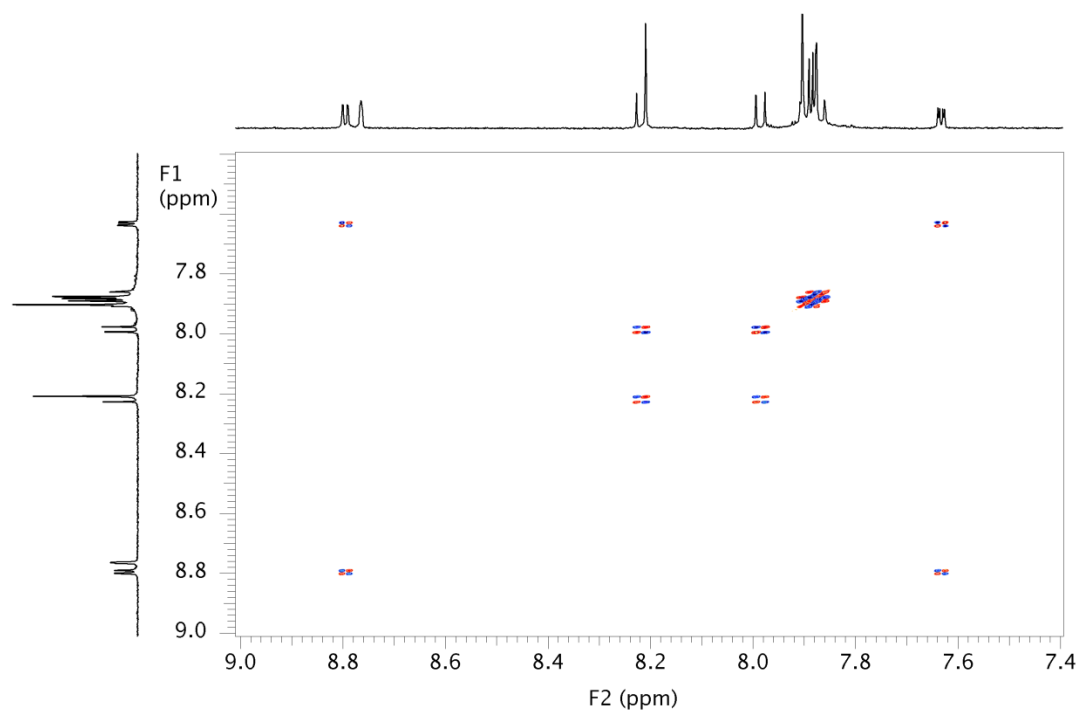

**Figure S 14.**  $^1\text{H}$ - $^1\text{H}$  gDQFCOSY (500 MHz,  $\text{CD}_2\text{Cl}_2$ ) spectrum of compound **L2a**.

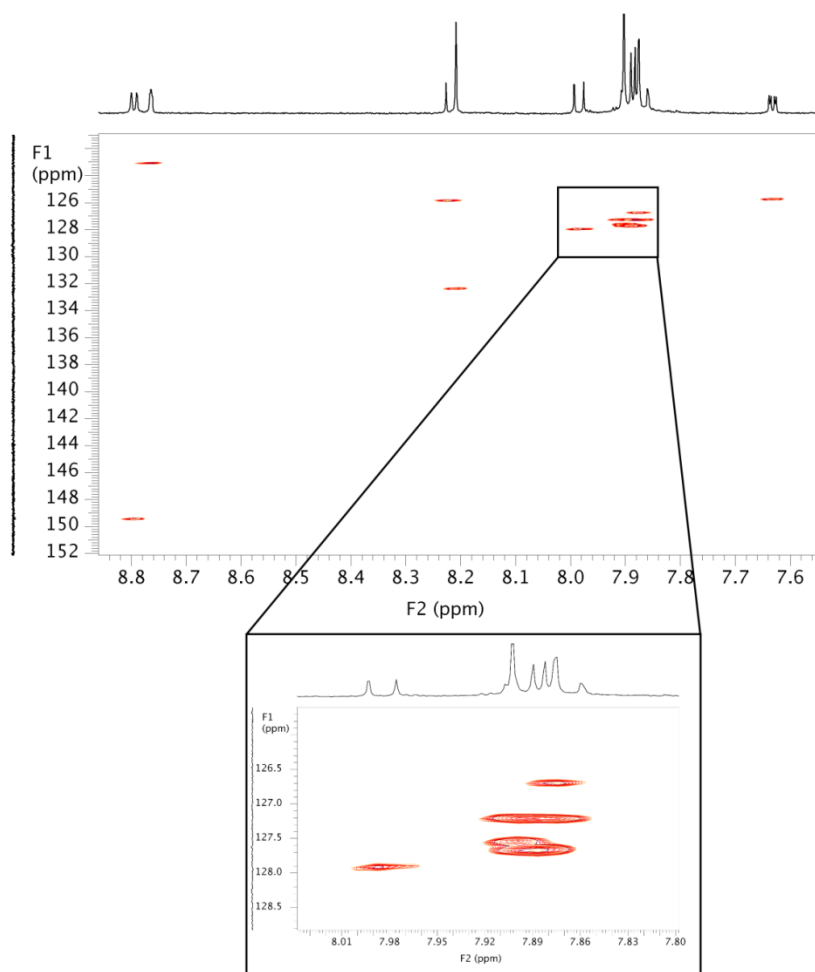

**Figure S 15.**  $^1\text{H}$ - $^{13}\text{C}$  bsgHSQCAD (500 MHz,  $\text{CD}_2\text{Cl}_2$ ) spectrum of compound **L2a**.



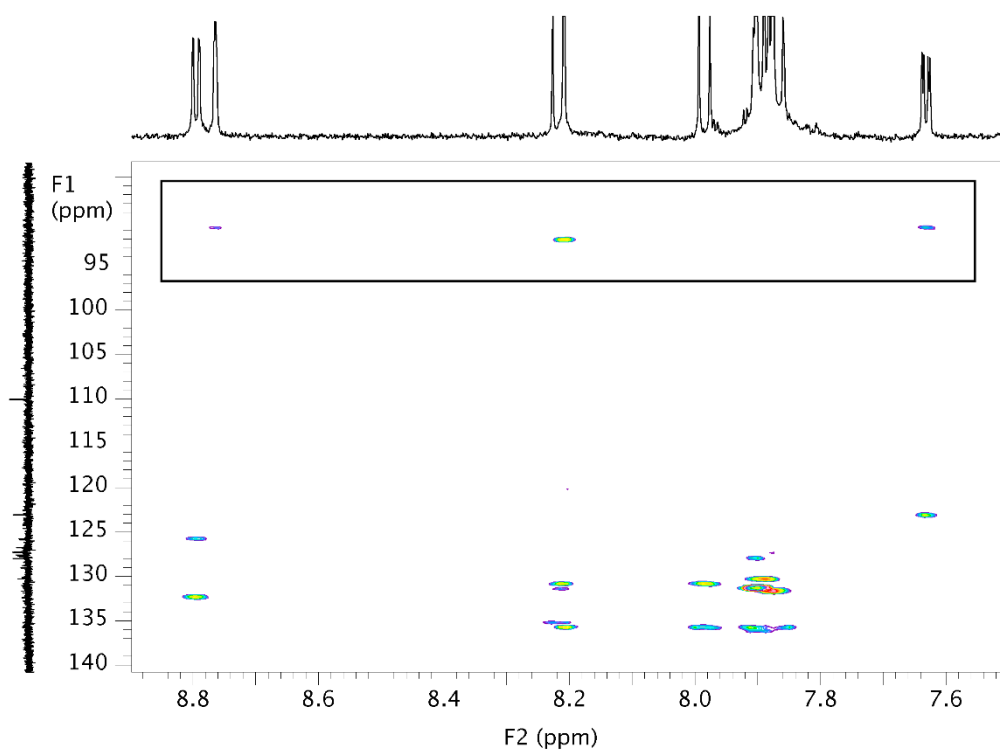

**Figure S 16.**  $^1\text{H}$ - $^{13}\text{C}$  g2cHMBC (500 MHz,  $\text{CD}_2\text{Cl}_2$ ) spectrum of compound **L2a**. In this experiment, carbons  $\text{C}_7$  and  $\text{C}_8$  have been determined by cross peaks with protons from bipyridine ( $\text{H}_3$  and  $\text{H}_5$ ) and corannulene ( $\text{H}_{18}$ ) moieties.

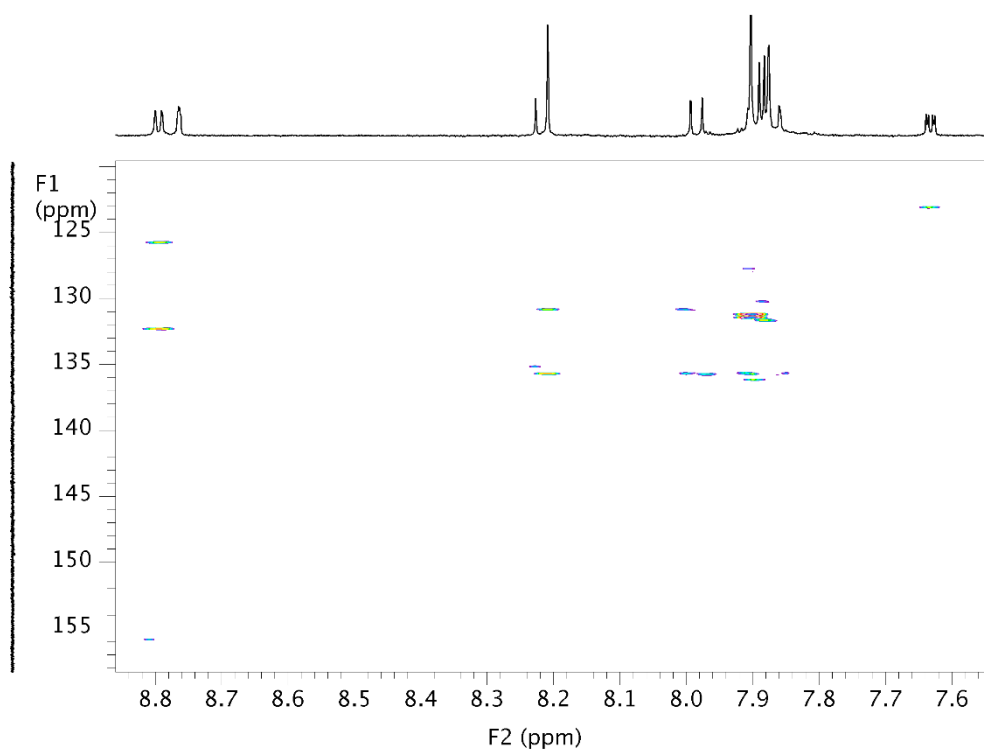

**Figure S 17.**  $^1\text{H}$ - $^{13}\text{C}$  bsgHMBC (500 MHz,  $\text{CD}_2\text{Cl}_2$ ) spectrum of compound **L2a**.

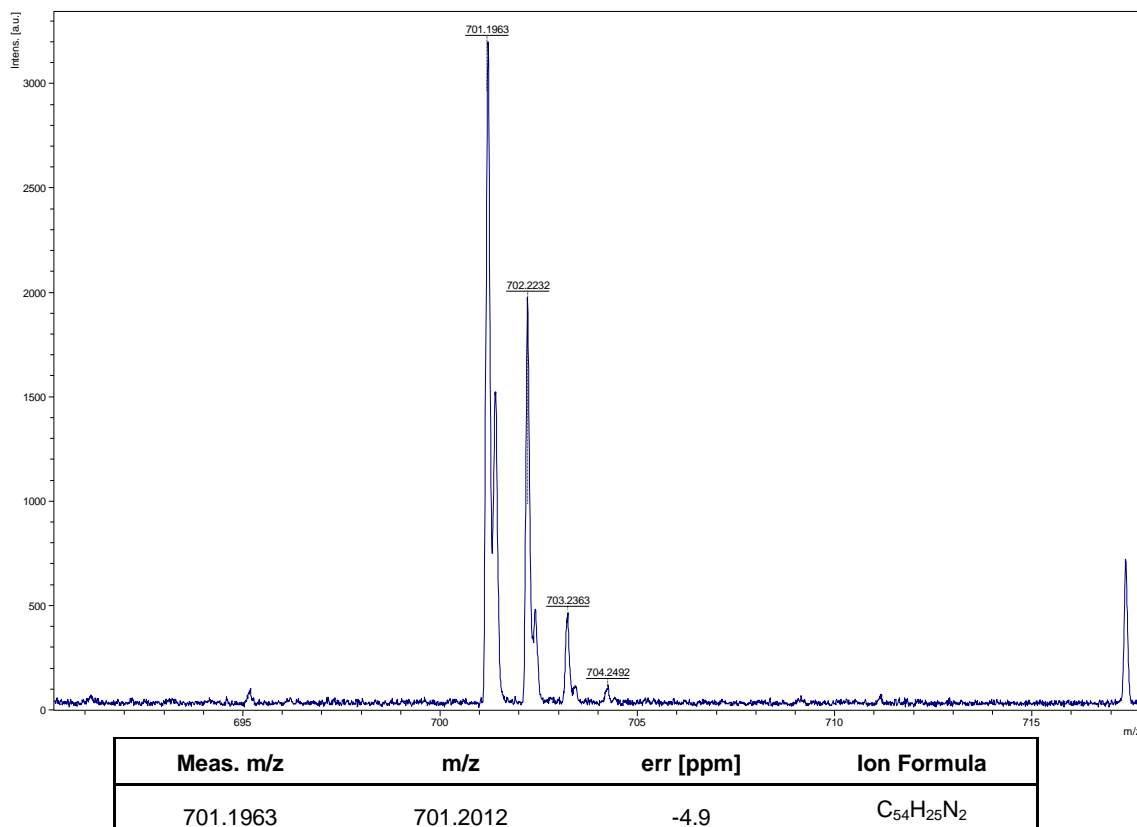

Figure S 18. HRMS (MALDI) of compound L2a [M+H]<sup>+</sup>.

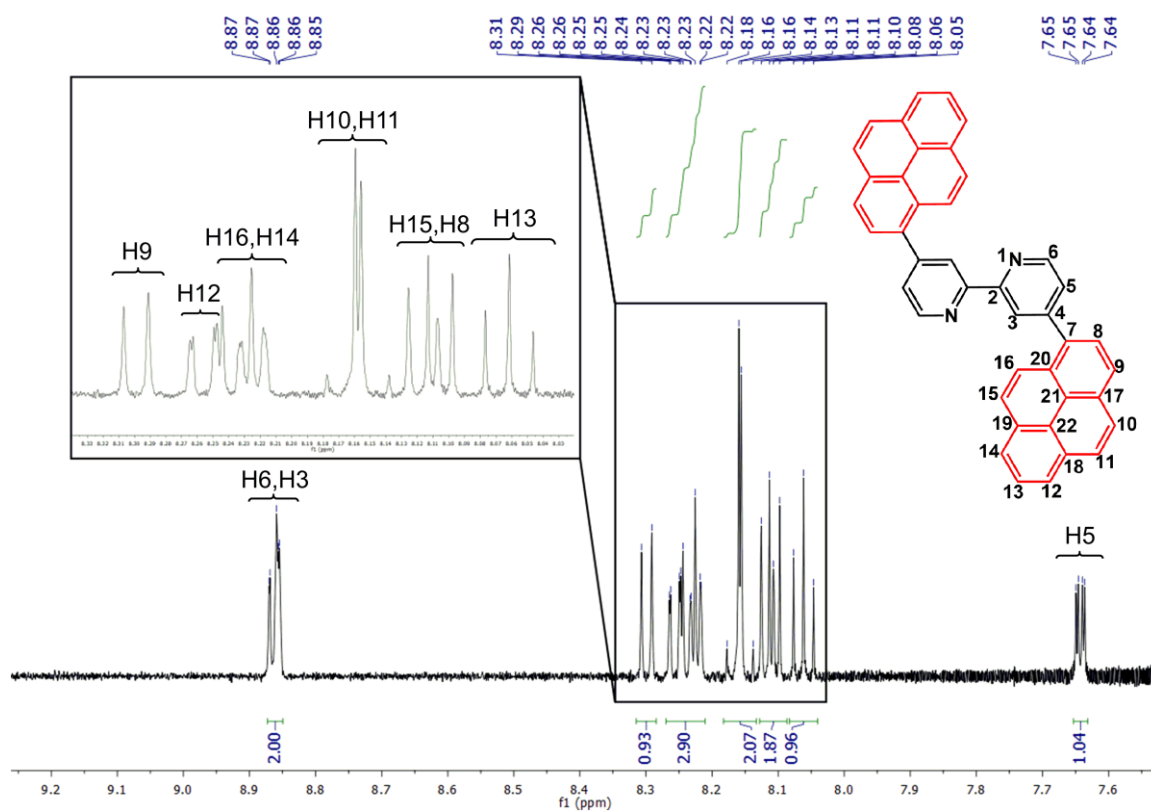

Figure S 19. <sup>1</sup>H-NMR (500 MHz, CDCl<sub>3</sub>) spectrum of compound L1b.

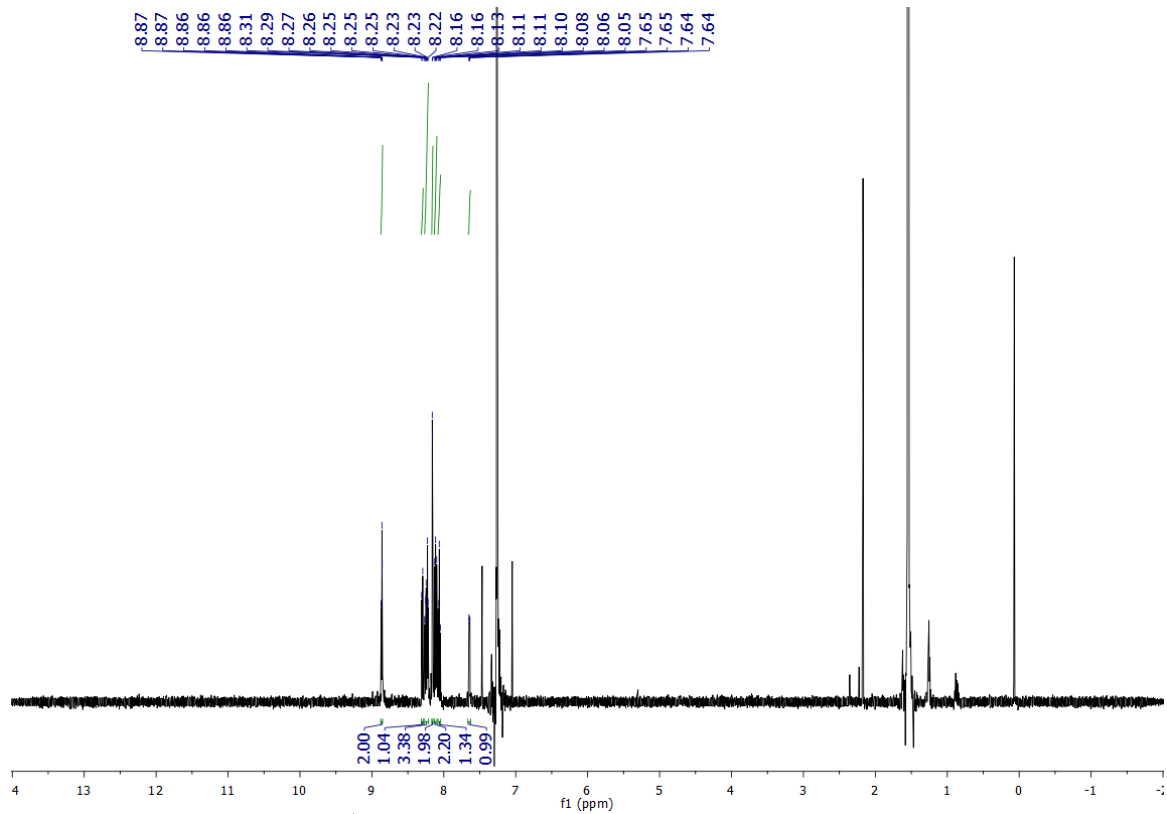

Figure S 20. Full <sup>1</sup>H-NMR (500 MHz, CDCl<sub>3</sub>) spectrum of compound L1b.

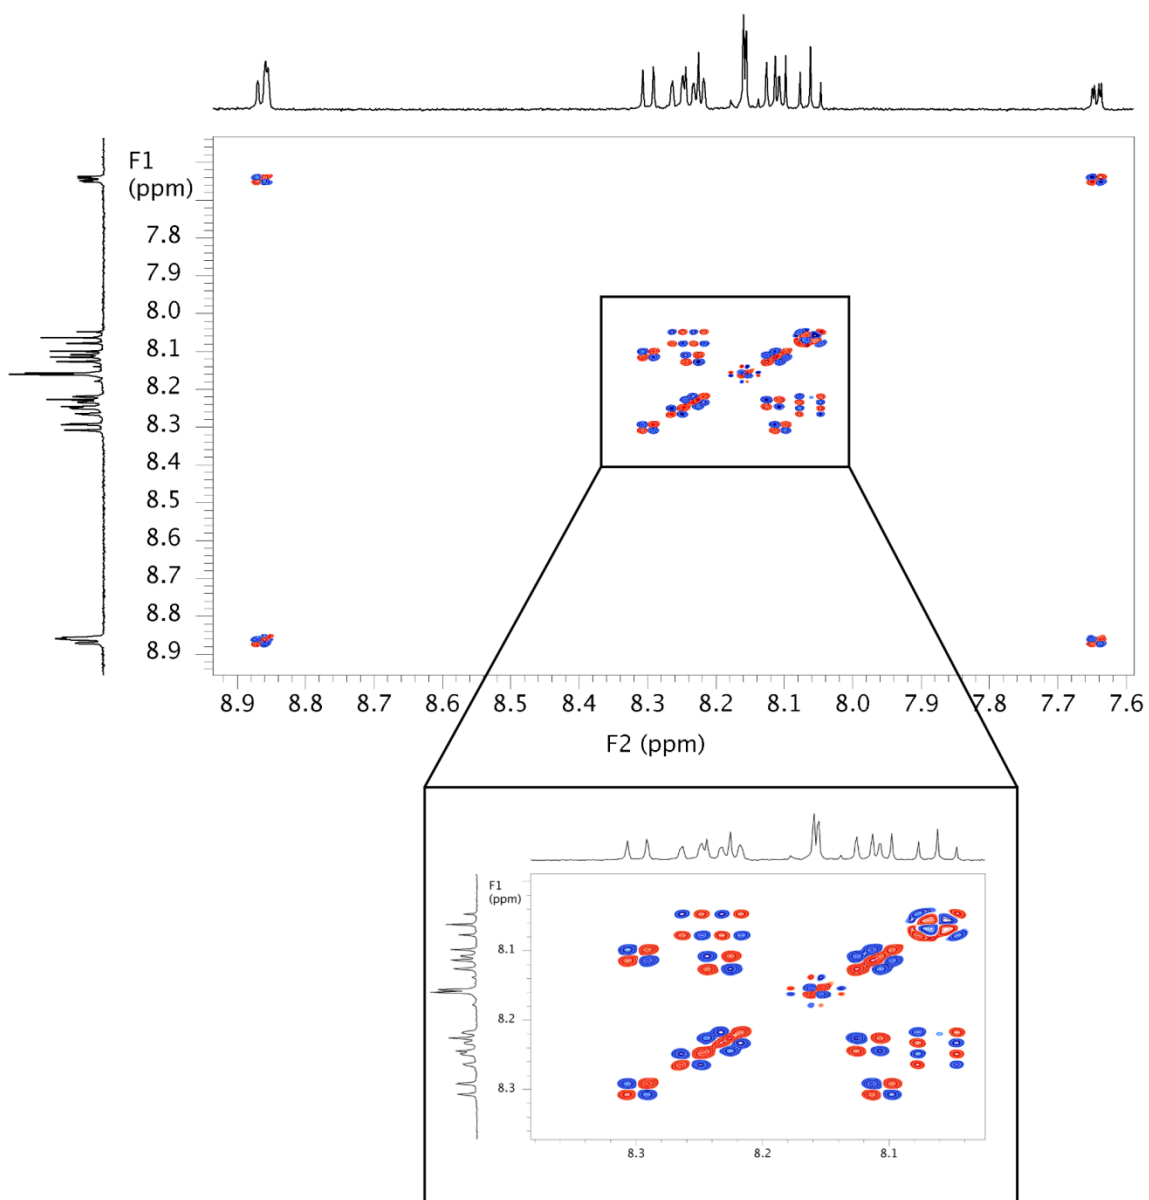

**Figure S 21.**  $^1\text{H}$ - $^1\text{H}$  gDQFCOSY (500 MHz,  $\text{CDCl}_3$ ) spectrum of compound L1b.

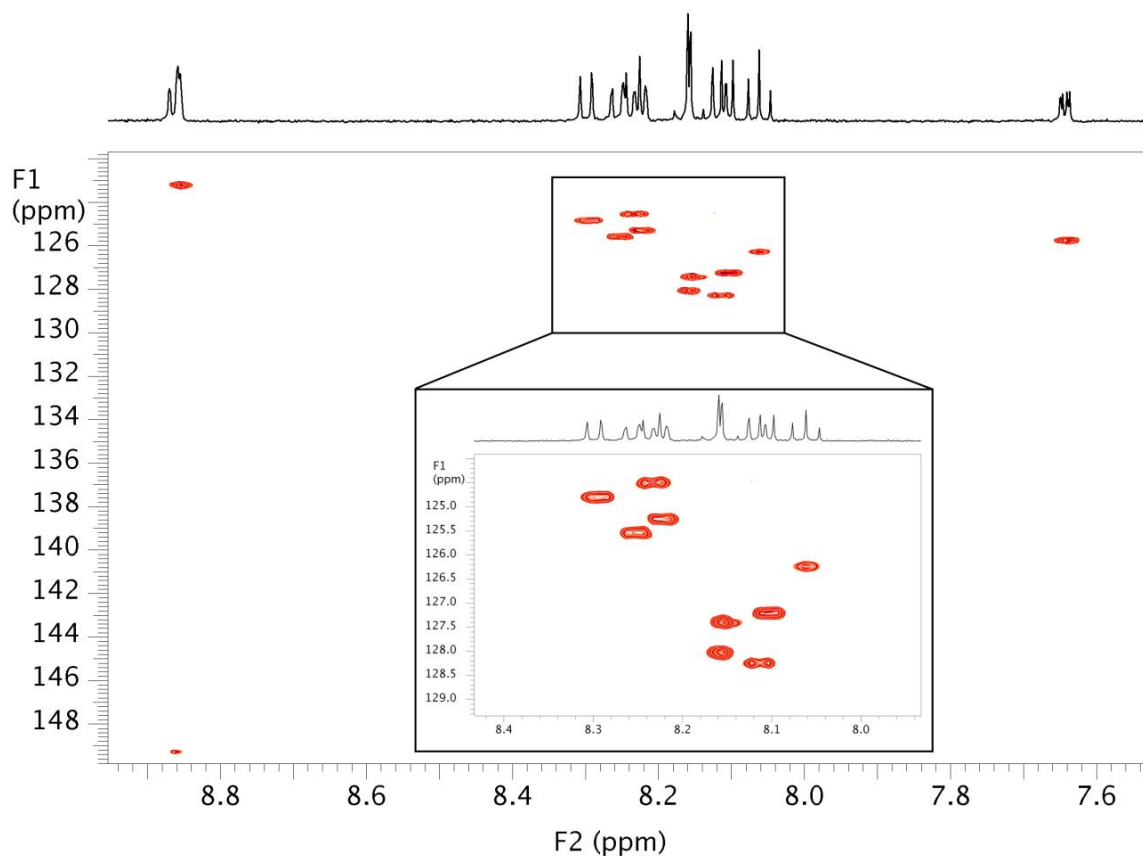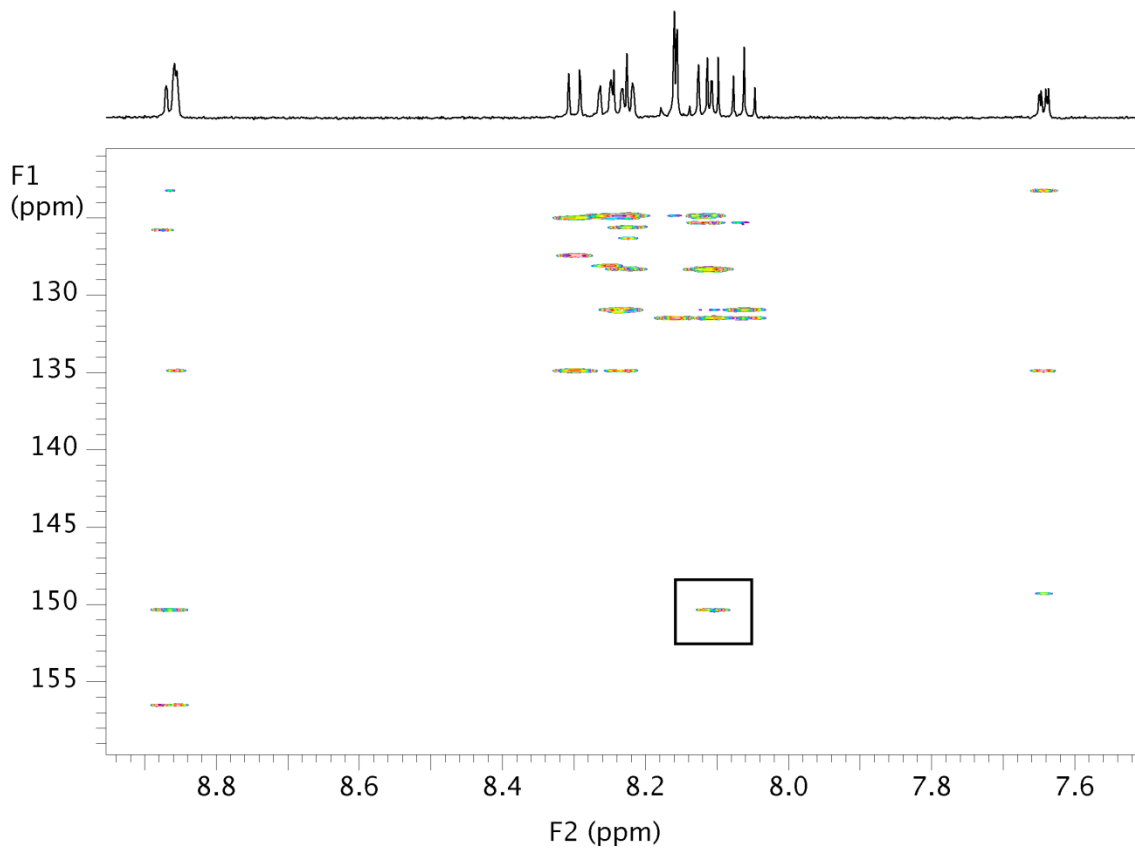

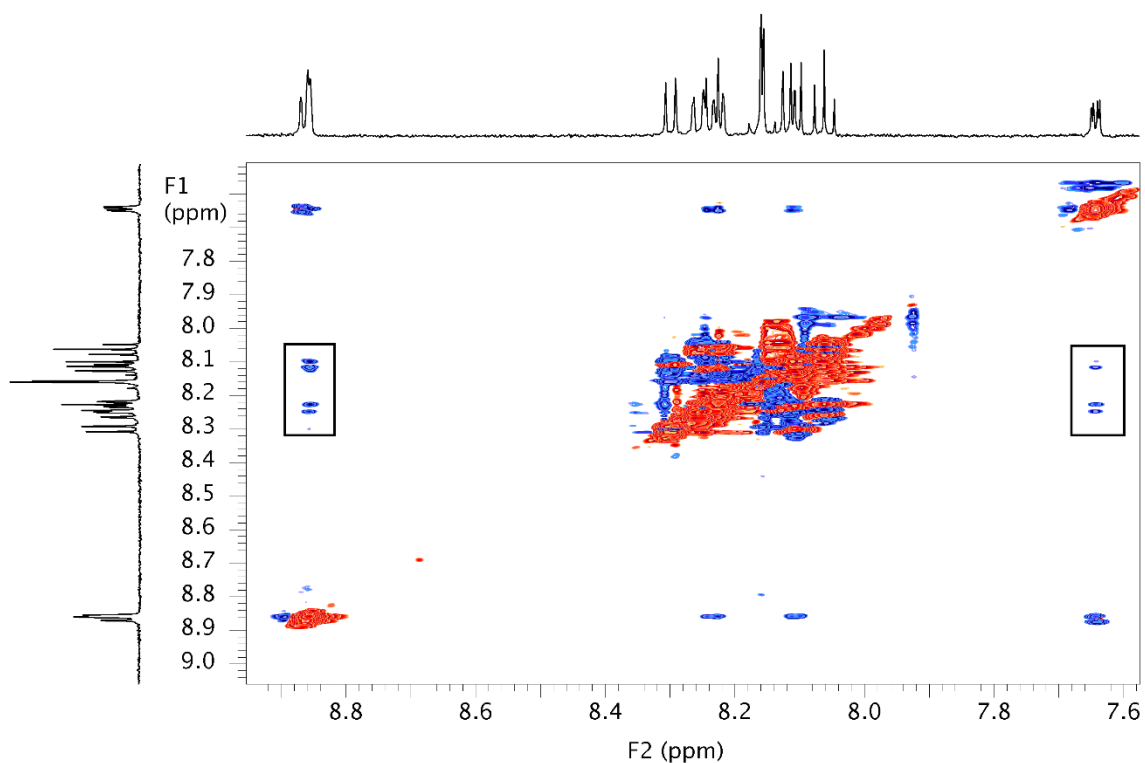

**Figure S 24.**  $^1\text{H}$ - $^1\text{H}$  bashdROESY (500 MHz,  $\text{CDCl}_3$ ) spectrum of compound **L1b**. There are some correlations between pyridine and pyrene protons allowing the differentiation between  $\text{H}_8$  and  $\text{H}_{16}$  in pyrene moiety. This experiment along with previously shown  $^1\text{H}$ - $^{13}\text{C}$  bsghHMBC spectrum were crucial for such a task.

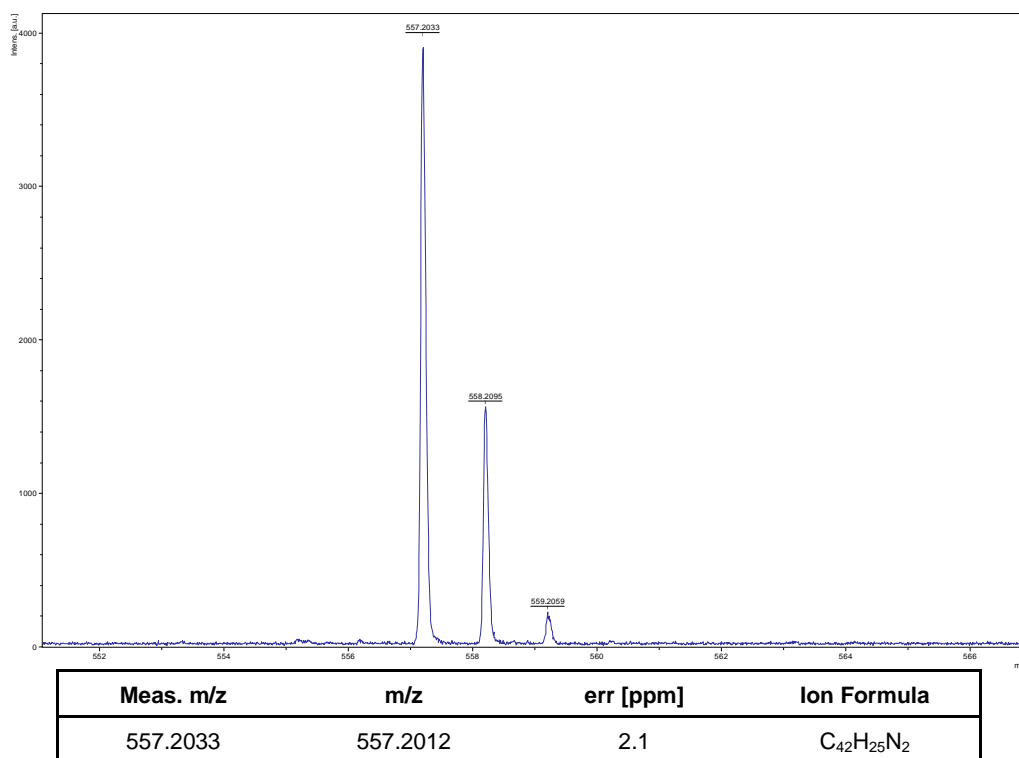

**Figure S 25.** HRMS (MALDI) of compound **L1b**  $[\text{M}+\text{H}]^+$ .

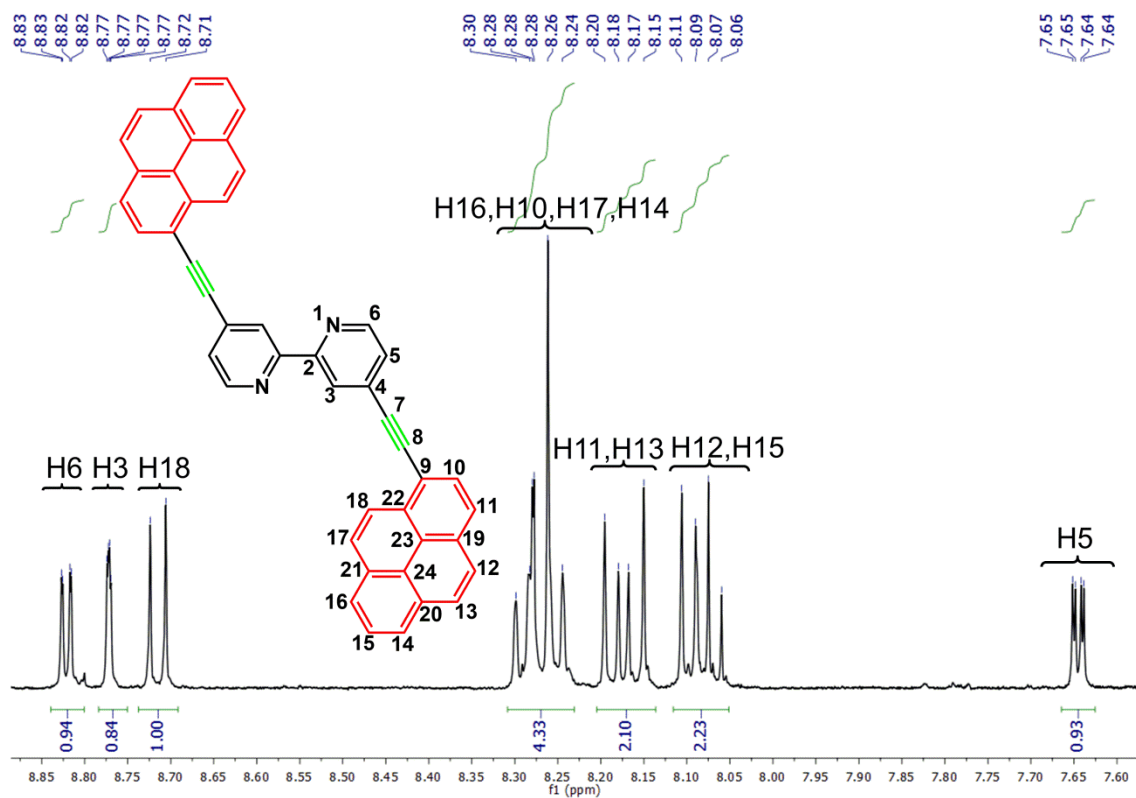

Figure S 26. <sup>1</sup>H-NMR (500 MHz, CDCl<sub>3</sub>) spectrum of compound L2b.

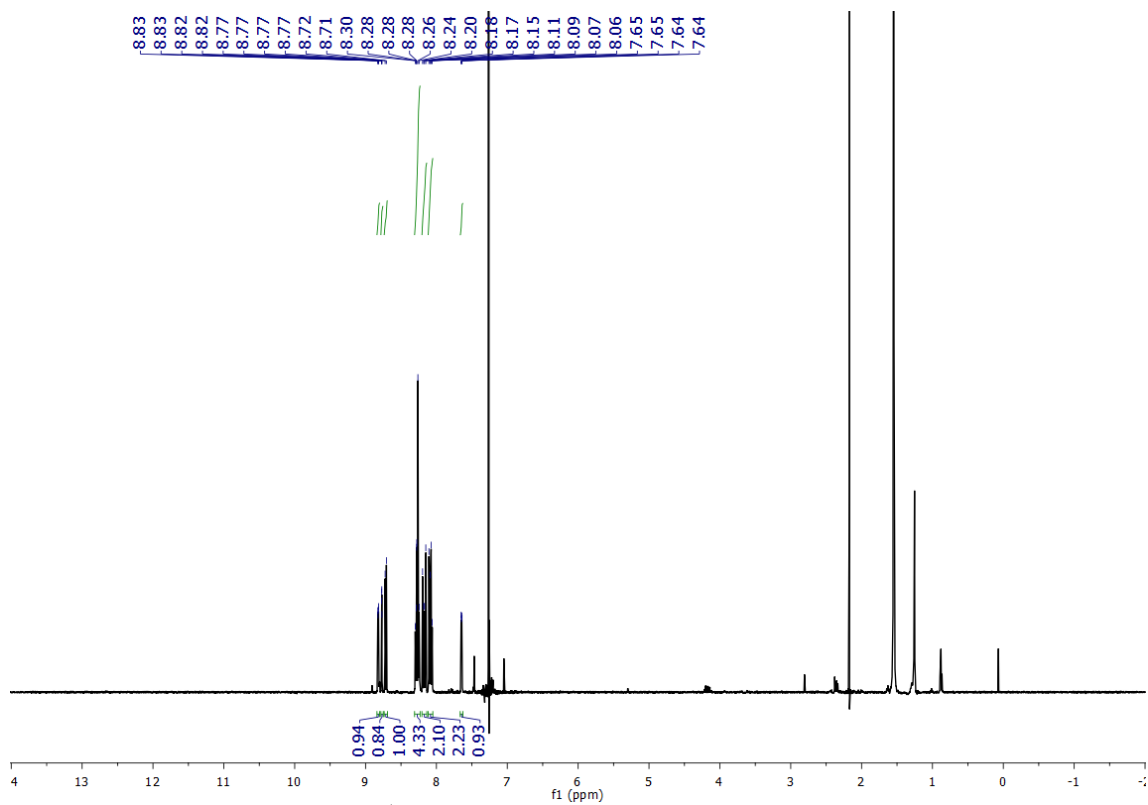

Figure S 27. Full <sup>1</sup>H-NMR (500 MHz, CDCl<sub>3</sub>) spectrum of compound L2b.

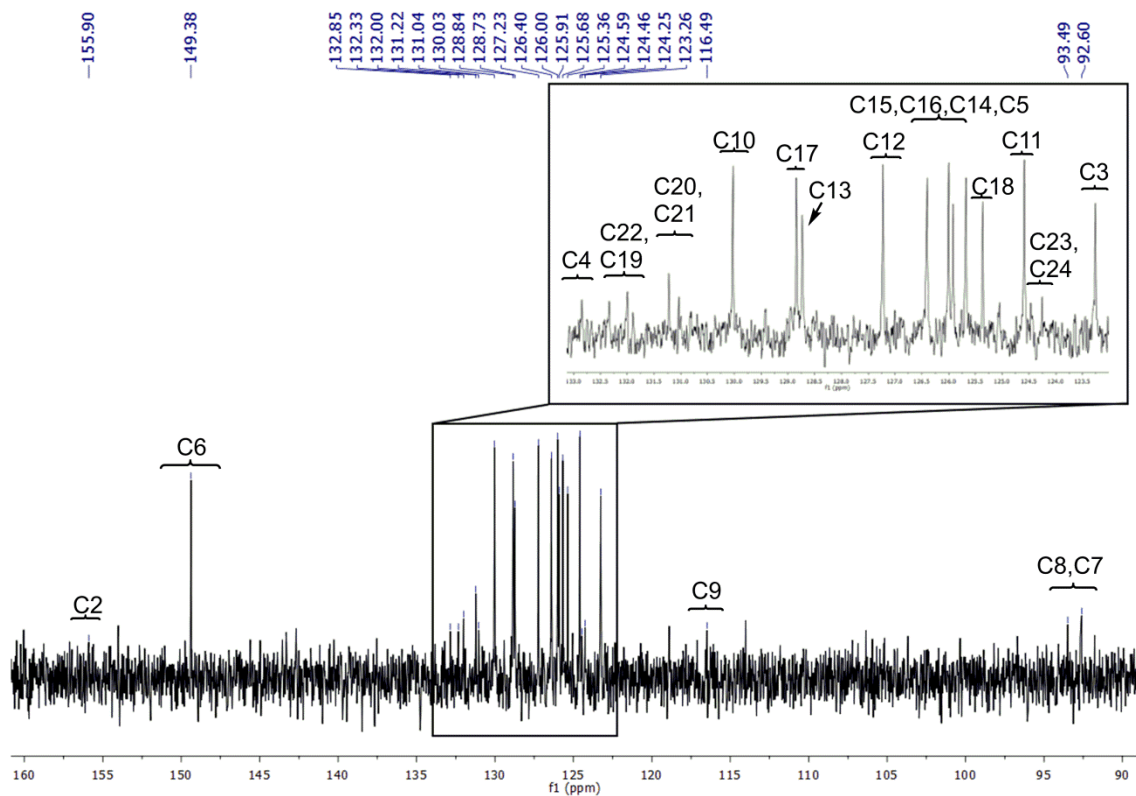

Figure S 28.  $^{13}\text{C}\{^1\text{H}\}$ -NMR (126 MHz,  $\text{CDCl}_3$ ) spectrum of compound L2b.

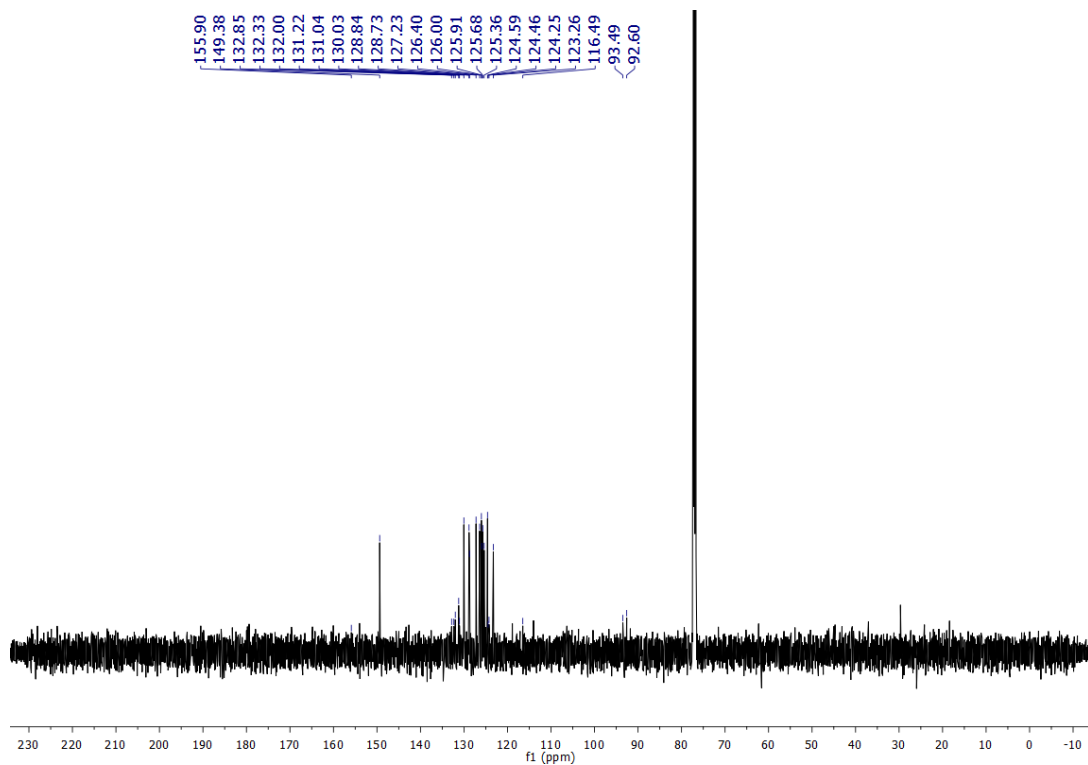

Figure S 29. Full  $^{13}\text{C}\{^1\text{H}\}$ -NMR (126 MHz,  $\text{CDCl}_3$ ) spectrum of compound L2b.



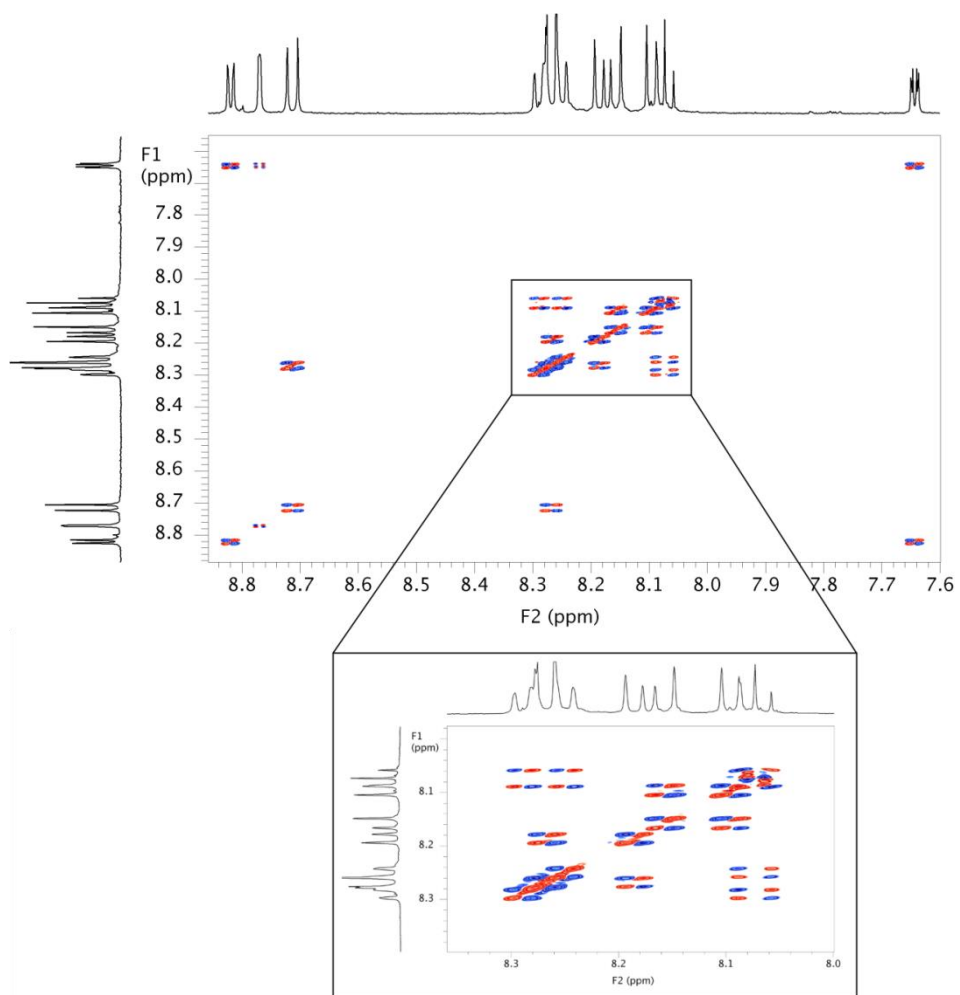

**Figure S 30.**  $^1\text{H}$ - $^1\text{H}$  gDQFCOSY (500 MHz,  $\text{CDCl}_3$ ) spectrum of compound L2b.

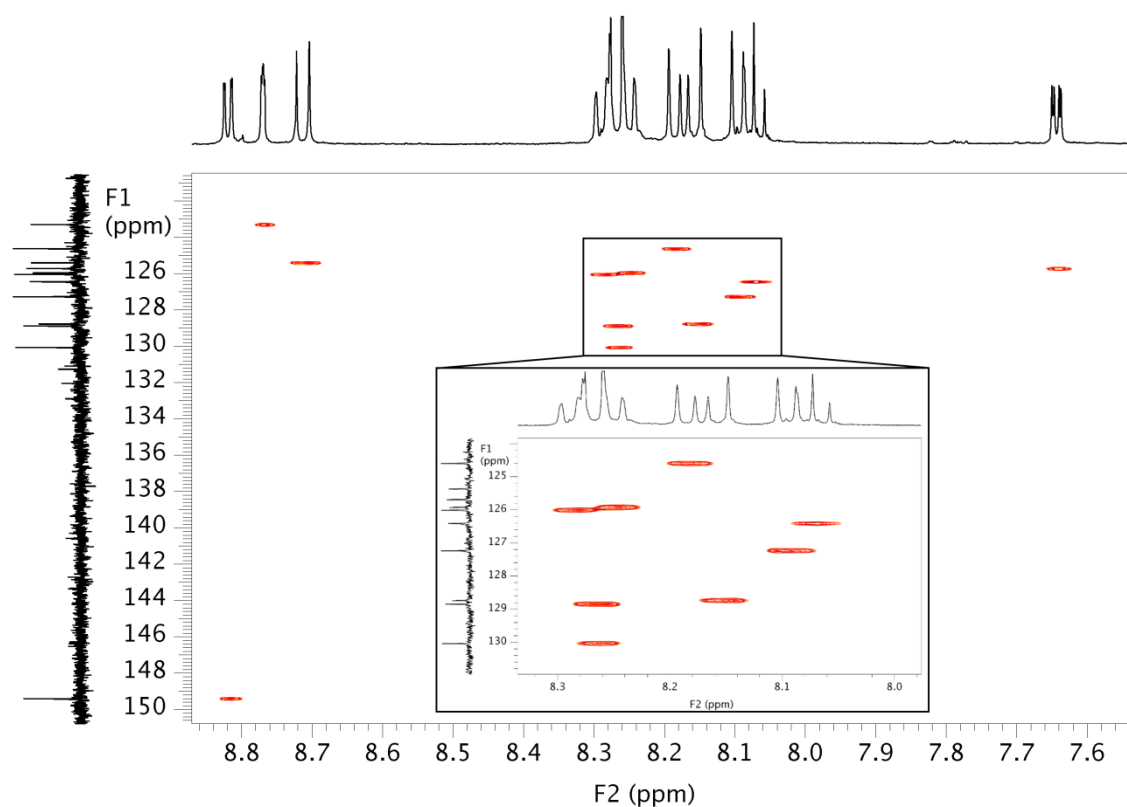

**Figure S 31.**  $^1\text{H}$ - $^{13}\text{C}$  bsgHSQCAD (500 MHz,  $\text{CDCl}_3$ ) spectrum of compound **L2b**.

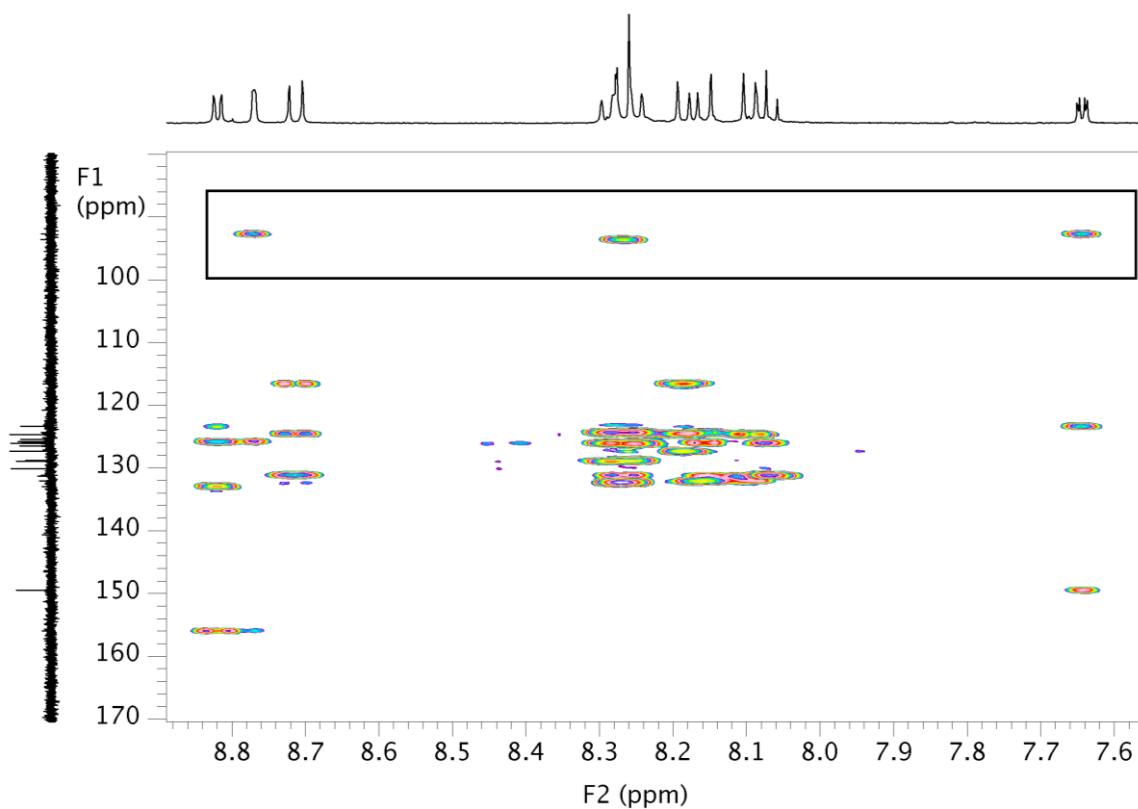

**Figure S 32.**  $^1\text{H}$ - $^{13}\text{C}$  g2cHMBC (500 MHz,  $\text{CDCl}_3$ ) spectrum of compound **L2b**. In this experiment, carbons  $\text{C}_7$  and  $\text{C}_8$  have been determined by cross peaks with protons from bipyridine ( $\text{H}_3$  and  $\text{H}_5$ ) and pyrene ( $\text{H}_{10}$ ) moieties.

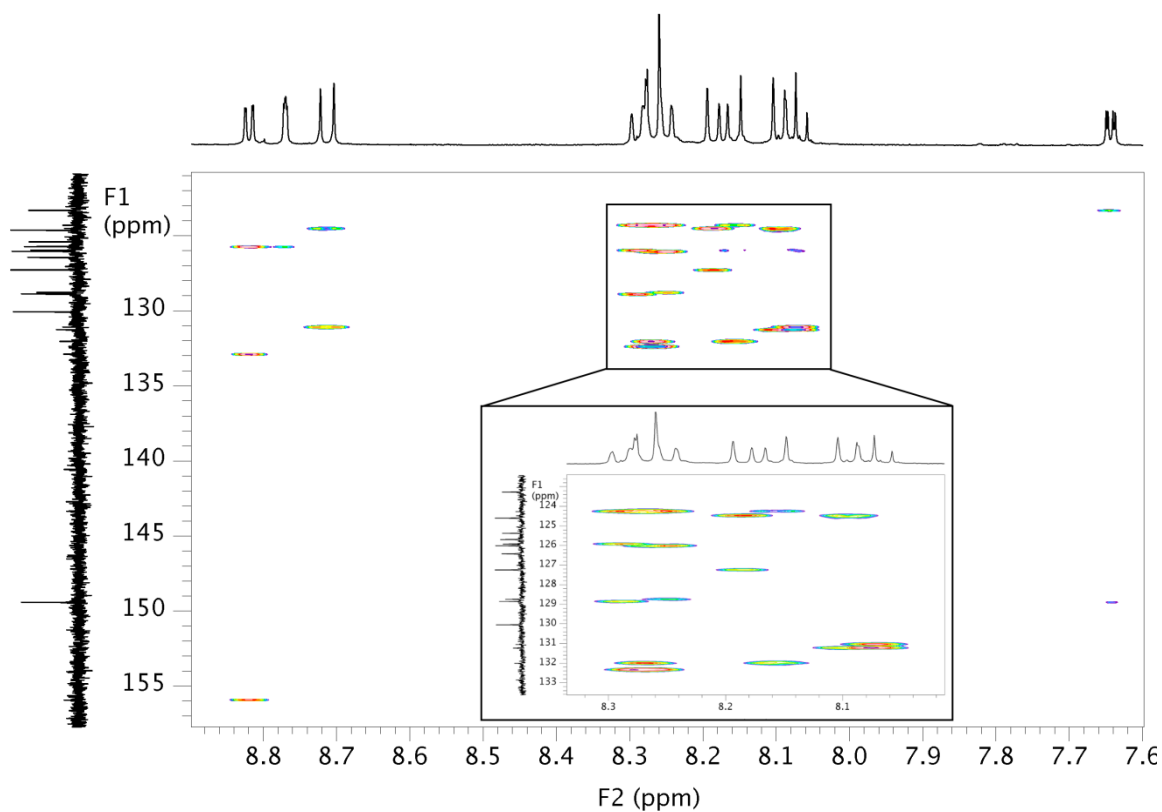

**Figure S 33.**  $^1\text{H}$ - $^{13}\text{C}$  bsgHMBC (500 MHz,  $\text{CDCl}_3$ ) spectrum of compound **L2b**.

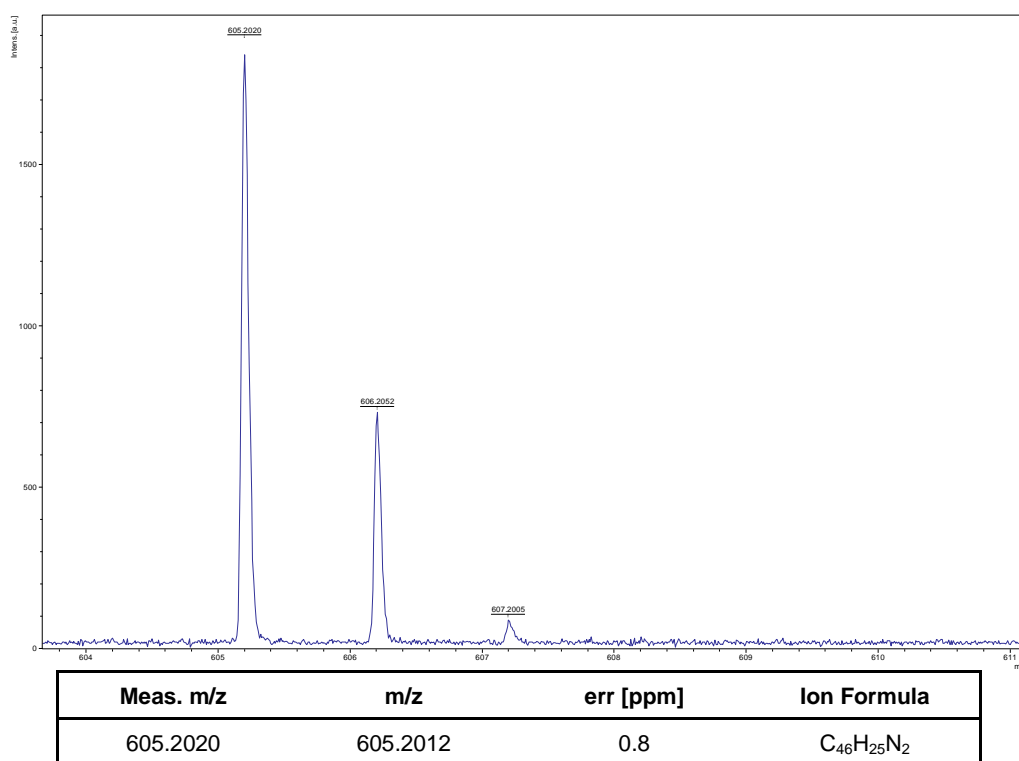

**Figure S 34.** HRMS (MALDI) of compound **L2b**  $[\text{M}+\text{H}]^+$ .

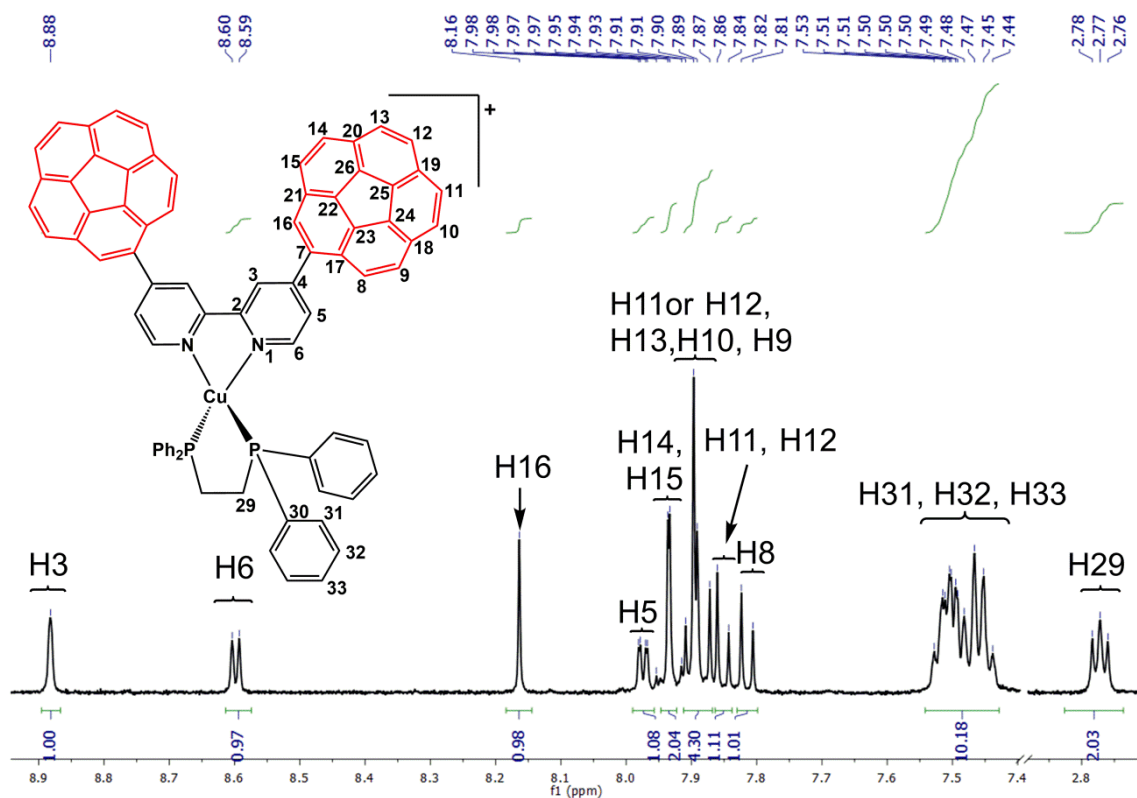

Figure S 35. <sup>1</sup>H-NMR (500 MHz, CD<sub>2</sub>Cl<sub>2</sub>) spectrum of complex **Cu1a**.

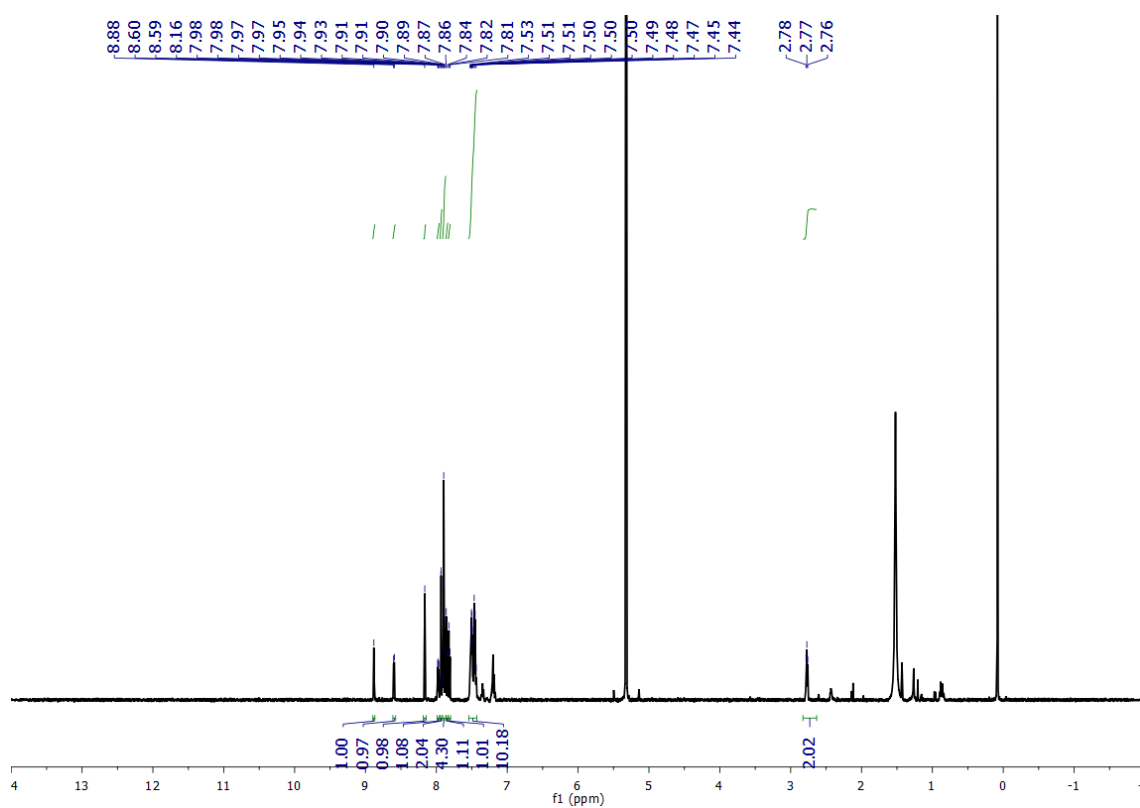

Figure S 36. <sup>1</sup>H-NMR (500 MHz, CD<sub>2</sub>Cl<sub>2</sub>) spectrum of complex **Cu1a**.

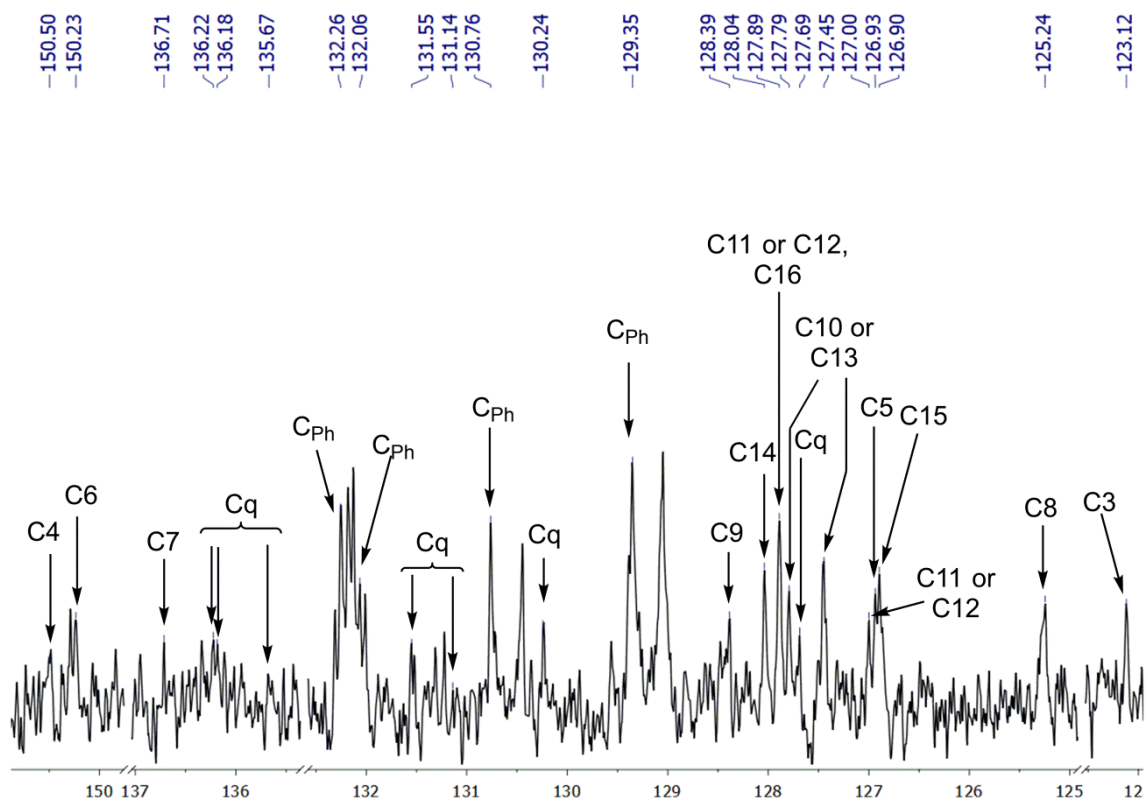

Figure S 37.  $^{13}\text{C}\{^1\text{H}\}$ -NMR (126 MHz,  $\text{CD}_2\text{Cl}_2$ ) spectrum of **Cu1a**.

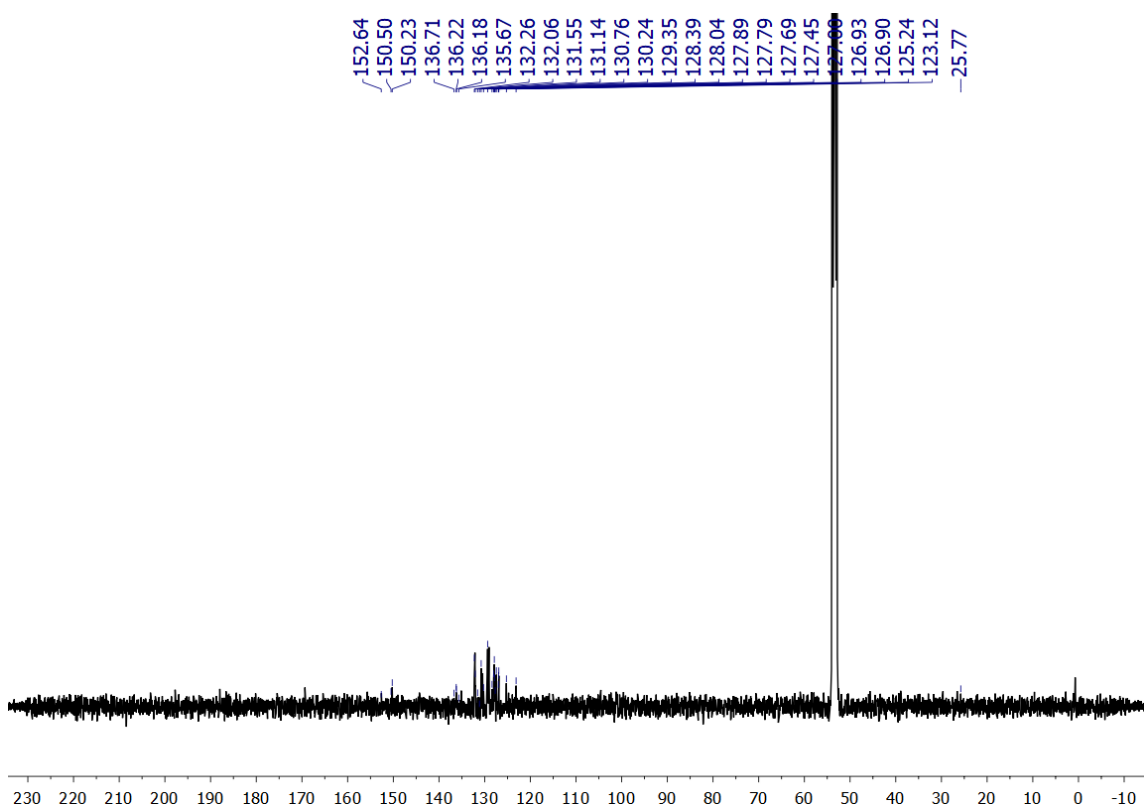

Figure S 38. Full  $^{13}\text{C}\{^1\text{H}\}$ -NMR (126 MHz,  $\text{CD}_2\text{Cl}_2$ ) spectrum of complex **Cu1a**.

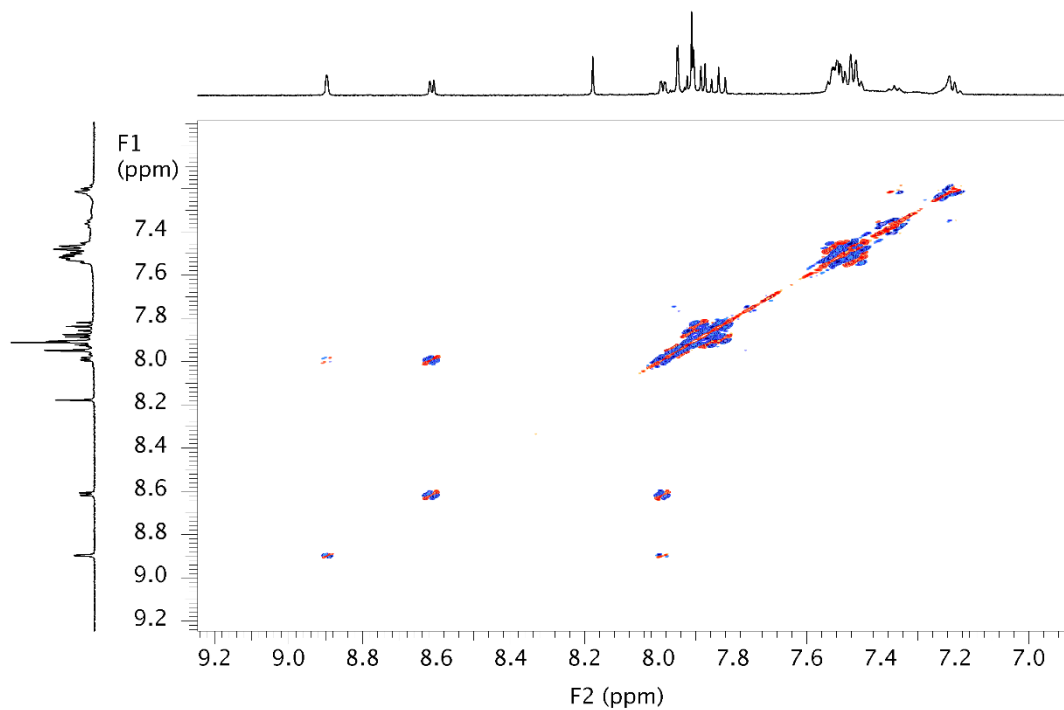

**Figure S 39.**  $^1\text{H}$ - $^1\text{H}$  gDQFCOSY (500 MHz,  $\text{CD}_2\text{Cl}_2$ ) spectrum of complex **Cu1a**.

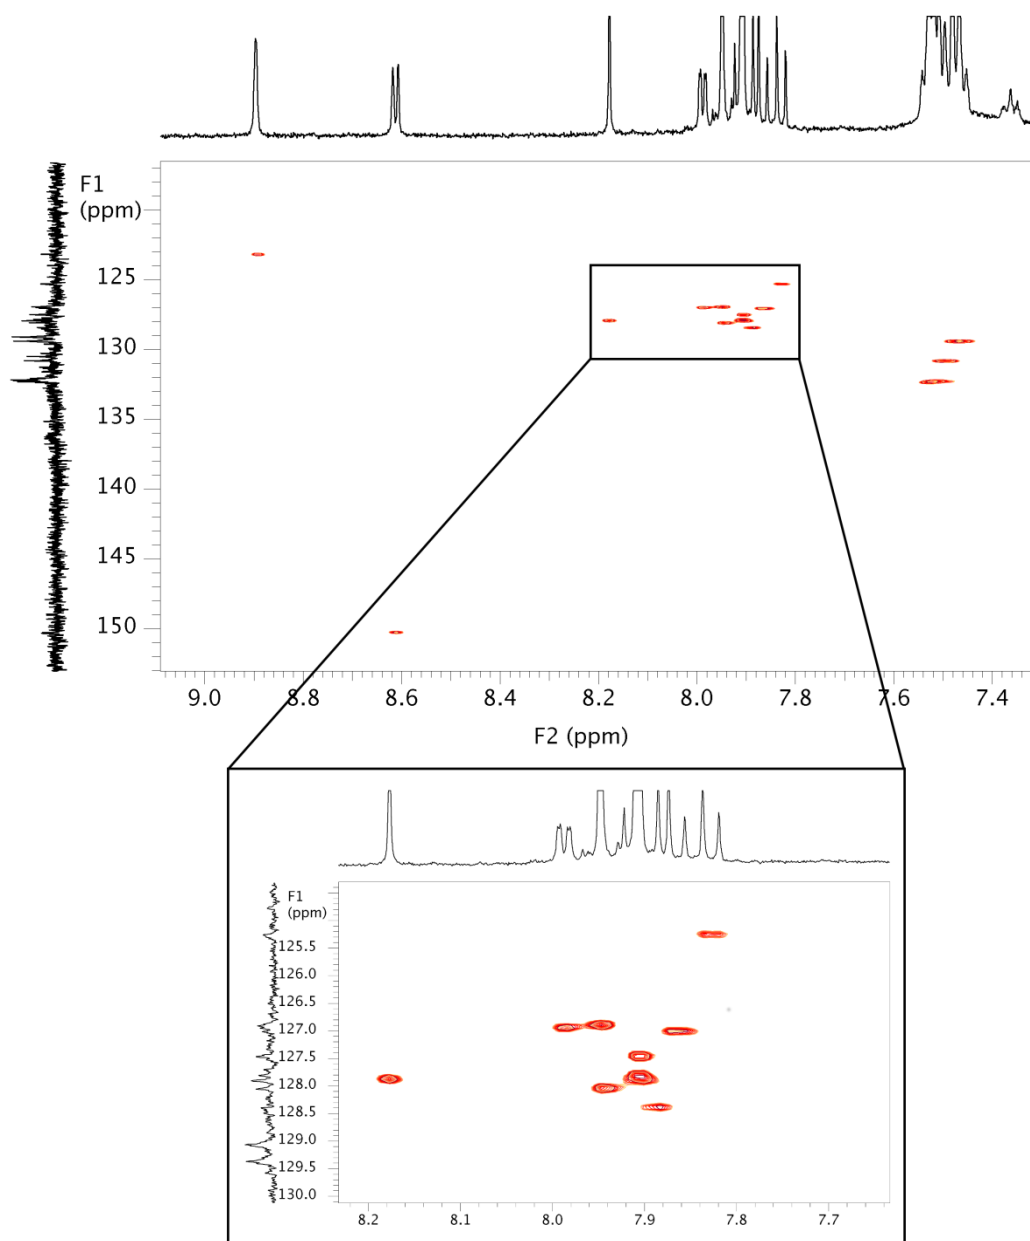

**Figure S 40.**  $^1\text{H}$ - $^{13}\text{C}$  bsgHSQCAD (500 MHz,  $\text{CD}_2\text{Cl}_2$ ) spectrum of complex **Cu1a**.

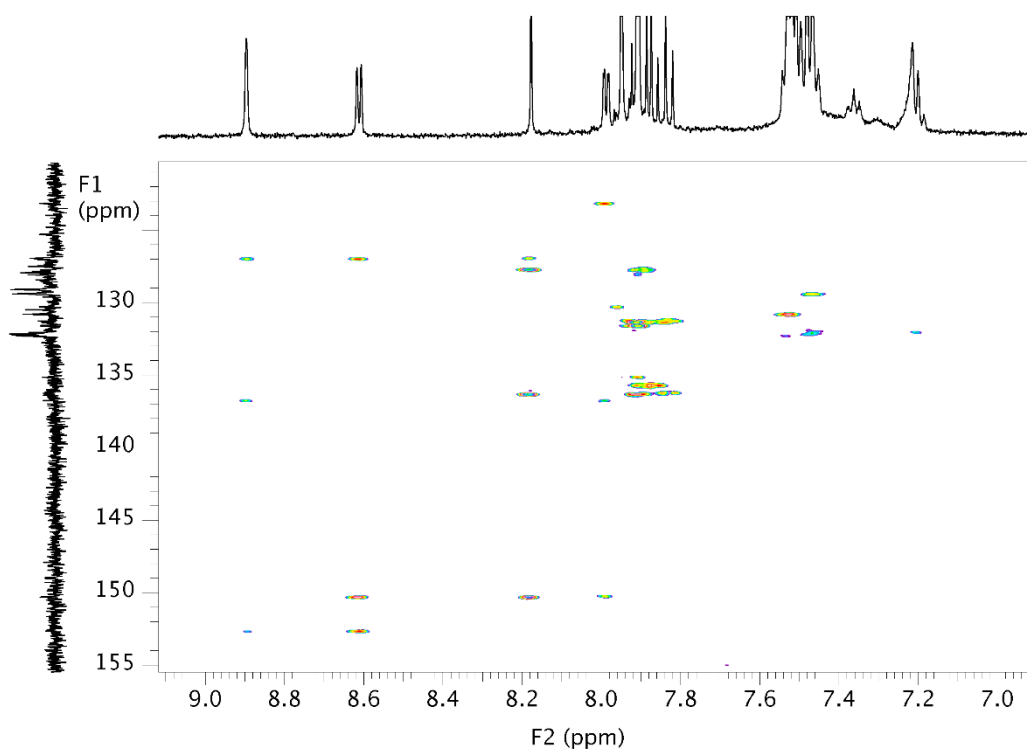

**Figure S 41.**  $^1\text{H}$ - $^{13}\text{C}$  bsgHMBC (500 MHz,  $\text{CD}_2\text{Cl}_2$ ) spectrum of complex **Cu1a**.

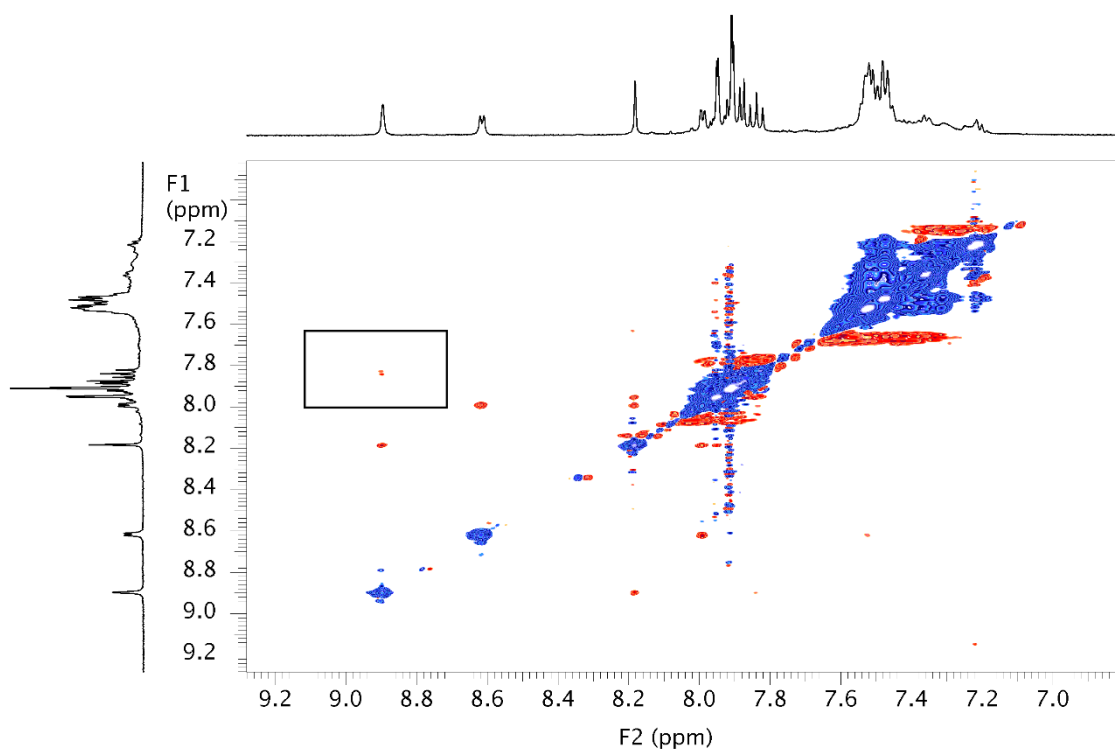

**Figure S 42.**  $^1\text{H}$ - $^1\text{H}$  ROESYAD (500 MHz,  $\text{CD}_2\text{Cl}_2$ ) spectrum of complex **Cu1a**. An interesting correlation is shown between pyridine and corannulene protons ( $\text{H}_3$  and  $\text{H}_8$ , respectively) which allows us to determine the structure of the molecule.



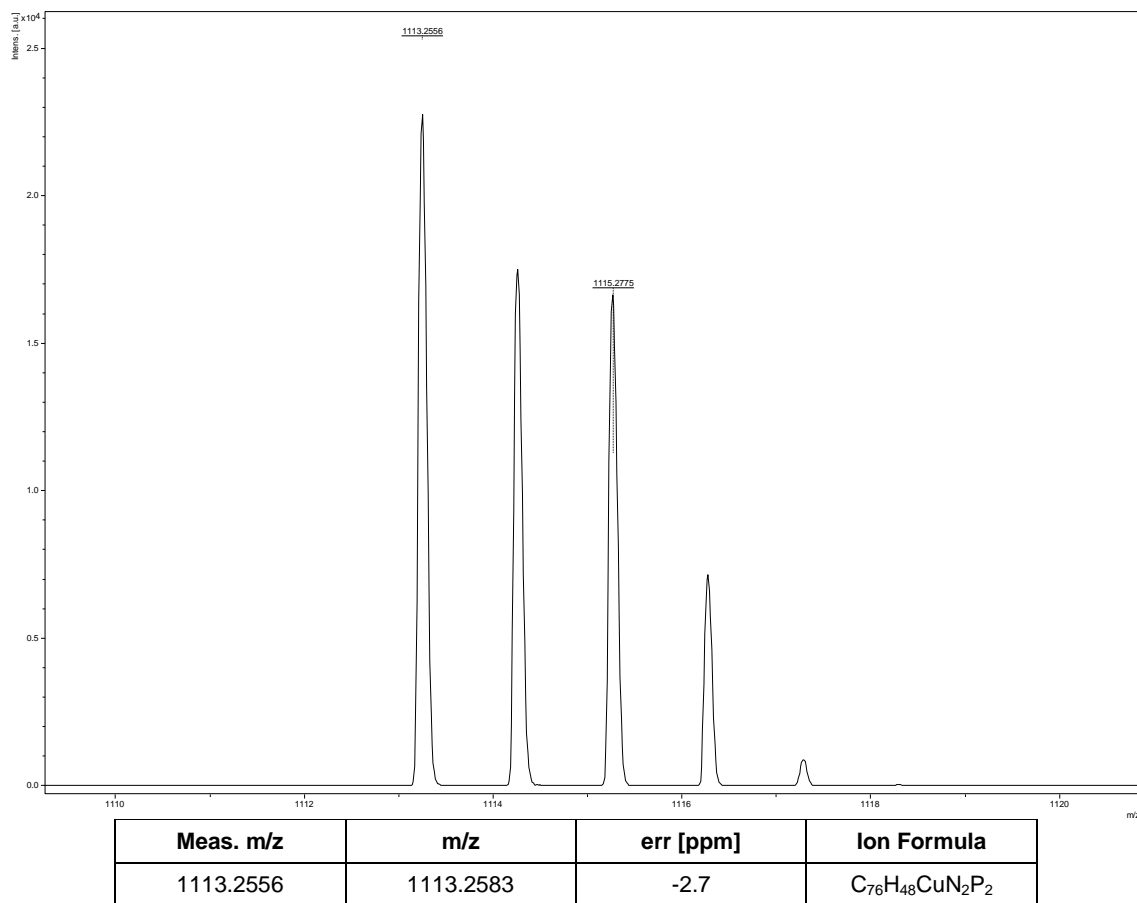

Figure S 43. HRMS (MALDI) of complex **Cu1a** [M]<sup>+</sup>

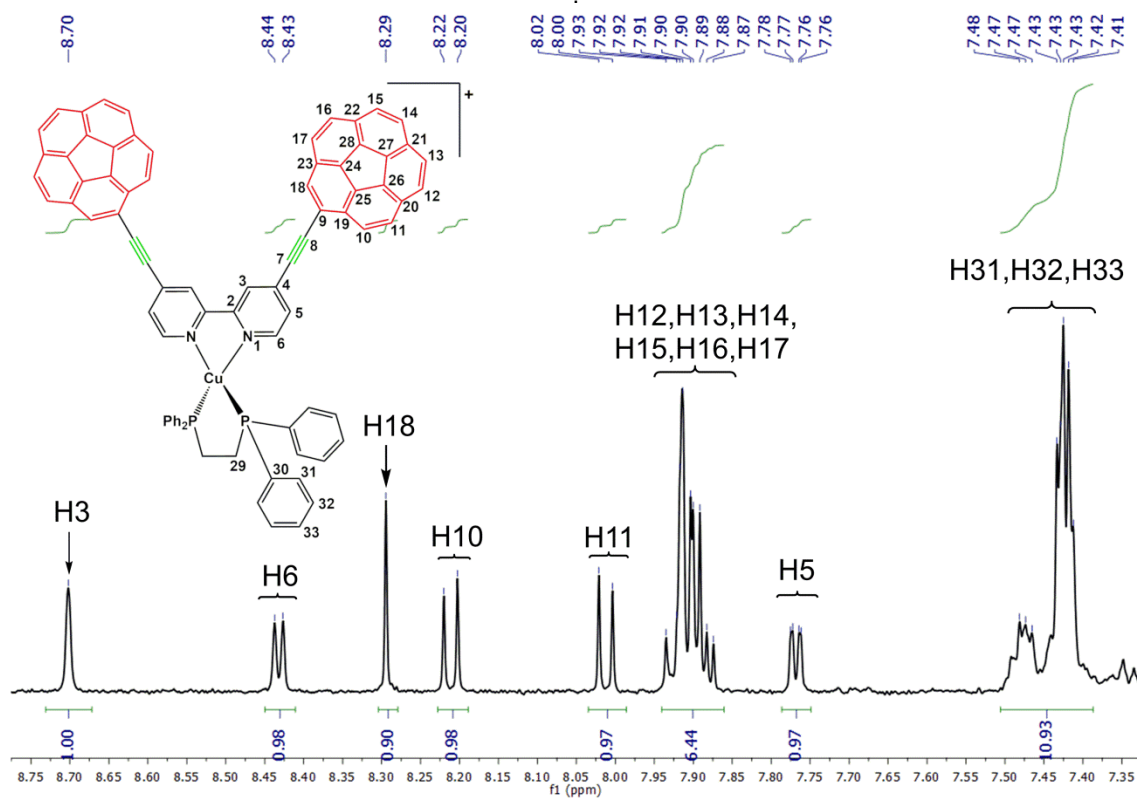

Figure S 44. <sup>1</sup>H-NMR (500 MHz, CD<sub>2</sub>Cl<sub>2</sub>) spectrum of complex **Cu2a**.

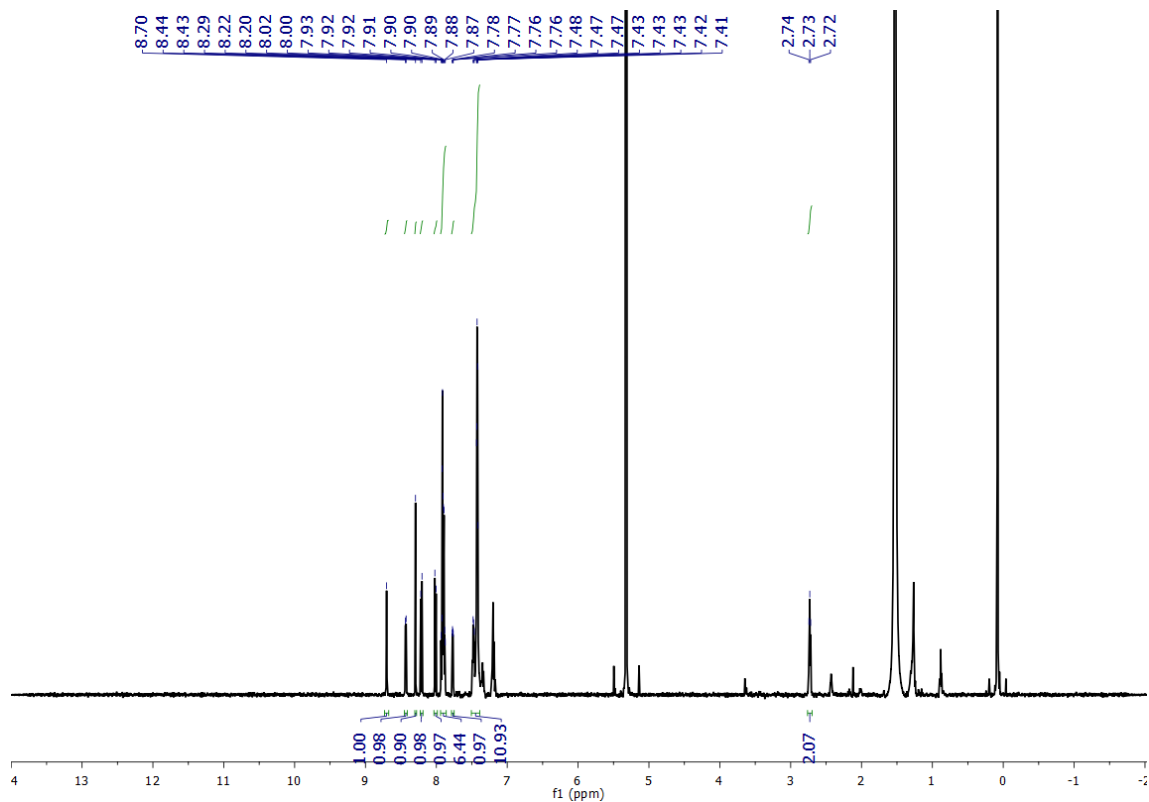

Figure S 45. Full  $^1\text{H}$ -NMR (500 MHz,  $\text{CD}_2\text{Cl}_2$ ) spectrum of complex **Cu2a**.

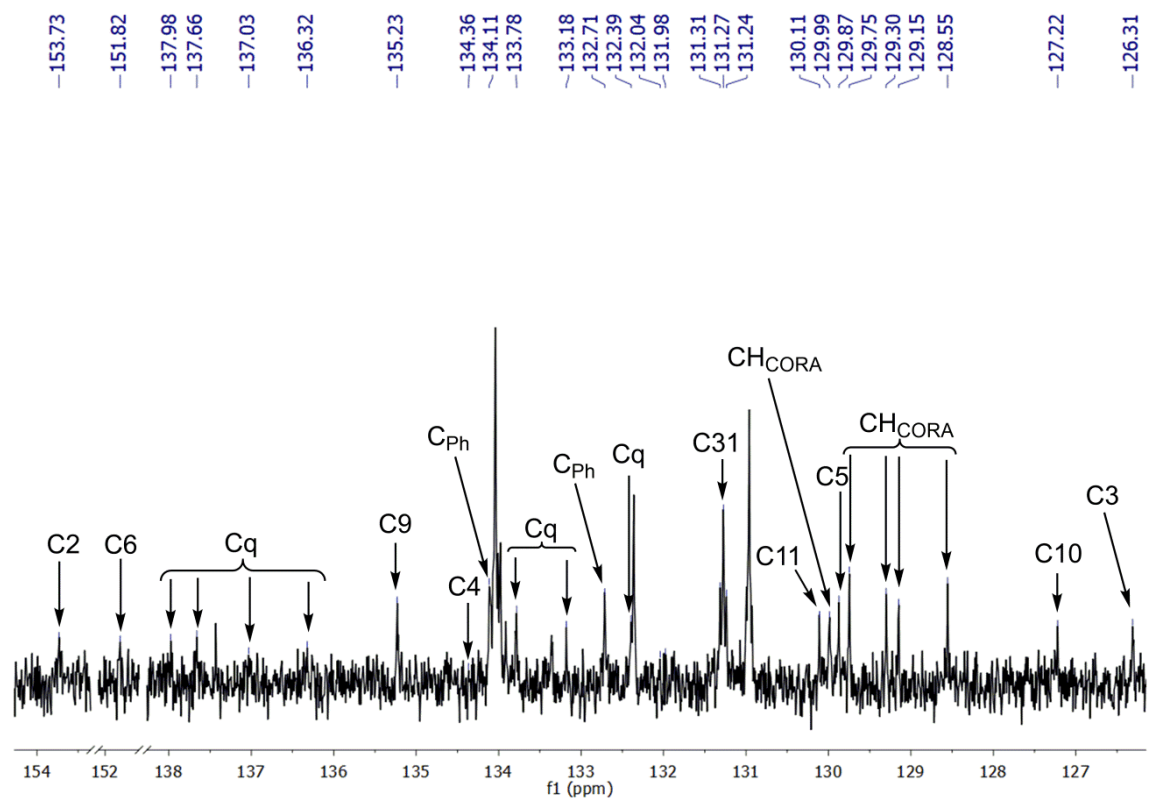

Figure S 46.  $^{13}\text{C}\{^1\text{H}\}$ -NMR (126 MHz,  $\text{CD}_2\text{Cl}_2$ ) spectrum of complex **Cu2a**.

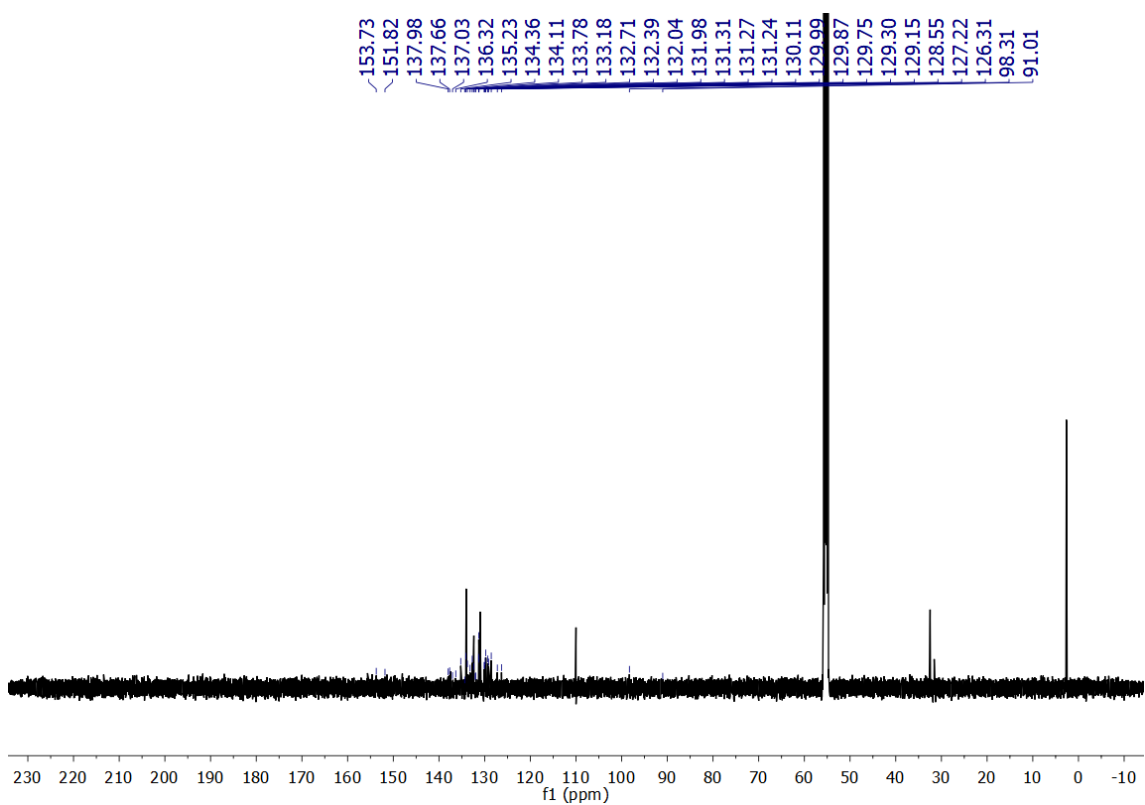

Figure S 47. Full  $^{13}\text{C}\{^1\text{H}\}$ -NMR (126 MHz,  $\text{CD}_2\text{Cl}_2$ ) spectrum of complex **Cu2a**.

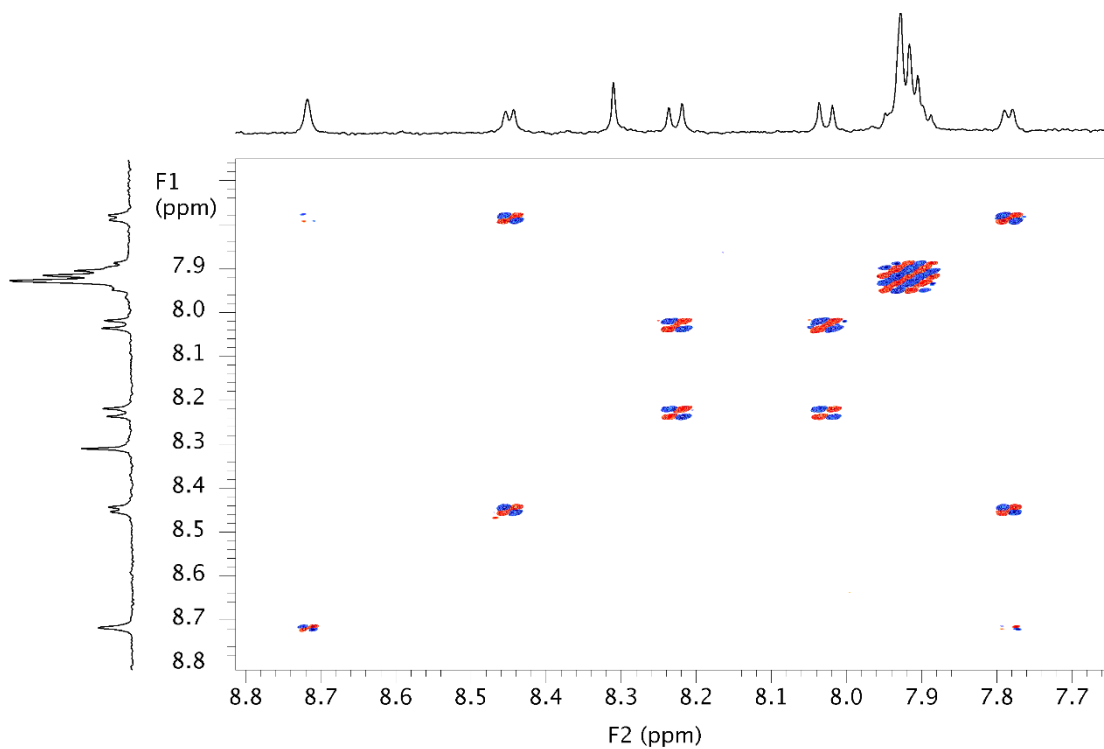

Figure S 48.  $^1\text{H}$ - $^1\text{H}$  gDQFCOSY (500 MHz,  $\text{CD}_2\text{Cl}_2$ ) spectrum of complex **Cu2a**.

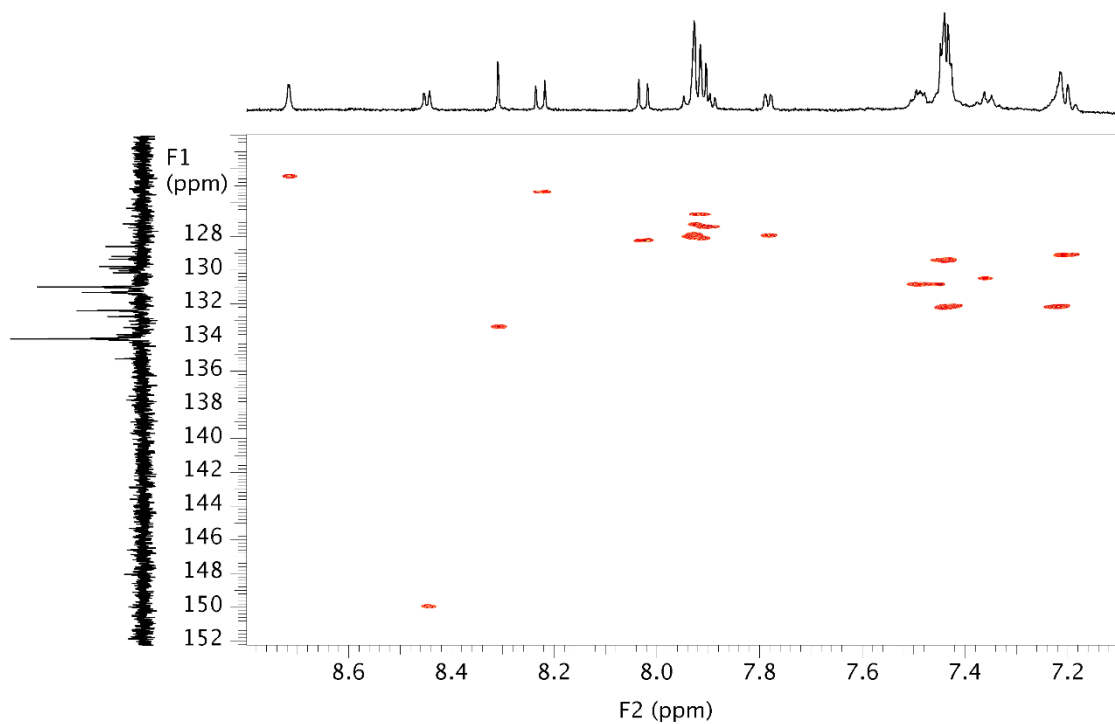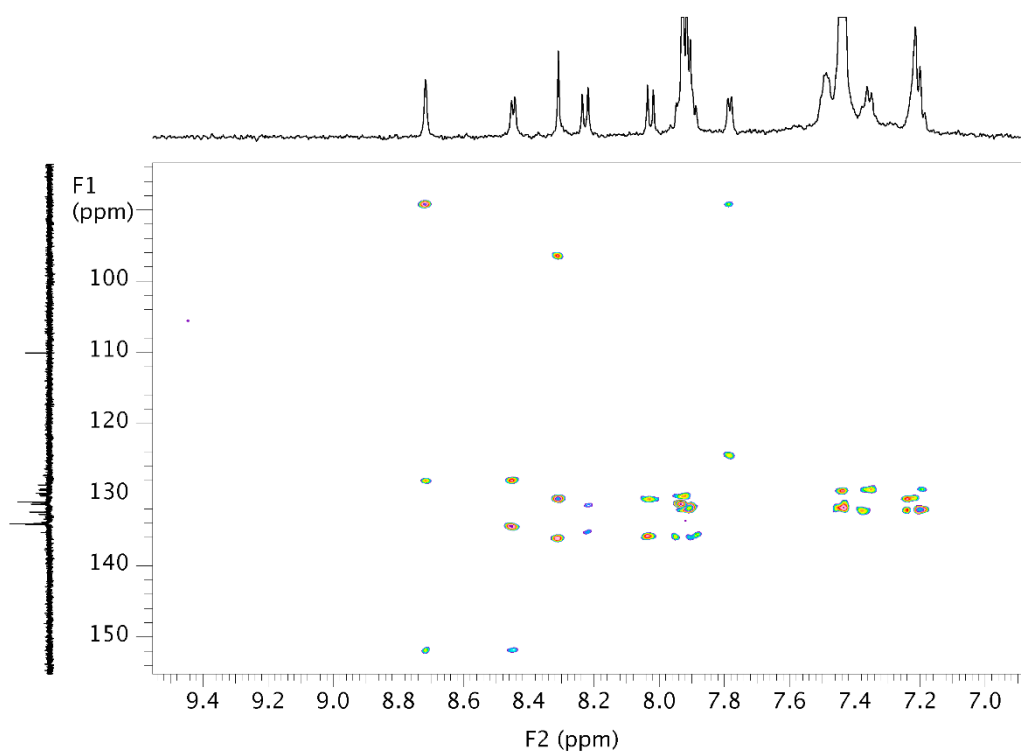

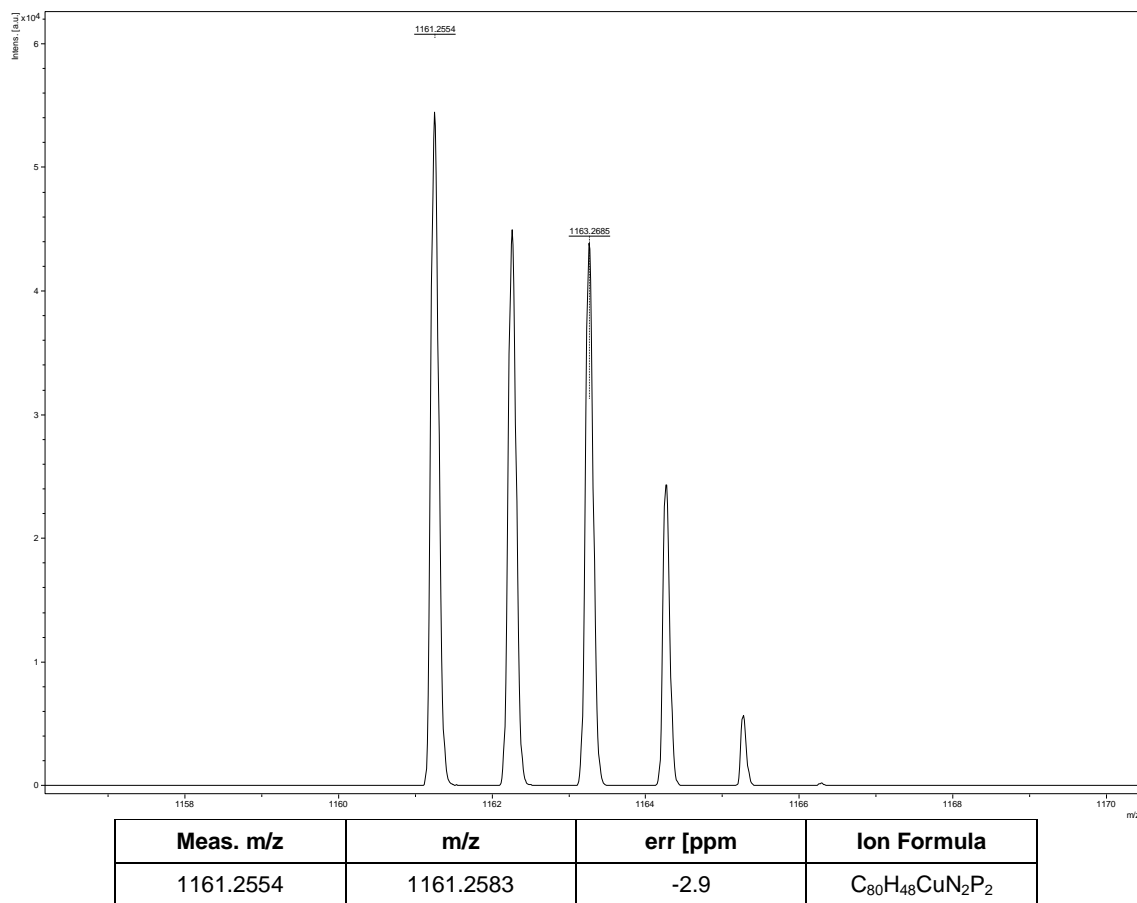

Figure S 51. HRMS (MALDI) of Cu2a [M]<sup>+</sup>.

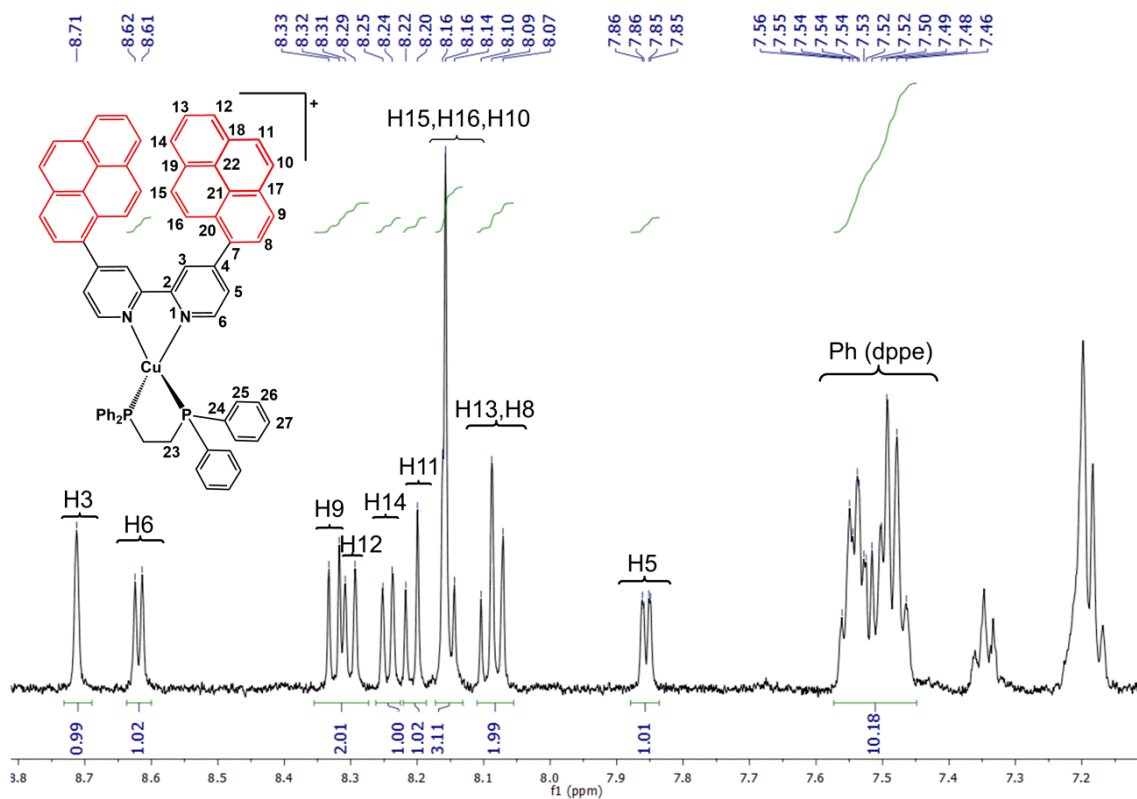

Figure S 52. <sup>1</sup>H-NMR (500 MHz, CD<sub>2</sub>Cl<sub>2</sub>) spectrum of complex Cu1b.

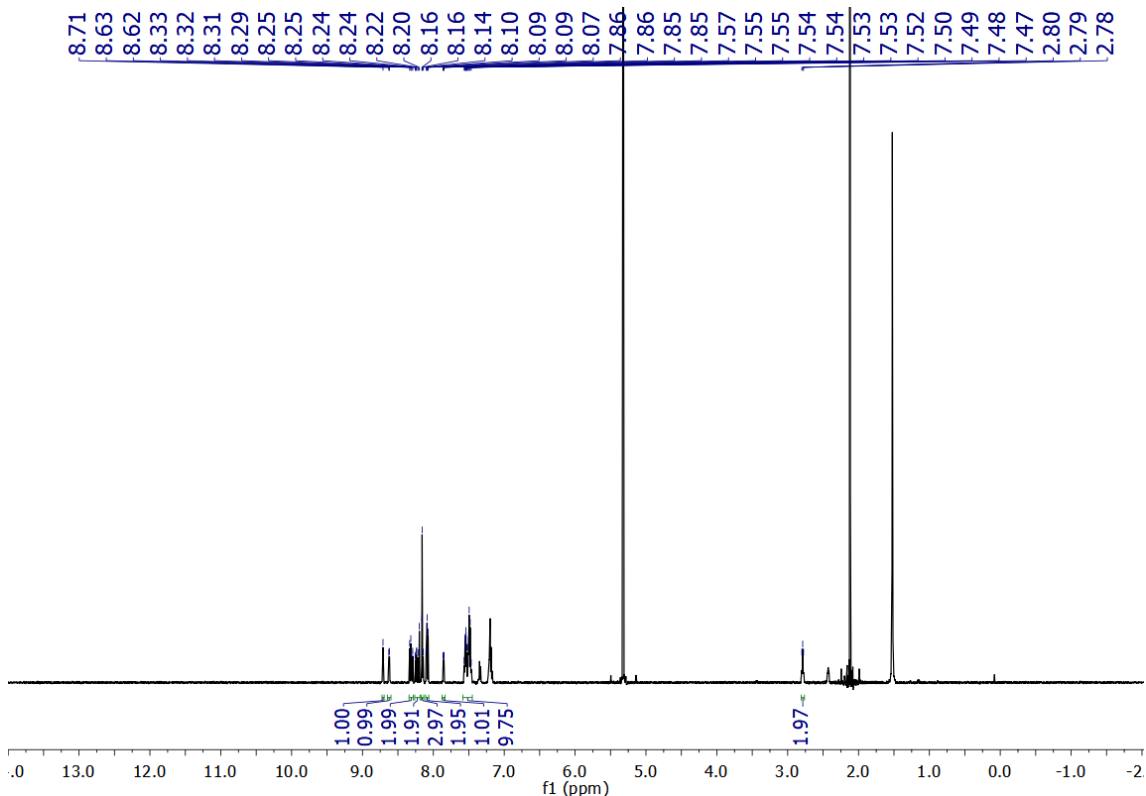

Figure S 53. Full  $^1\text{H}$ -NMR (500 MHz,  $\text{CD}_2\text{Cl}_2$ ) spectrum of complex **Cu1b**.

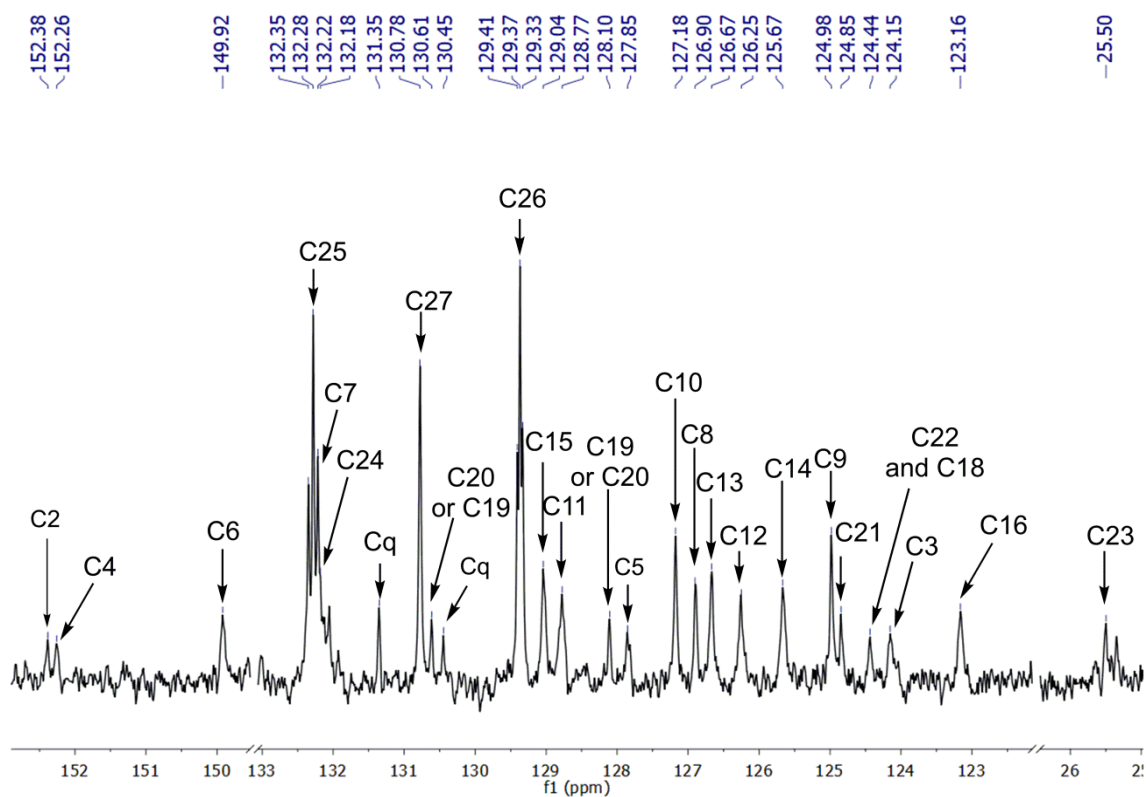

Figure S 54.  $^{13}\text{C}\{^1\text{H}\}$ -NMR (126 MHz,  $\text{CD}_2\text{Cl}_2$ ) spectrum of complex **Cu1b**.

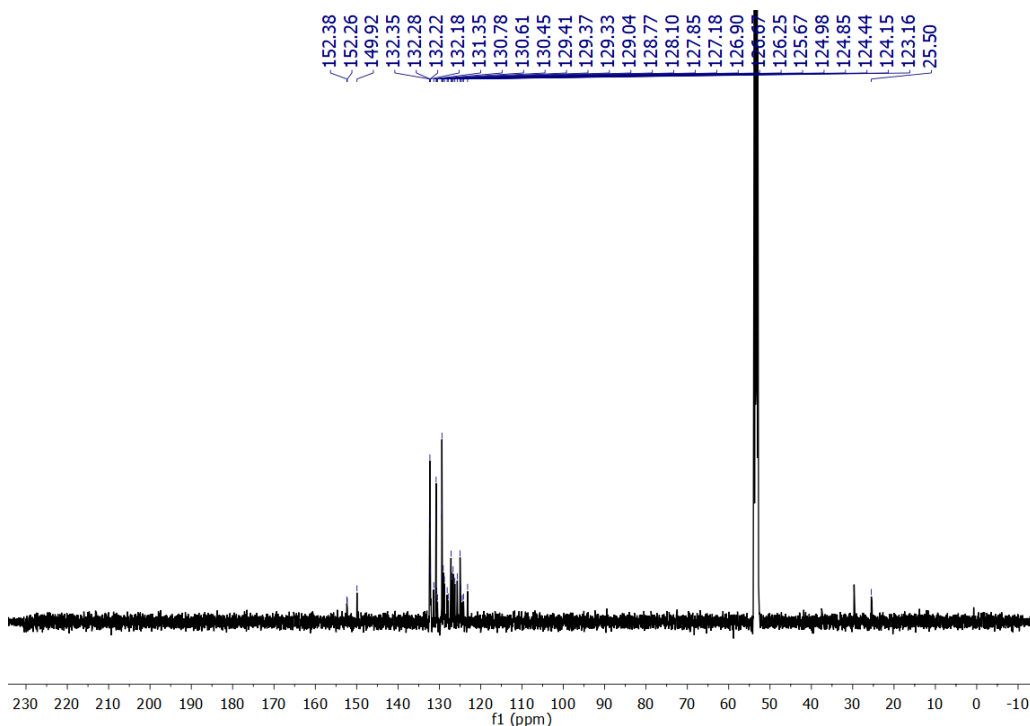

Figure S 55. Full  $^{13}\text{C}\{^1\text{H}\}$ -NMR (126 MHz,  $\text{CD}_2\text{Cl}_2$ ) spectrum of complex **Cu1b**.

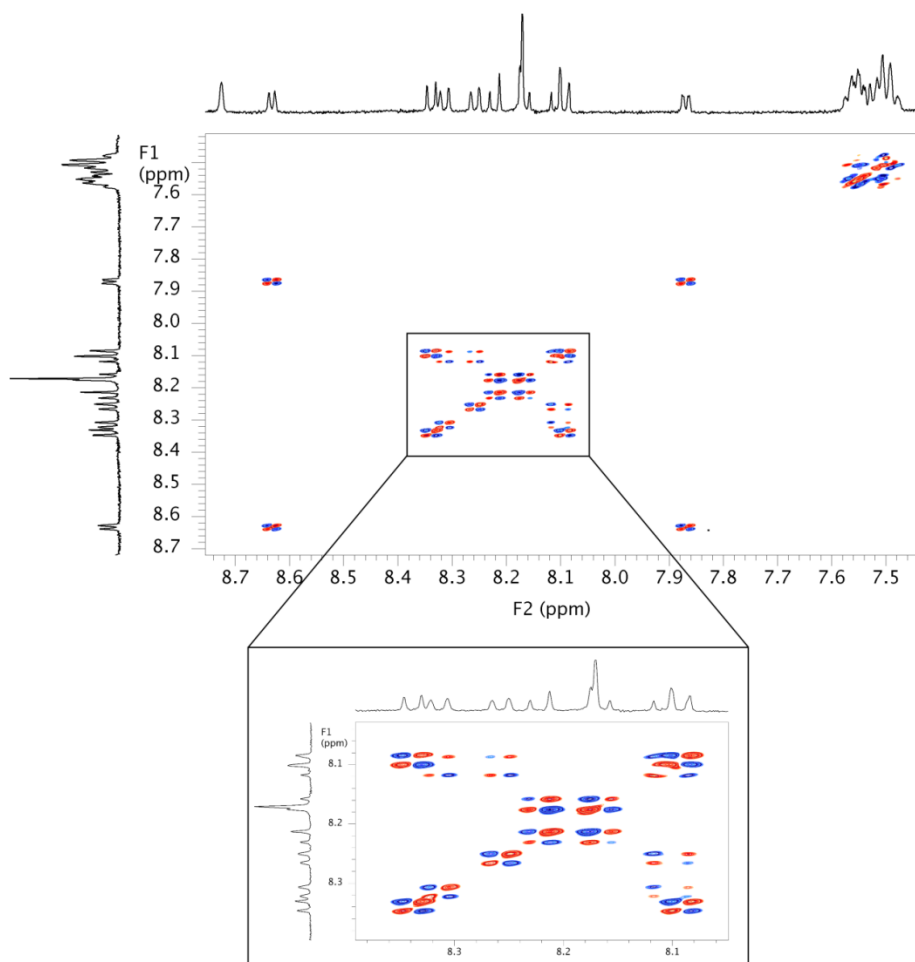

Figure S 56.  $^1\text{H}$ - $^1\text{H}$  gDQFCOSY (500 MHz,  $\text{CD}_2\text{Cl}_2$ ) spectrum of complex **Cu1b**.

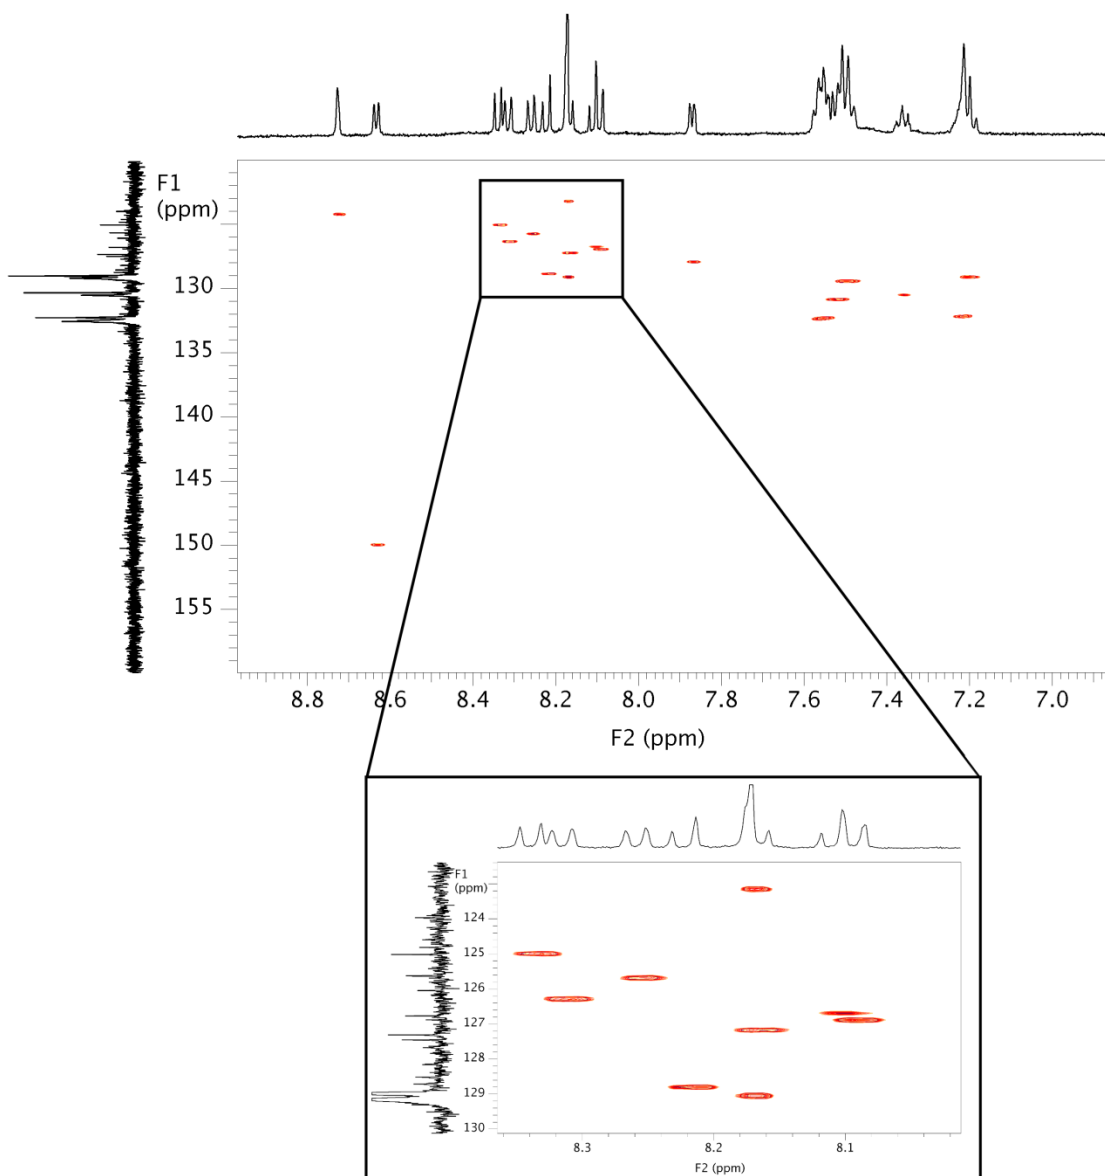

**Figure S 57.**  $^1\text{H}$ - $^{13}\text{C}$  bsgHSQCAD (500 MHz,  $\text{CD}_2\text{Cl}_2$ ) spectrum of complex **Cu1b**.



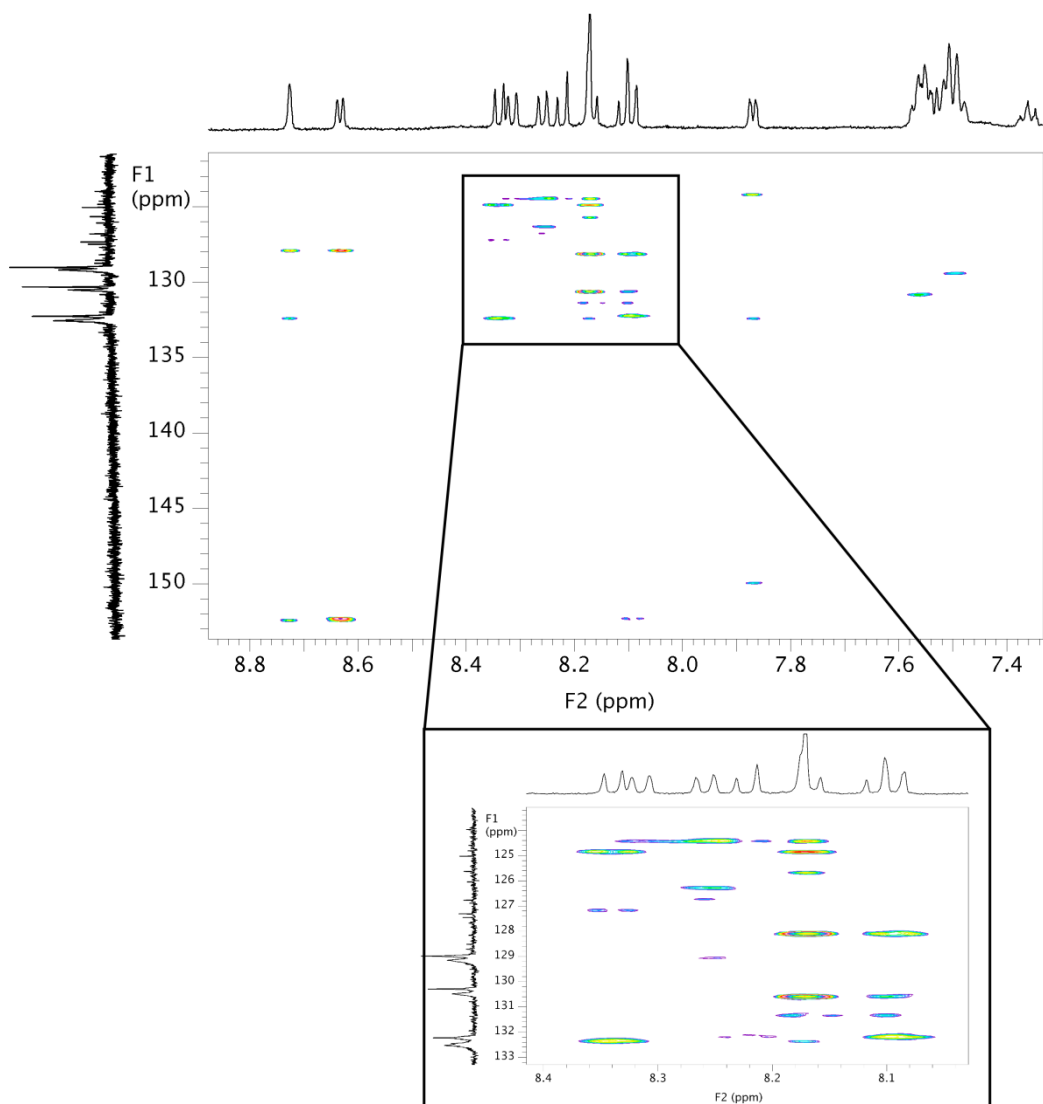

**Figure S 58.**  $^1\text{H}$ - $^{13}\text{C}$  bsgHMBC (500 MHz,  $\text{CD}_2\text{Cl}_2$ ) spectrum of complex **Cu1b**.

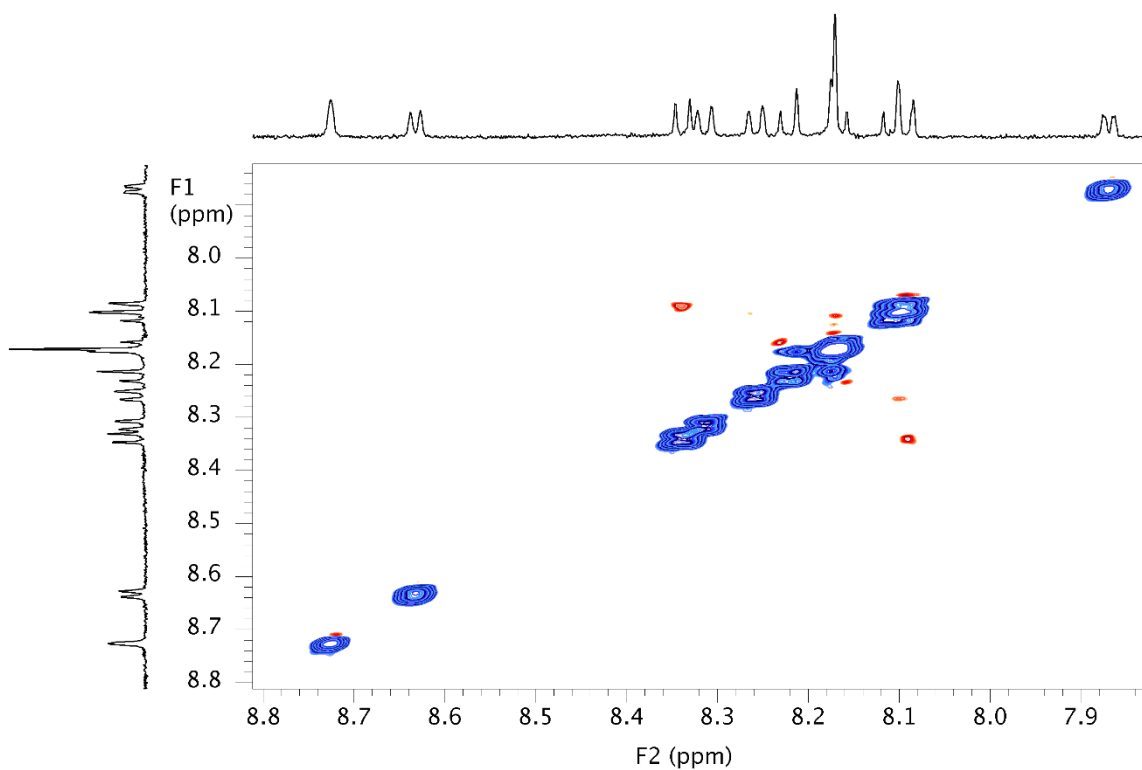

**Figure S 59.**  $^1\text{H}$ - $^1\text{H}$  ROESYAD (500 MHz,  $\text{CD}_2\text{Cl}_2$ ) spectrum of complex **Cu1b**.

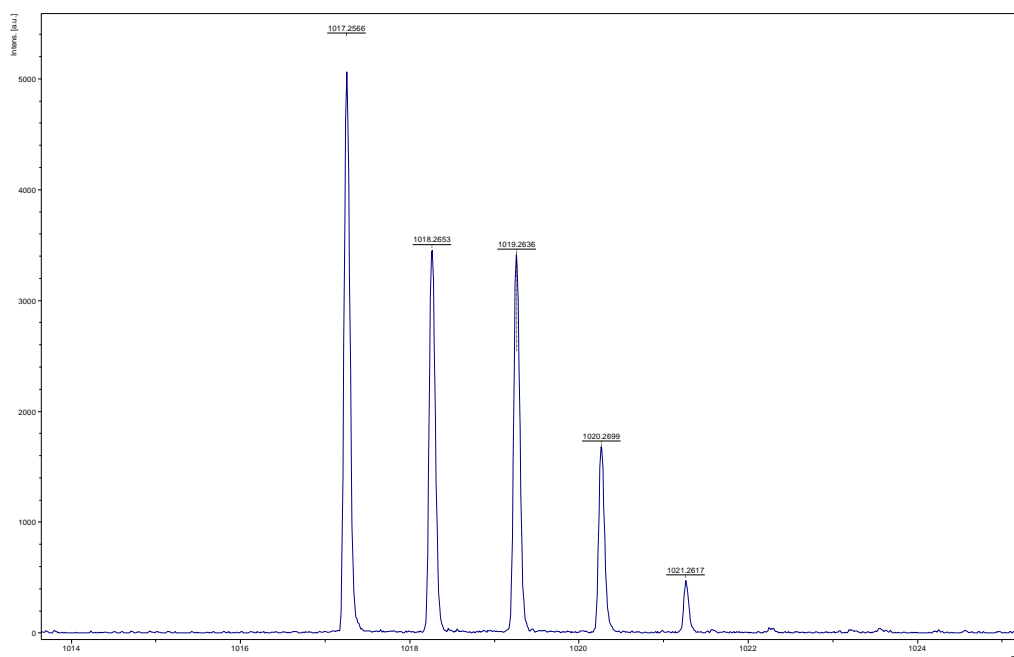

| Meas. m/z | m/z       | err [ppm] | Ion Formula                                        |
|-----------|-----------|-----------|----------------------------------------------------|
| 1017.2566 | 1017.2583 | -1.7      | $\text{C}_{68}\text{H}_{48}\text{CuN}_2\text{P}_2$ |

**Figure S 60.** HRMS (MALDI) of complex **Cu1b**  $[\text{M}]^+$ .

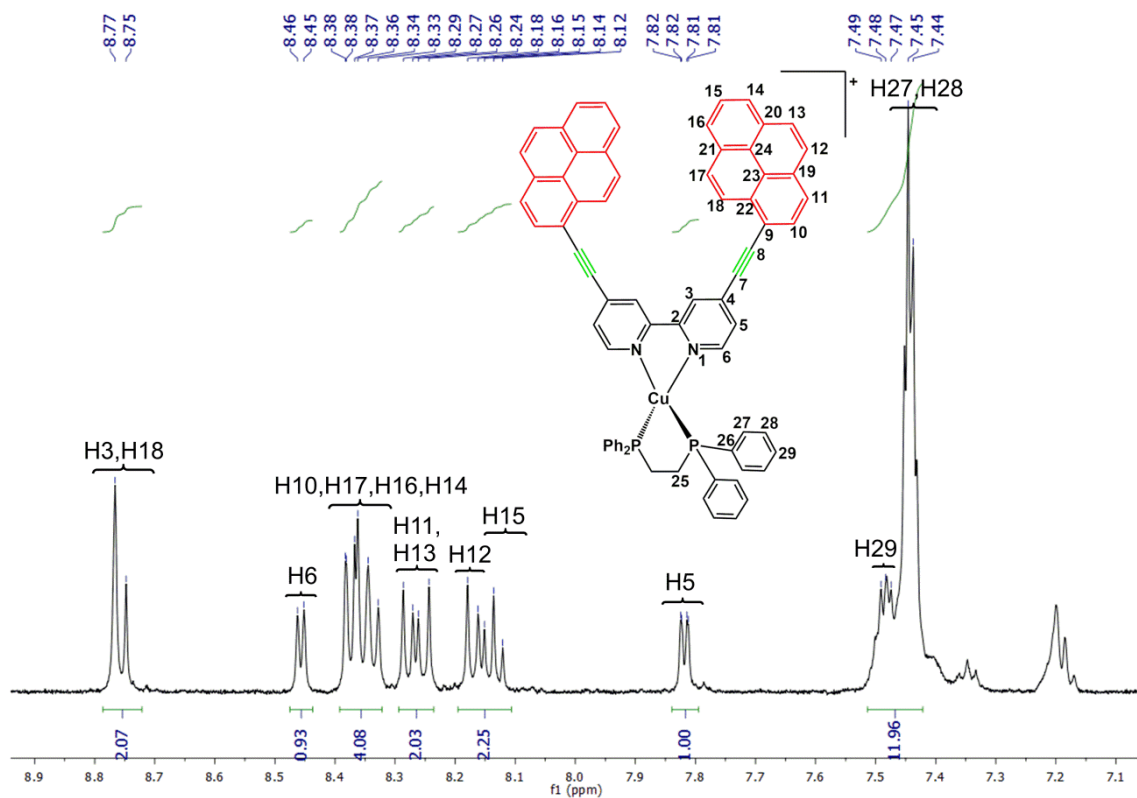

Figure S 61. <sup>1</sup>H-NMR (500 MHz, CD<sub>2</sub>Cl<sub>2</sub>) spectrum of complex Cu2b.

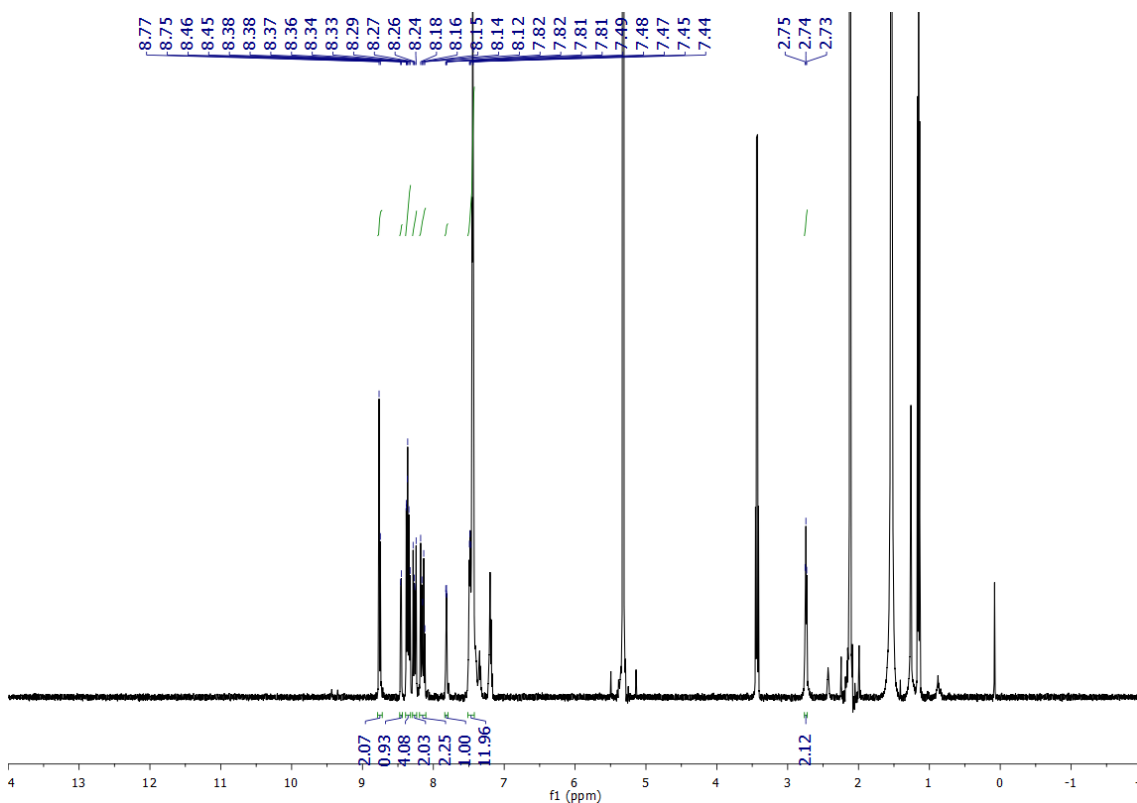

Figure S 62. Full <sup>1</sup>H-NMR (500 MHz, CD<sub>2</sub>Cl<sub>2</sub>) spectrum of complex Cu2b.

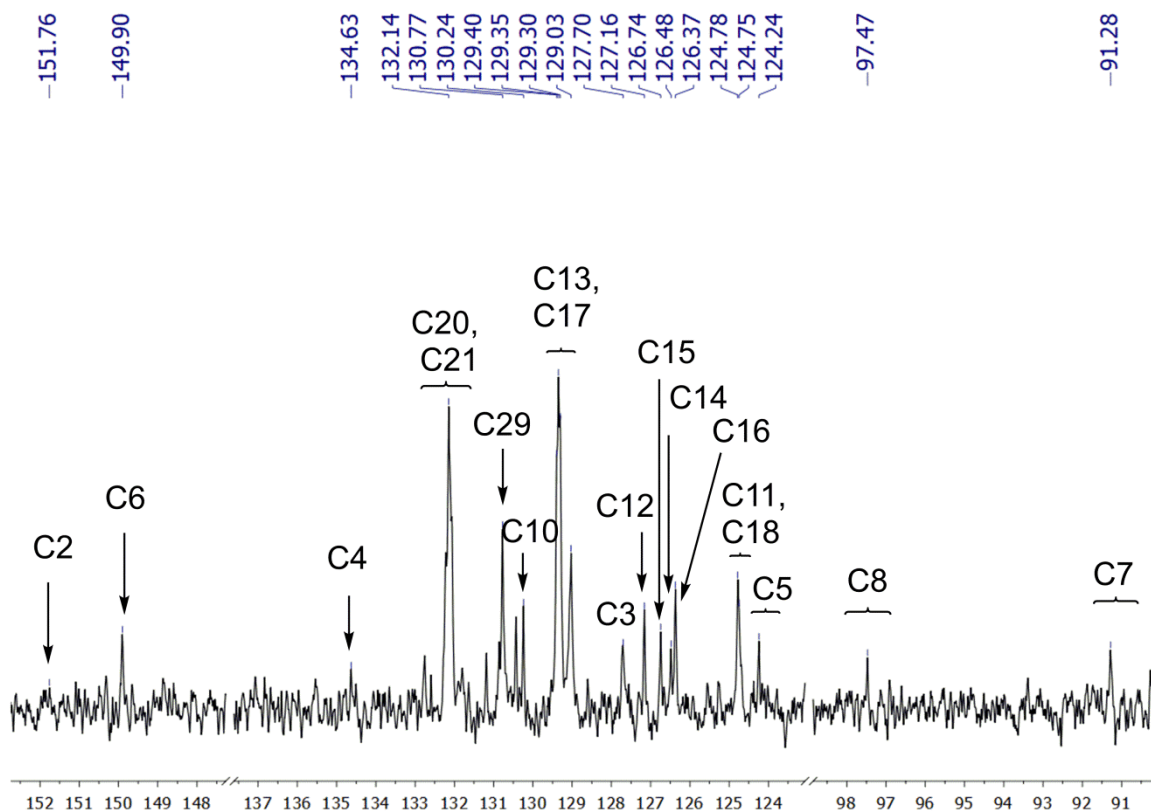

Figure S 63.  $^{13}\text{C}\{^1\text{H}\}$ -NMR (101 MHz,  $\text{CD}_2\text{Cl}_2$ ) spectrum of complex **Cu2b**.

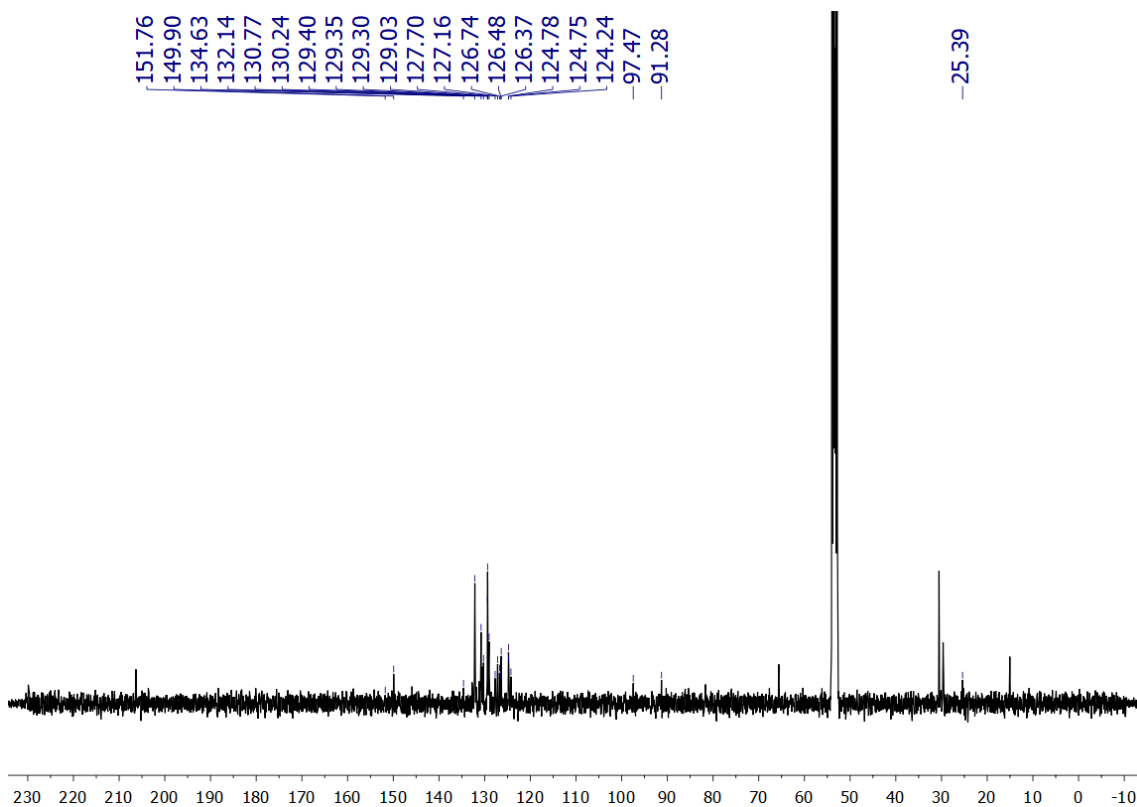

Figure S 64. Full  $^{13}\text{C}\{^1\text{H}\}$ -NMR (101 MHz,  $\text{CD}_2\text{Cl}_2$ ) spectrum of complex **Cu2b**.

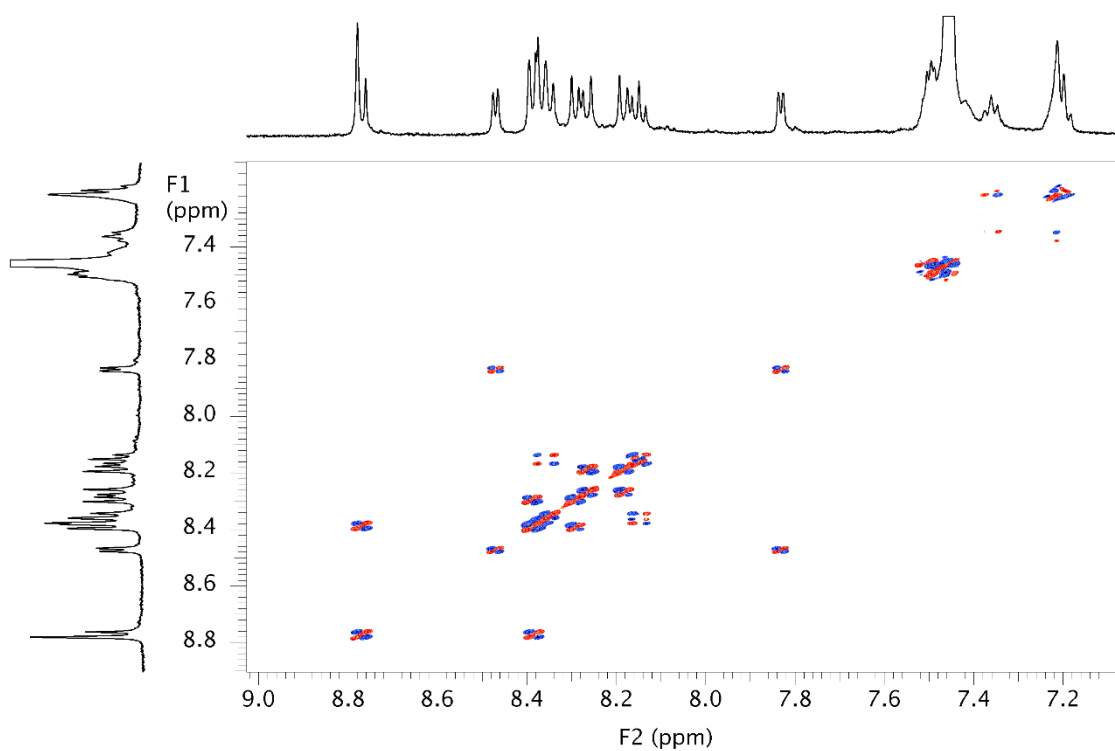

**Figure S 65.**  $^1\text{H}$ - $^1\text{H}$  gDQFCOSY (500 MHz,  $\text{CD}_2\text{Cl}_2$ ) spectrum of complex **Cu2b**.

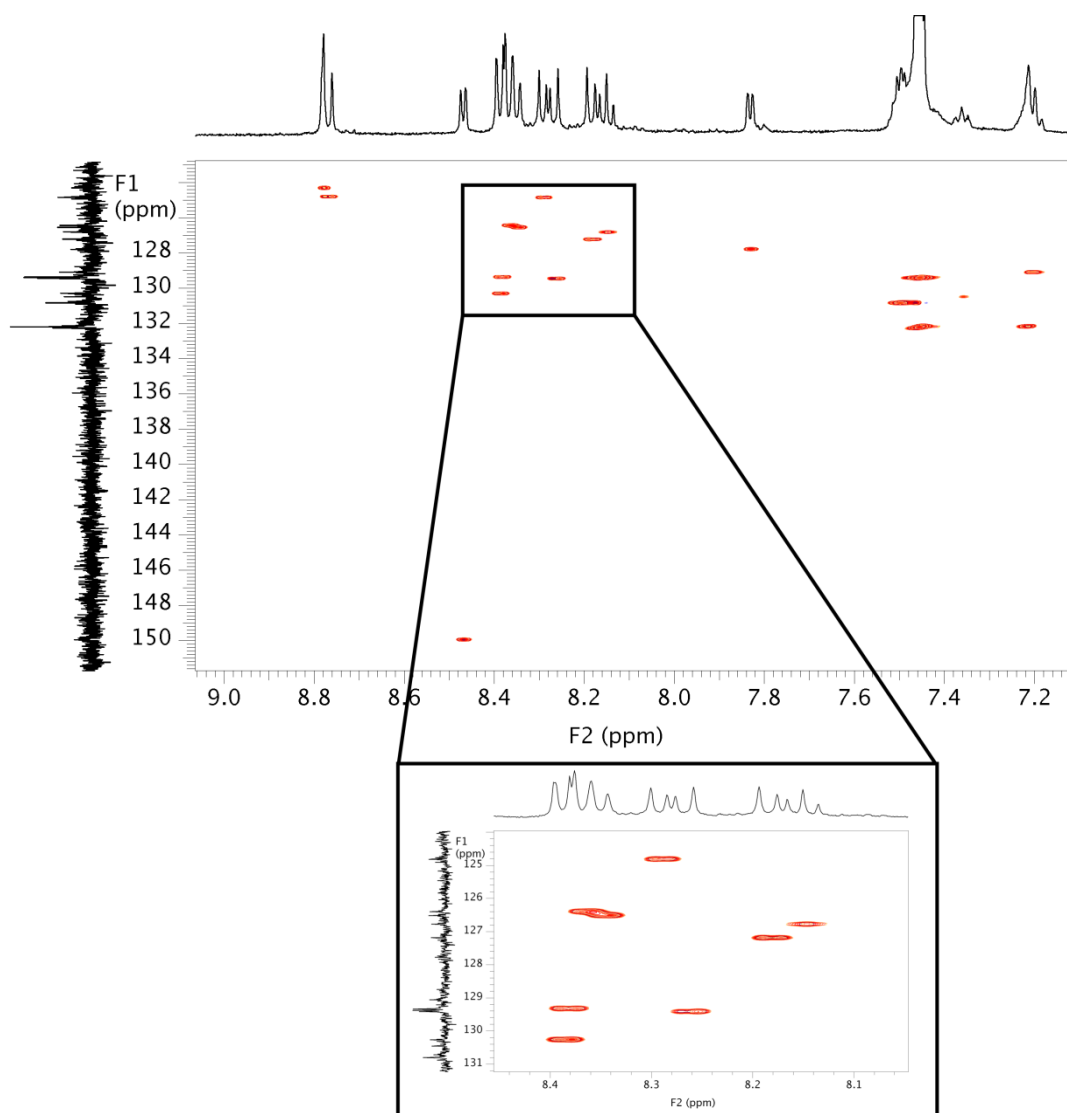

**Figure S 66.**  $^1\text{H}$ - $^{13}\text{C}$  bsgHSQCAD (500 MHz,  $\text{CD}_2\text{Cl}_2$ ) spectrum of complex **Cu2b**.

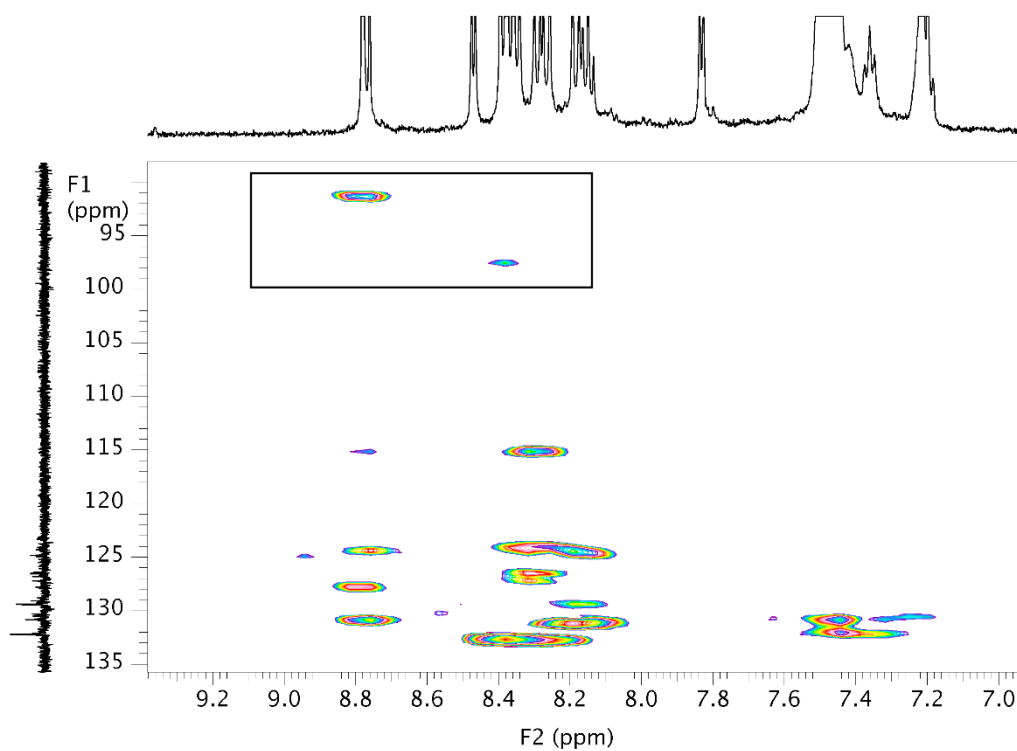

**Figure S 67.**  $^1\text{H}$ - $^{13}\text{C}$  g2cHMBC (500 MHz,  $\text{CD}_2\text{Cl}_2$ ) spectrum of **Cu2b**. In this experiment, carbons  $\text{C}_7$  and  $\text{C}_8$  have been determined by cross peaks with protons from bipyridine ( $\text{H}_3$ ) and pyrene ( $\text{H}_{11}$ ) moieties.

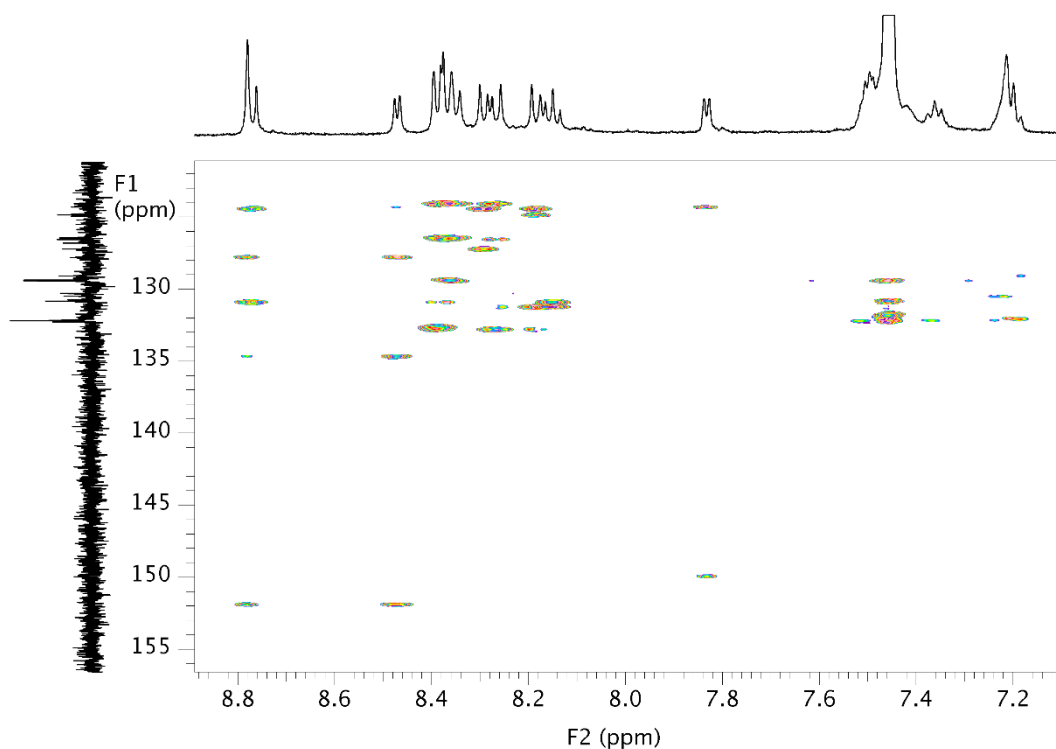

**Figure S 68.**  $^1\text{H}$ - $^{13}\text{C}$  bsgHMBC (500 MHz,  $\text{CD}_2\text{Cl}_2$ ) spectrum of complex **Cu2b**.

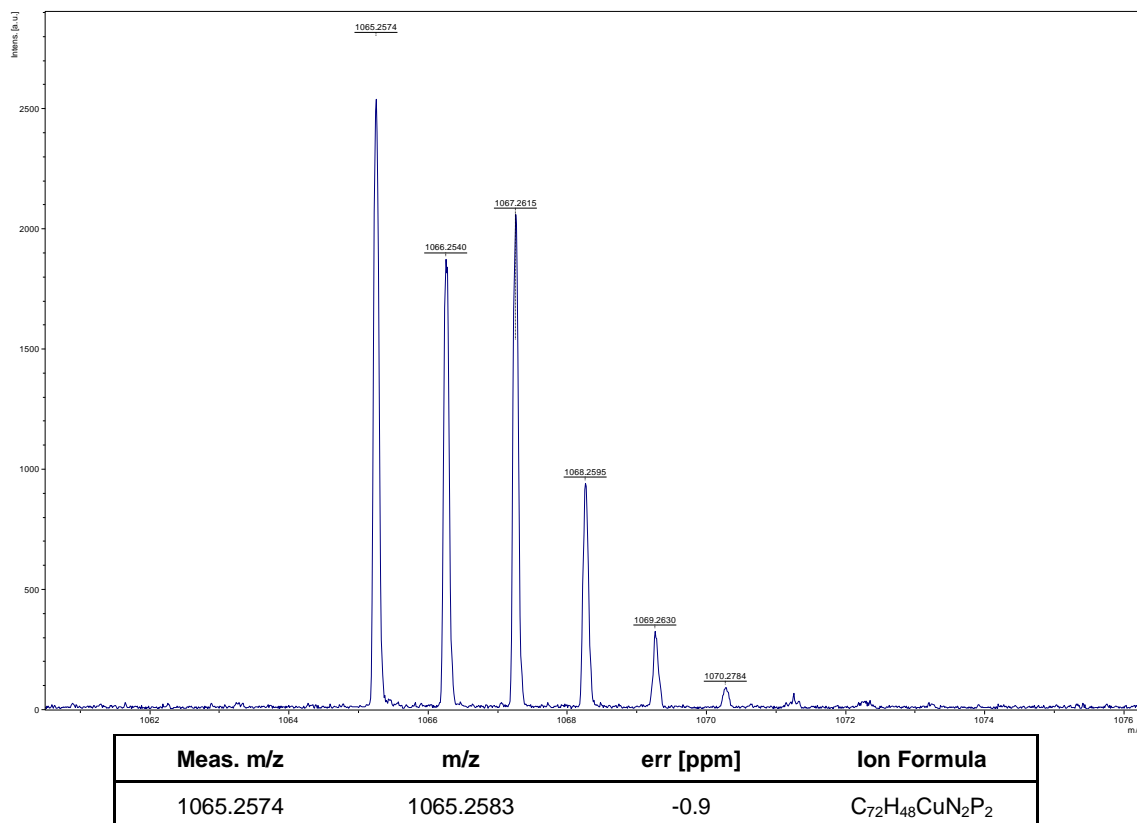

Figure S 69. HRMS (MALDI) of complex **Cu2b** [M]<sup>+</sup>.

## UV-Vis absorption and emission spectra

Spectra of complexes **Cu1a** and **Cu2a** show the expected intraligand  $\pi$ - $\pi^*$  transition bands in the range 270 nm–370 nm with attenuation coefficients of  $3.2 \cdot 10^4 \text{ M}^{-1}\text{cm}^{-1}$  –  $6.6 \cdot 10^4 \text{ M}^{-1}\text{cm}^{-1}$  and <sup>1</sup>MLCT bands in the range 375 nm–550 nm with moderate intensity ( $\epsilon = 4.9 \cdot 10^3 \text{ M}^{-1}\text{cm}^{-1}$  –  $7.5 \cdot 10^3 \text{ M}^{-1}\text{cm}^{-1}$ ) (Figure S 70).<sup>6–8</sup>

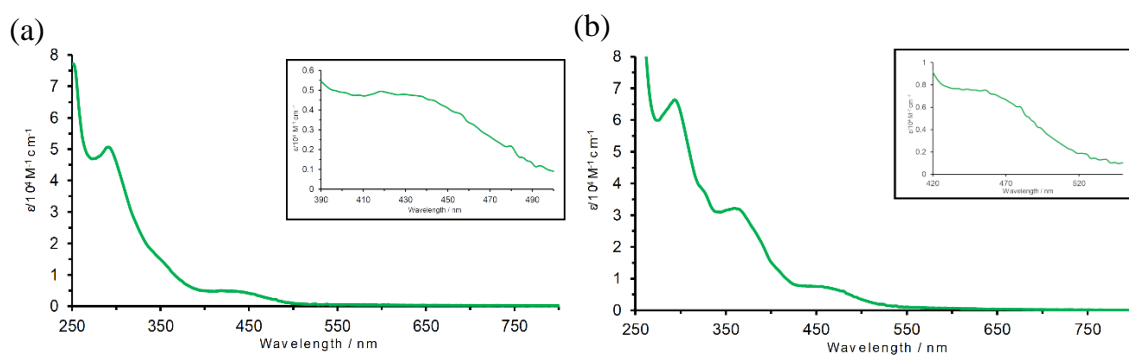

Figure S 70. UV-Vis absorption spectra of complexes (a) **Cu1a** ( $10^{-5} \text{ M}$ ) and (b) **Cu2a** ( $10^{-5} \text{ M}$ ) in dichloromethane. Inset: magnified spectrum in the region between (a) 390 nm and 500 nm, and (b) 420 and 550 nm.



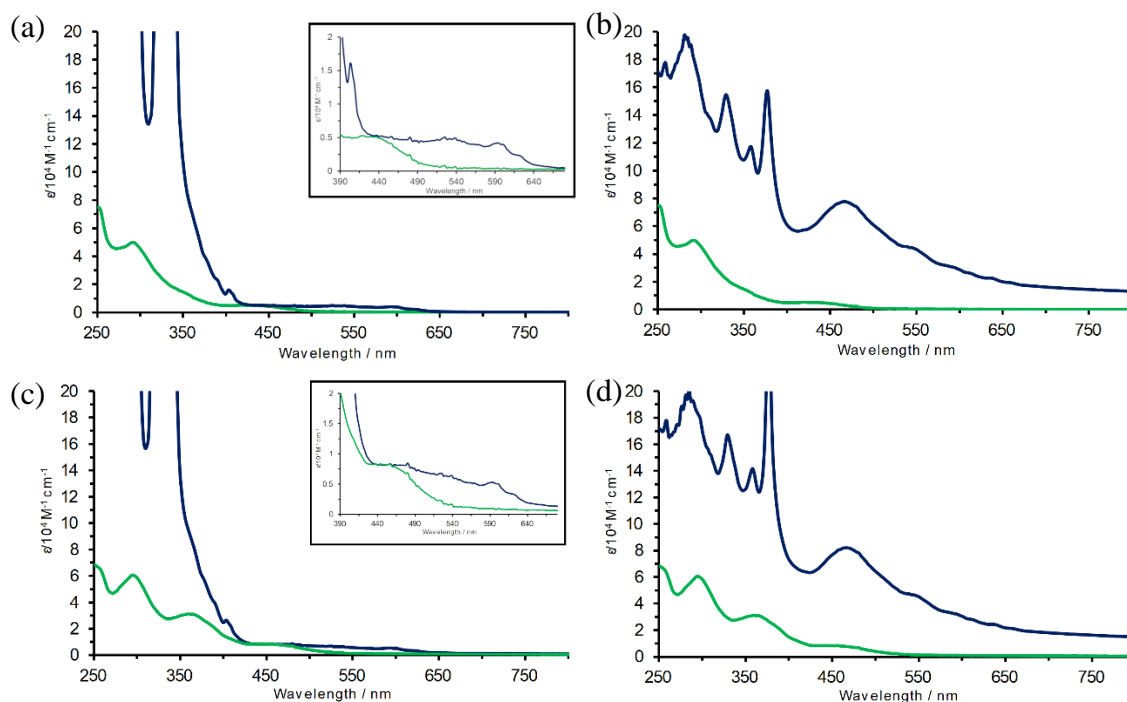

**Figure S 71.** UV-Vis absorption spectra in dichloromethane of: (a) complex **Cu1a** ( $1.7 \cdot 10^{-5}$  M, in green) and its mixture with  $C_{60}$  ( $8.3 \cdot 10^{-5}$  M, 5 eq, in blue); (b) complex **Cu1a** ( $1.7 \cdot 10^{-5}$  M, in green) and its mixture with  $C_{70}$  ( $8.3 \cdot 10^{-5}$  M, 5 eq, in blue); (c) complex **Cu2a** ( $1.7 \cdot 10^{-5}$  M, in green) and its mixture with  $C_{60}$  ( $8.3 \cdot 10^{-5}$  M, 5 eq, in blue); (d) complex **Cu2a** ( $1.7 \cdot 10^{-5}$  M, in green) and its mixture with  $C_{70}$  ( $8.3 \cdot 10^{-5}$  M, 5 eq, in blue). Insets in spectra (a) and (c) correspond to the magnified region of  $^1MLCT$  transition band.

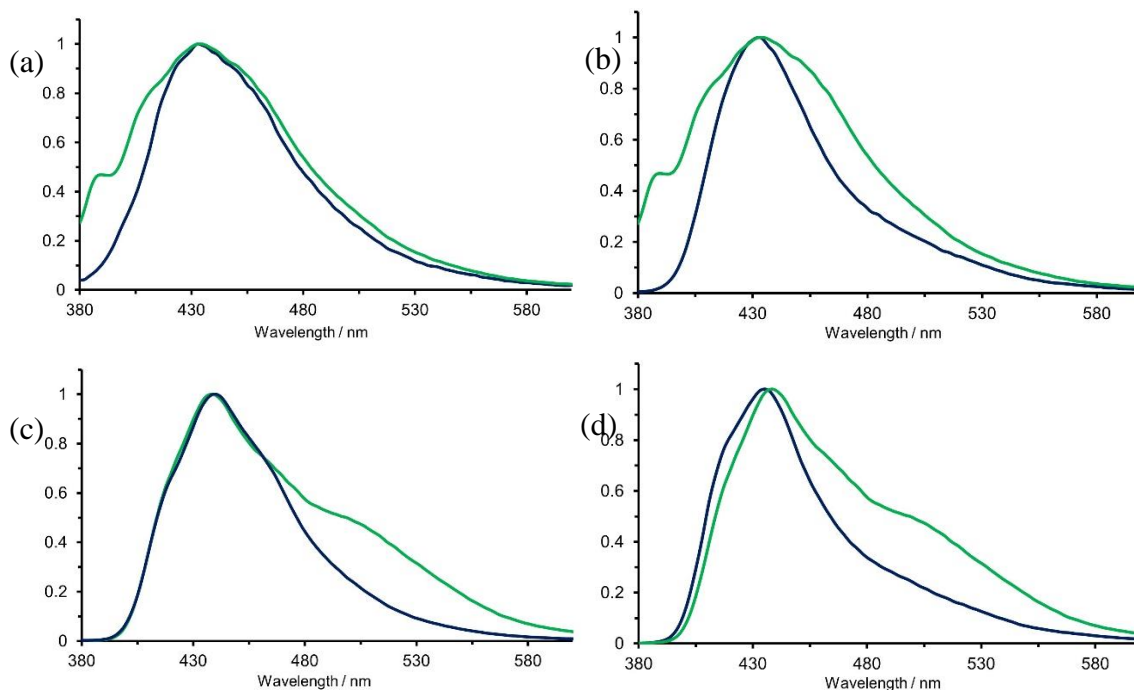

**Figure S 72.** Emission spectra ( $\lambda_{exc} = 350$  nm) in dichloromethane of: (a) complex **Cu1a** ( $1.7 \cdot 10^{-5}$  M, in green) and its mixture with  $C_{60}$  ( $8.3 \cdot 10^{-5}$  M, 5 eq, in blue); (b) complex **Cu1a** ( $1.7 \cdot 10^{-5}$  M, in green) and its mixture with  $C_{70}$  ( $8.3 \cdot 10^{-5}$  M, 5 eq, in blue); (c) complex **Cu2a** ( $1.7 \cdot 10^{-5}$  M, in green) and its mixture with  $C_{60}$  ( $8.3 \cdot 10^{-5}$  M, 5 eq, in blue); (d) complex **Cu2a** ( $1.7 \cdot 10^{-5}$  M, in green) and its mixture with  $C_{70}$  ( $8.3 \cdot 10^{-5}$  M, 5 eq, in blue).

## Cyclic voltammograms

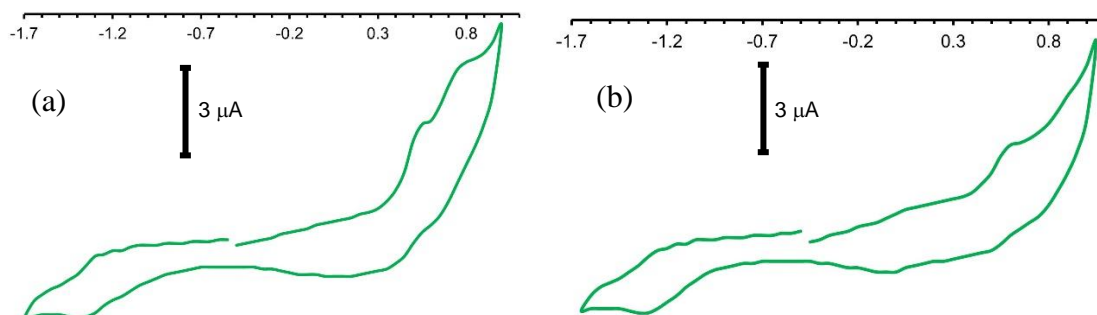

**Figure S 73.** Cyclic voltammograms of **Cu1a** (a) and **Cu2a** (b) in deaerated dichloromethane at a concentration of  $10^{-5}$  M containing a solution of  $\text{NBu}_4\text{PF}_6$  (0.1 M). Scan rate of  $100 \text{ mV} \cdot \text{s}^{-1}$ . Potentials are referenced against  $\text{Fc}/\text{Fc}^+$ .

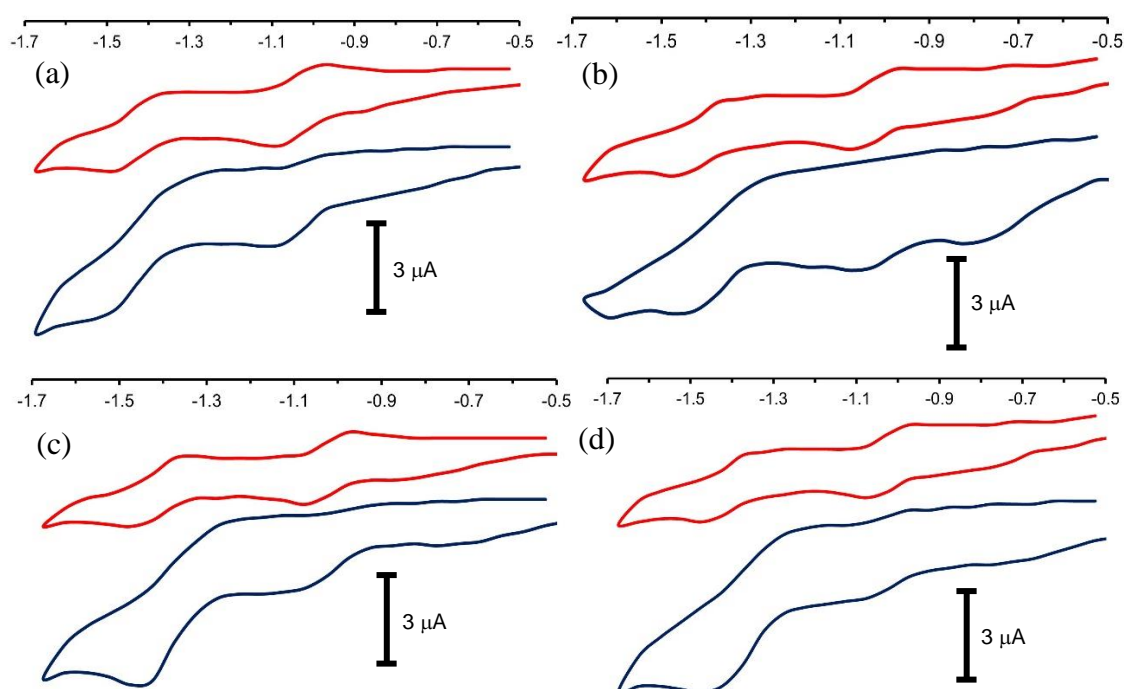

**Figure S 74.** Cathodic side of cyclic voltammograms in deaerated dichloromethane showing reduction processes of: (a) pristine  $\text{C}_{60}$  ( $5 \cdot 10^{-5}$  M, in red) and its mixture with **Cu1a** ( $10^{-5}$  M, in blue); (b) pristine  $\text{C}_{70}$  ( $5 \cdot 10^{-5}$  M, in red) and its mixture with **Cu1a** ( $10^{-5}$  M, in blue); (c) pristine  $\text{C}_{60}$  ( $5 \cdot 10^{-5}$  M, in red) and its mixture with **Cu2a** ( $10^{-5}$  M, in blue); (d) pristine  $\text{C}_{70}$  ( $5 \cdot 10^{-5}$  M, in red) and its mixture with **Cu2a** ( $10^{-5}$  M, in blue). All voltammograms were acquired in the presence of a solution of  $\text{NBu}_4\text{PF}_6$  (0.1 M) and with a scan rate of  $100 \text{ mV} \cdot \text{s}^{-1}$ . Potentials are referenced against  $\text{Fc}/\text{Fc}^+$ .

## General procedure for in situ complexation and ligand cleavage

Different stock solutions of final complexes **Cu1a**, **Cu1b**, **Cu2a** and **Cu2b** ( $1.0 \times 10^{-3}$  M), ligand dppe (1,2-Bis(diphenylphosphino)ethane) ( $5.0 \times 10^{-2}$  M) and starting copper complex  $[\text{Cu}(\text{NCMe})_4]\text{BF}_4$  ( $5.0 \times 10^{-2}$  M) were prepared in  $\text{CD}_2\text{Cl}_2$  and stored conveniently at  $0^\circ \text{C}$ .

Switching procedure consisted of the addition of 1.0 equivalent of dppe stock solution to the final complex solution in an NMR tube capped with a septum. After being gently shaken, ligand was decomplexed as revealed by a color change from yellow/orange to colorless/yellow (depending on substituents **1** or **2**). Further addition of 0.50 equivalents of  $[\text{Cu}(\text{NCMe})_4]\text{BF}_4$  stock solution immediately forms original copper complex after a gently shaking. Color turned back to yellow/orange as well. A  $^1\text{H}$ -NMR spectrum at 298 K was recorded at each stage whose chemical shift changes confirmed the existence of described compounds. The entire cyclic process could be repeated at least 4 times to demonstrate its reversible nature (see

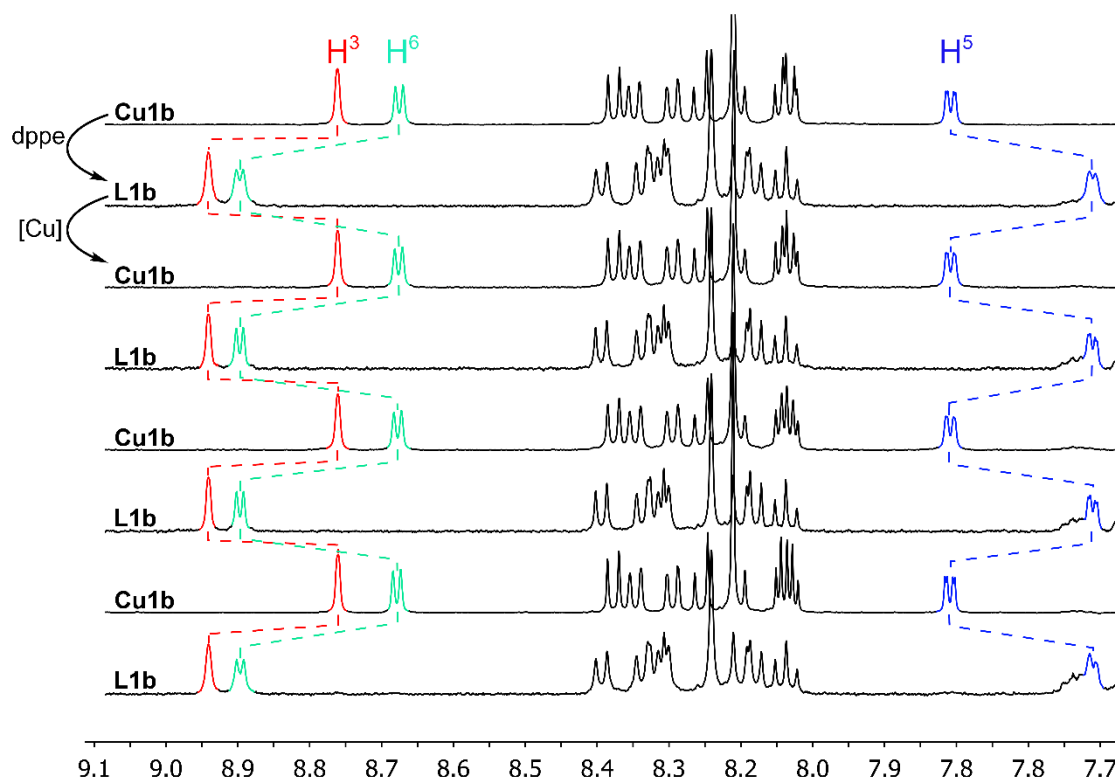

Figure S 77 - Figure S 76) and is summarized in Scheme S3.

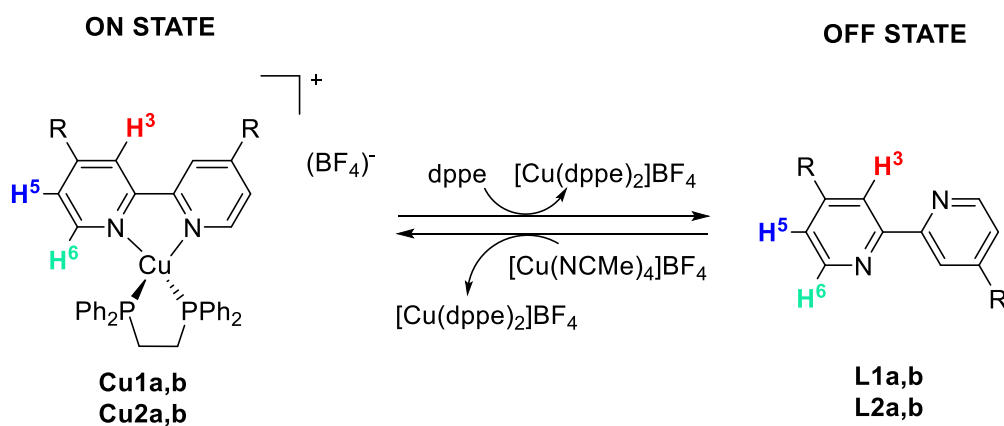

**Scheme S3.** Chemical switching process carried out for all copper complexes reported in this work. Relevant aromatic protons have been highlighted in different colors for differentiation purposes (see below).

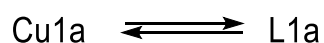

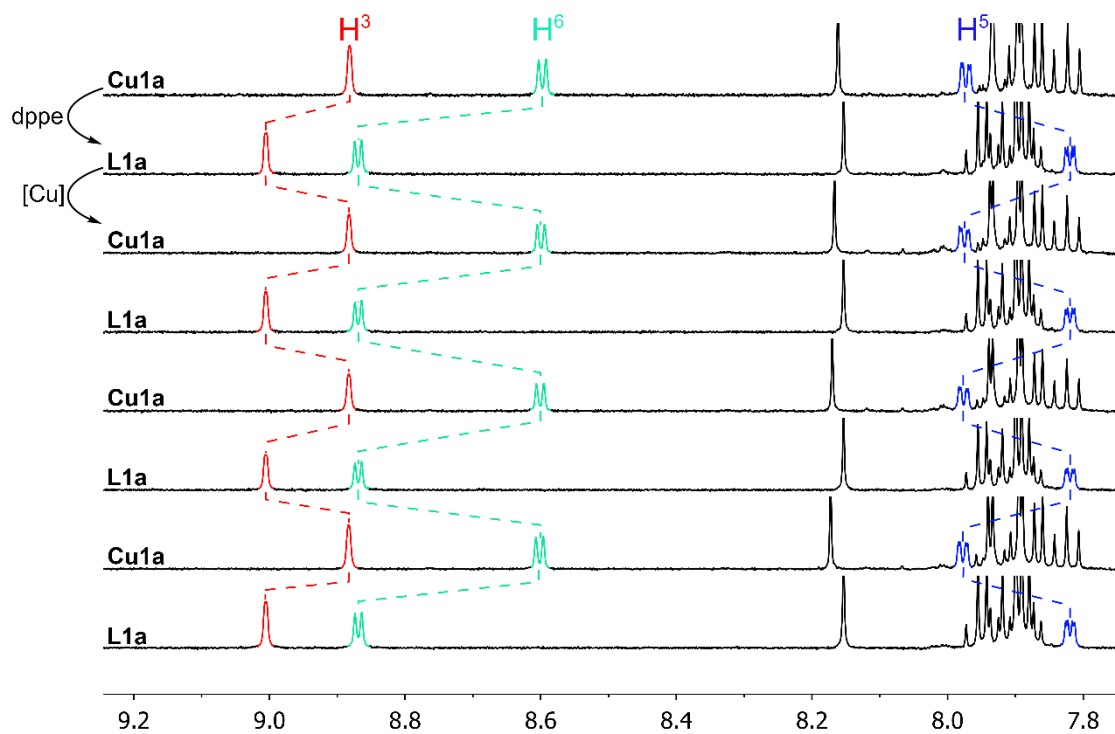

**Figure S 75.** Stacked <sup>1</sup>H-NMR (500 MHz, CD<sub>2</sub>Cl<sub>2</sub>) spectra of compounds **Cu1a/L1a** coordination/decoordination experiments at 298 K. Chemical shifts in ppm.

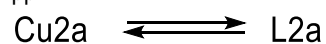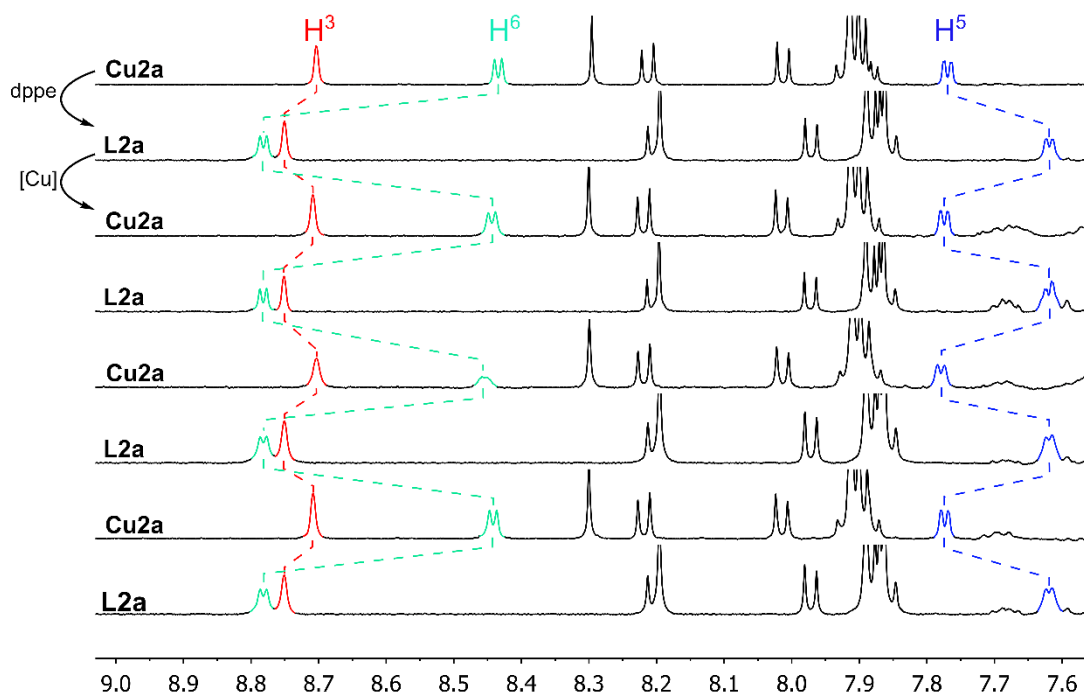

**Figure S 76.** Stacked <sup>1</sup>H-NMR (500 MHz, CD<sub>2</sub>Cl<sub>2</sub>) spectra of compounds **Cu2a/L2a** coordination/decoordination experiments at 298 K. Chemical shifts in ppm.

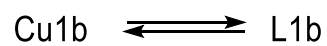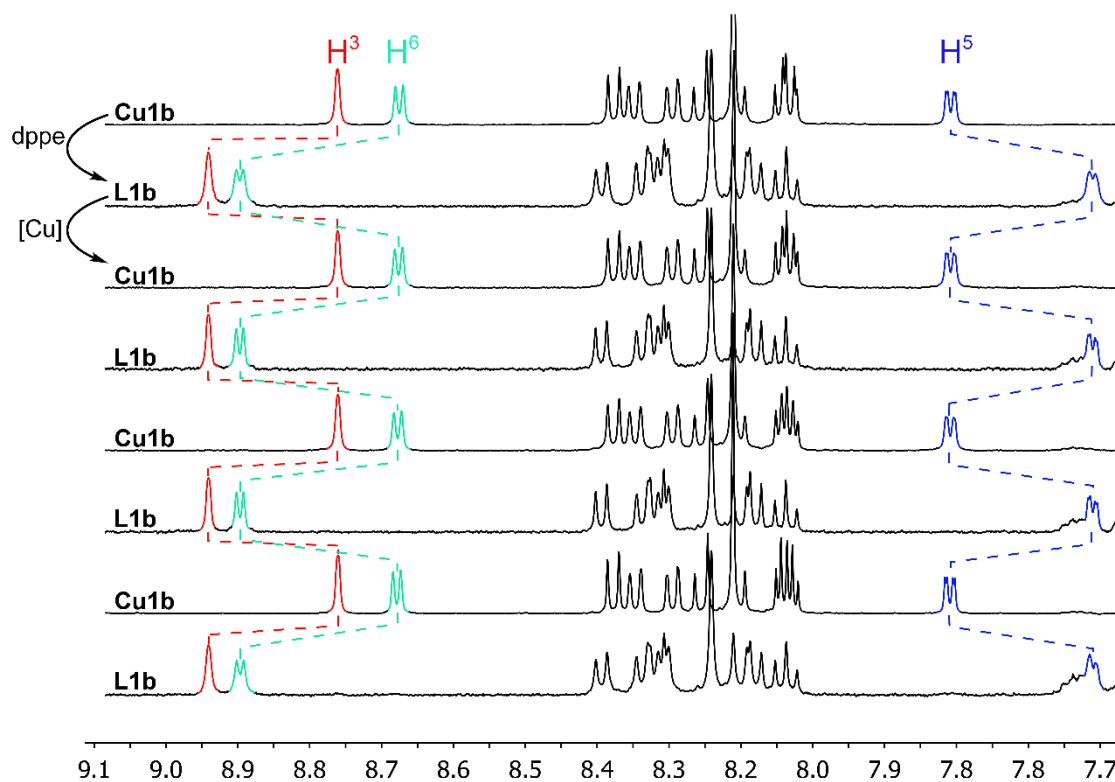

Figure S 77. Stacked <sup>1</sup>H-NMR (500 MHz, CD<sub>2</sub>Cl<sub>2</sub>) spectra of compounds **Cu1b/L1b** coordination/decoordination experiments at 298 K. Chemical shifts in ppm.

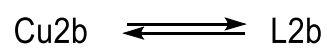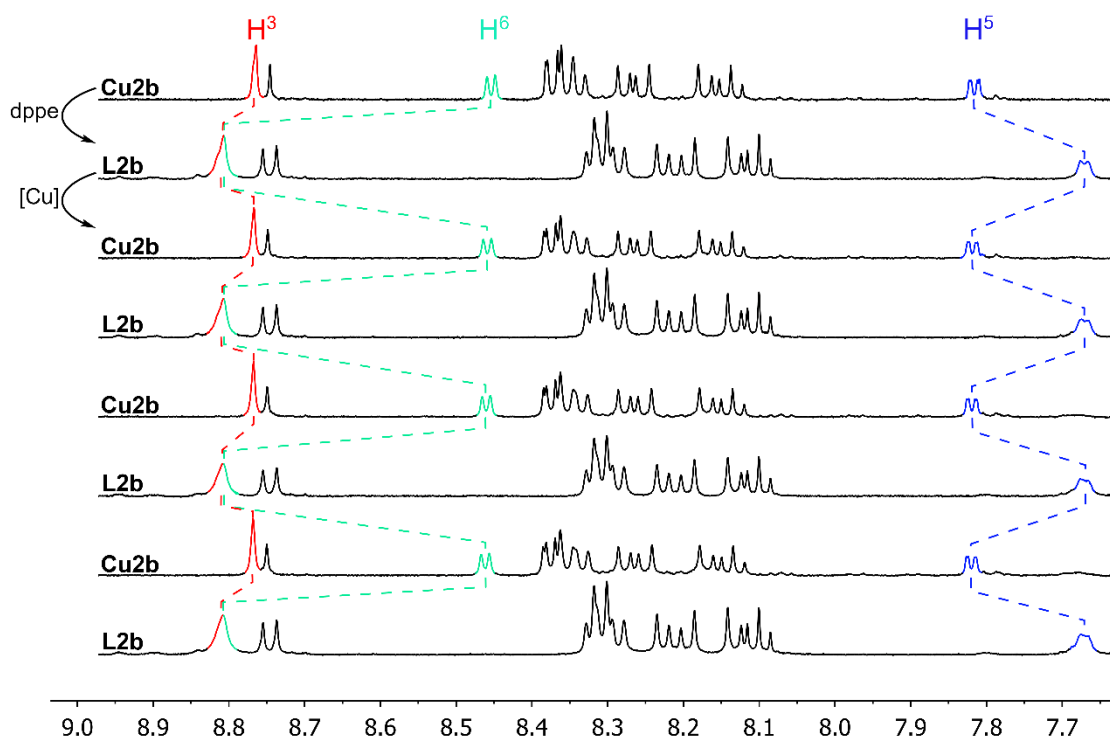

**Figure S 78.** Stacked  $^1\text{H-NMR}$  (500 MHz,  $\text{CD}_2\text{Cl}_2$ ) spectra of compounds **Cu2b/L2b** coordination/decoordination experiments at 298 K. Chemical shifts in ppm.

After several cycles, fullerenes  $\text{C}_{60}$  and  $\text{C}_{70}$  were added to the NMR tube (10 eq) and more coordination/decoordination cycles were carried out following the procedure described above (see Figure S 87 - Figure S 85). In this second sequence of experiments,  $^1\text{H NMR}$  chemical shifts of complexes **Cu1a** and **Cu2a** were changed with respect to the parent spectra whereas those for ligands **L1a**, **L1b**, **L2a** and **L2b** and complexes **Cu1b** and **Cu2b** were invariant. This clearly indicates that corannulene-based complexes have engaged in fullerene recognition as opposed to pyrene-based complexes and free ligands.

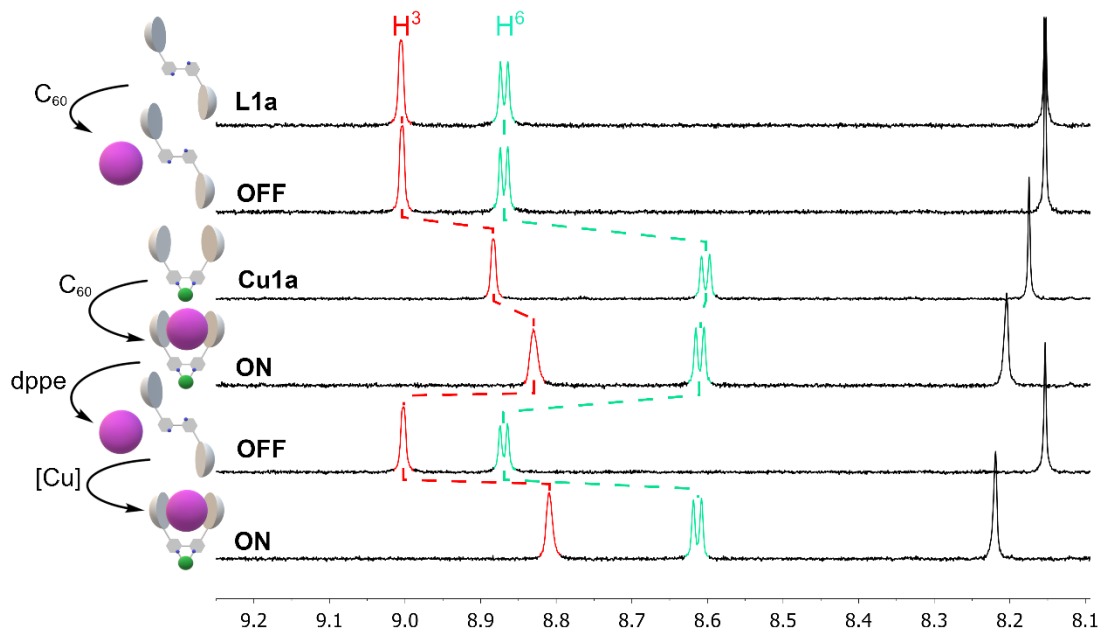

**Figure S 79.** Stacked  $^1\text{H-NMR}$  (500 MHz,  $\text{CD}_2\text{Cl}_2$ ) spectra of mixtures **Cu1a+C<sub>60</sub>/L1a+C<sub>60</sub>** coordination/decoordination experiments at 298 K. Chemical shifts in ppm.

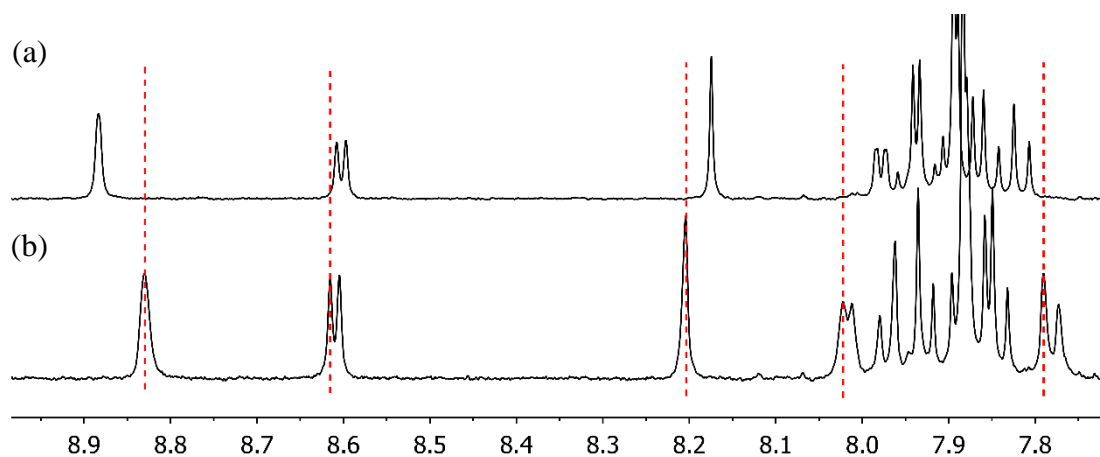

**Figure S 80.**  $^1\text{H-NMR}$  (500 MHz,  $\text{CD}_2\text{Cl}_2$ ) spectra of (a) **Cu1a** and (b) **Cu1a** with an excess of  $\text{C}_{60}$  at 298 K. Vertical straight dashed red lines were drawn to show the chemical shift changes of both the bpy and corannulene moieties.

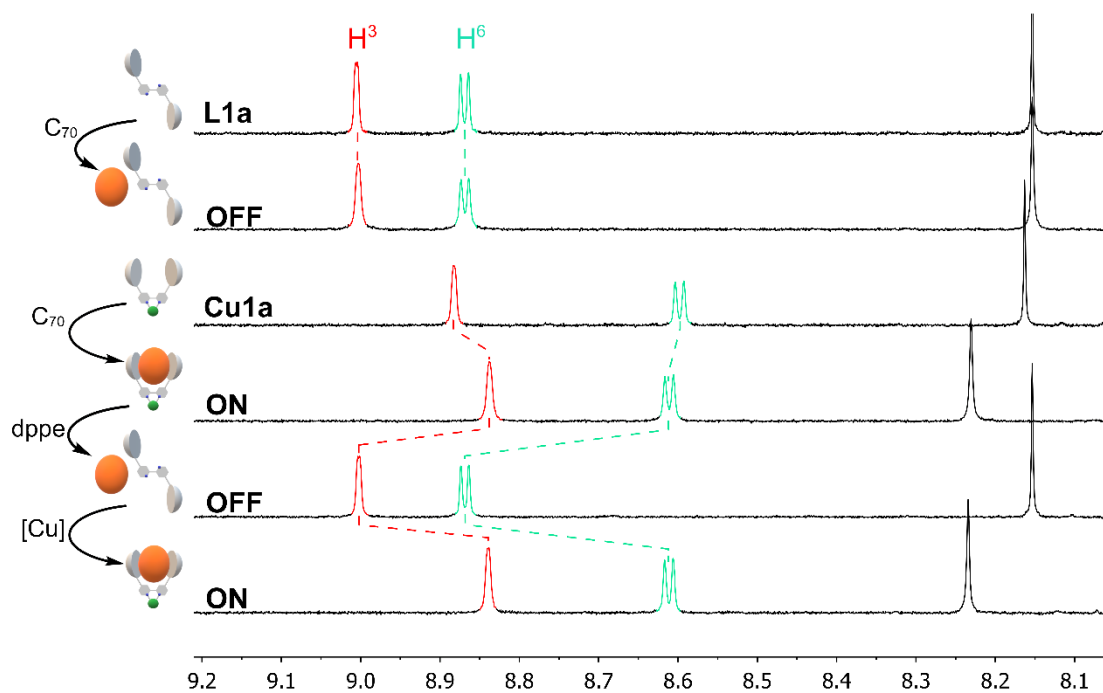

**Figure S 81.** Stacked  $^1\text{H-NMR}$  (500 MHz,  $\text{CD}_2\text{Cl}_2$ ) spectra of mixtures **Cu1a+C<sub>70</sub>/L1a+C<sub>70</sub>** coordination/decoordination experiments at 298 K. Chemical shifts in ppm

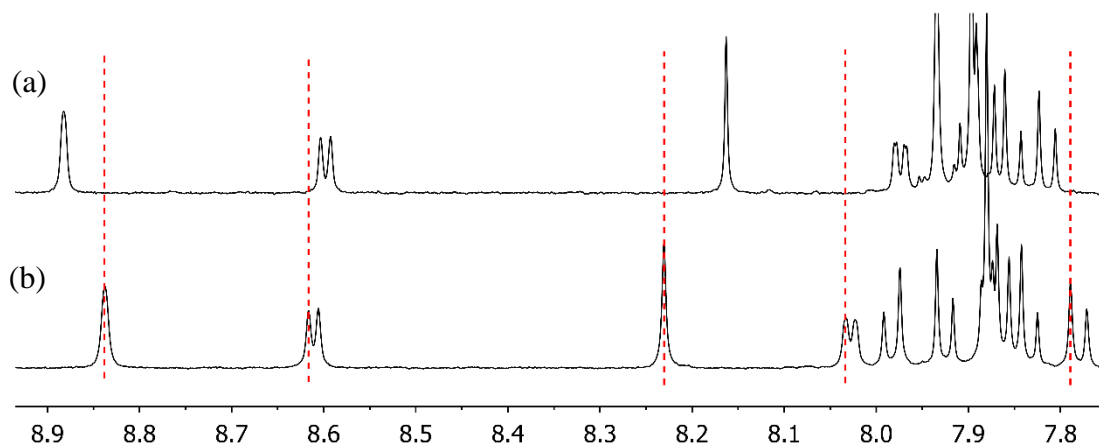

**Figure S 82.**  $^1\text{H-NMR}$  (500 MHz,  $\text{CD}_2\text{Cl}_2$ ) spectra of (a) **Cu1a** and (b) **Cu1a** with an excess of **C<sub>70</sub>** at 298 K. Vertical straight dashed red lines were drawn to show the chemical shift changes of both the bpy and corannulene moieties.

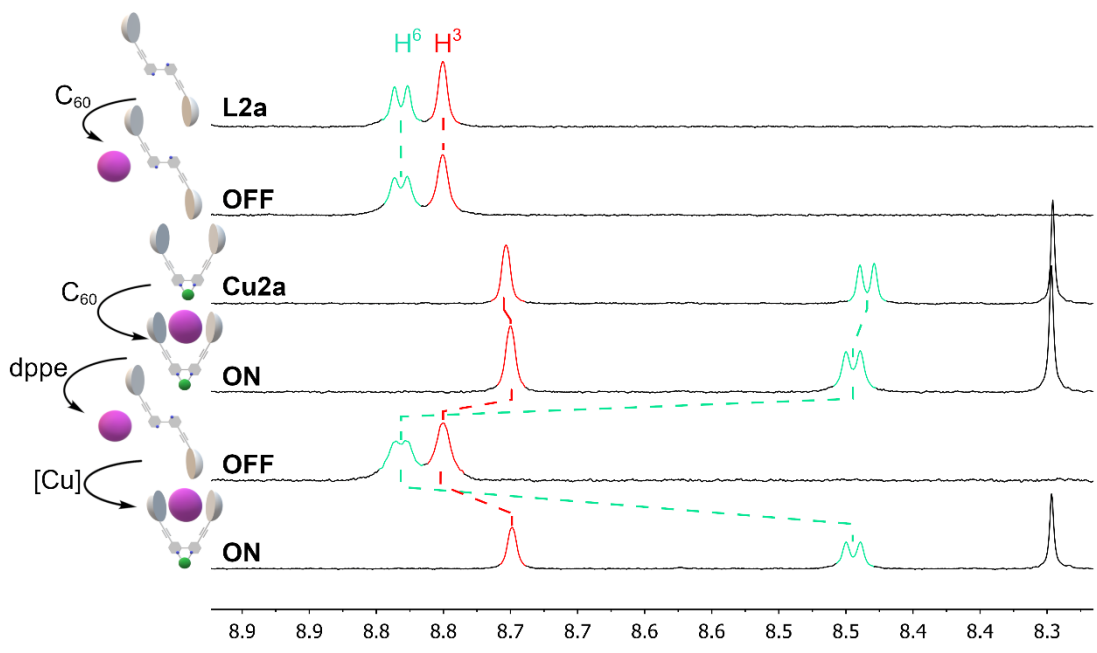

**Figure S 83.** Stacked <sup>1</sup>H-NMR (500 MHz, CD<sub>2</sub>Cl<sub>2</sub>) spectra of mixtures **Cu<sub>2</sub>a+C<sub>60</sub>/L2a+C<sub>60</sub>** coordination/decoordination experiments at 298 K. Chemical shifts in ppm.

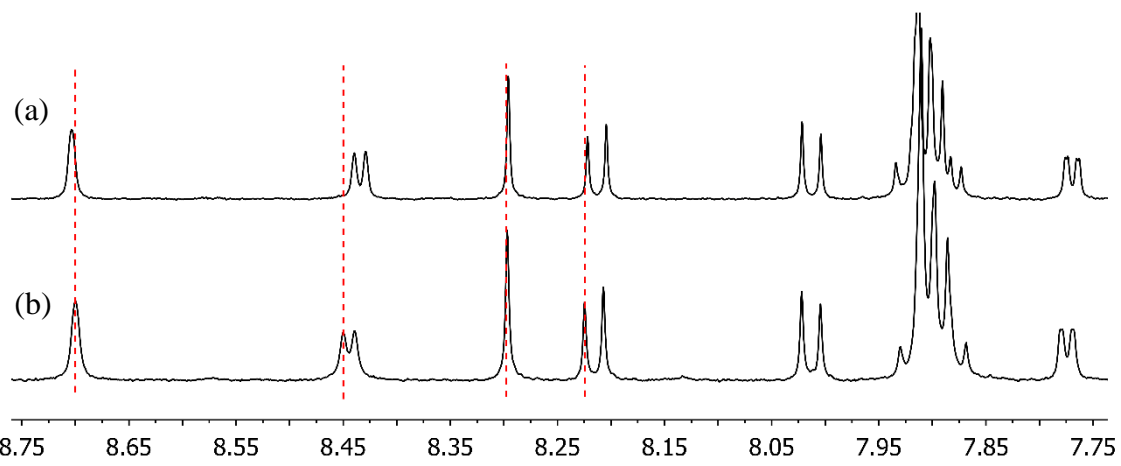

**Figure S 84.** <sup>1</sup>H-NMR (500 MHz, CD<sub>2</sub>Cl<sub>2</sub>) spectra of (a) **Cu<sub>2</sub>a** and (b) **Cu<sub>2</sub>a** with an excess of C<sub>60</sub> at 298 K. Vertical straight dashed red lines were drawn to show the chemical shift changes of both the bpy and corannulene moieties.



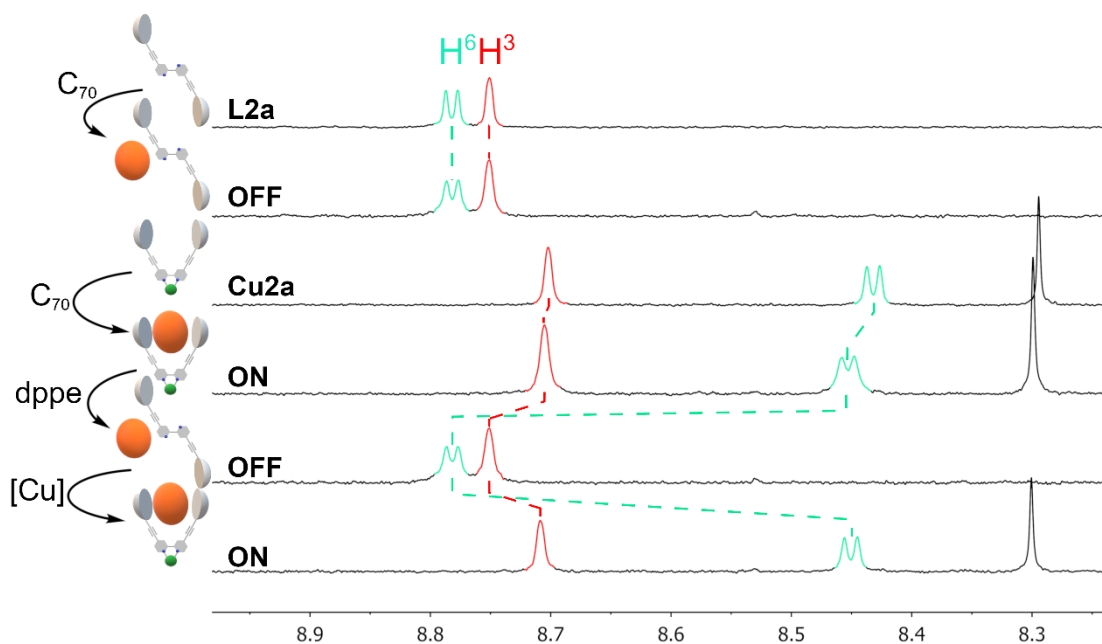

**Figure S 85.** Stacked <sup>1</sup>H-NMR (500 MHz, CD<sub>2</sub>Cl<sub>2</sub>) spectra of mixtures **Cu2a+C<sub>70</sub>/L2a+C<sub>70</sub>** coordination/decoordination experiments at 298 K. Chemical shifts in ppm.

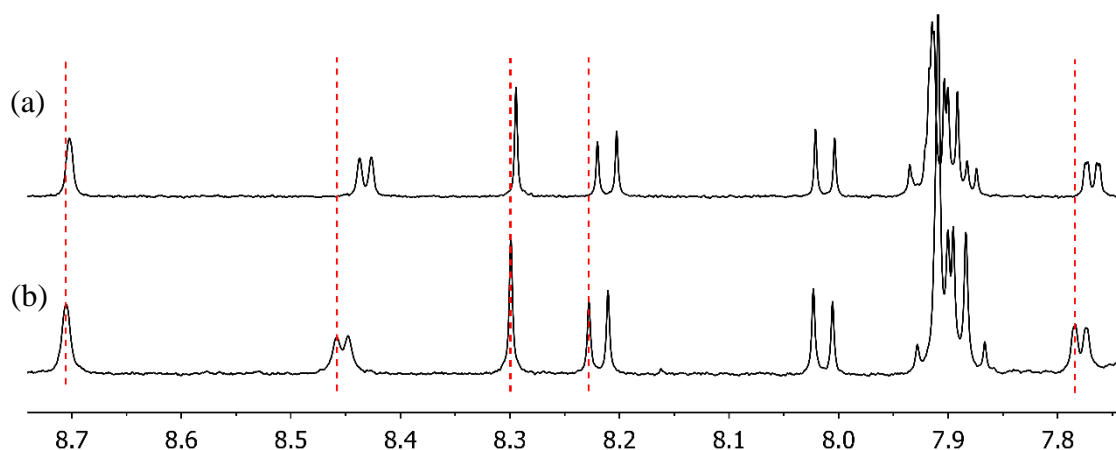

**Figure S 86.** <sup>1</sup>H-NMR (500 MHz, CD<sub>2</sub>Cl<sub>2</sub>) spectra of (a) **Cu<sub>2</sub>a** and (b) **Cu<sub>2</sub>a** with an excess of C<sub>70</sub> at 298 K. Vertical straight dashed red lines were drawn to show the chemical shift changes of both the bpy and corannulene moieties.

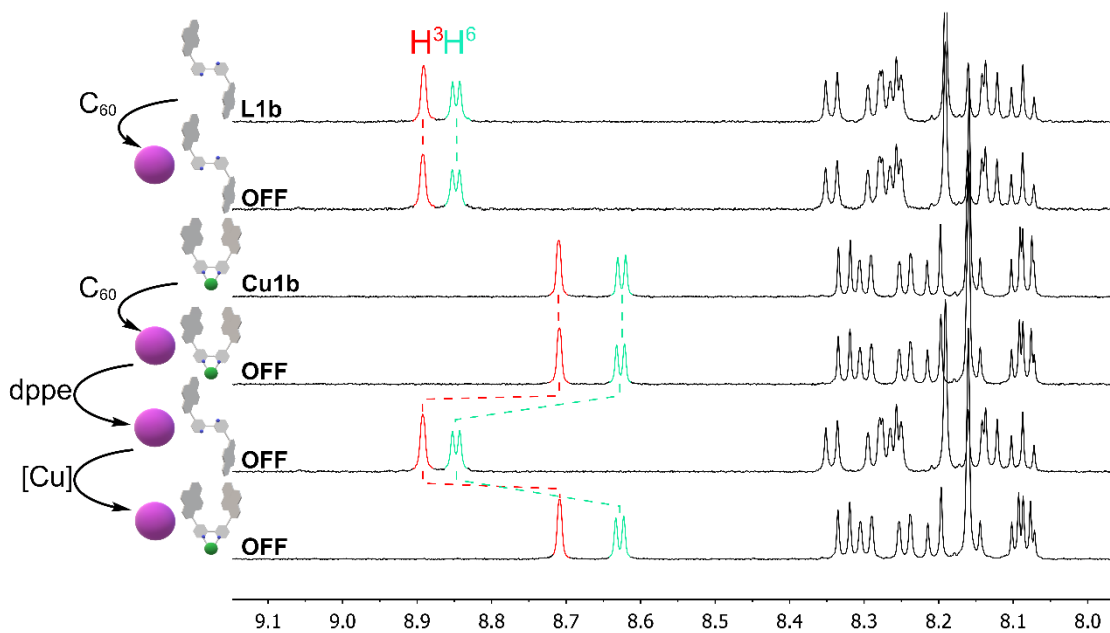

Figure S 87. Stacked  $^1\text{H-NMR}$  (500 MHz,  $\text{CD}_2\text{Cl}_2$ ) spectra of mixtures **Cu1b+C<sub>60</sub>/L1b+C<sub>60</sub>** coordination/decoordination experiments at 298 K. Chemical shifts in ppm.

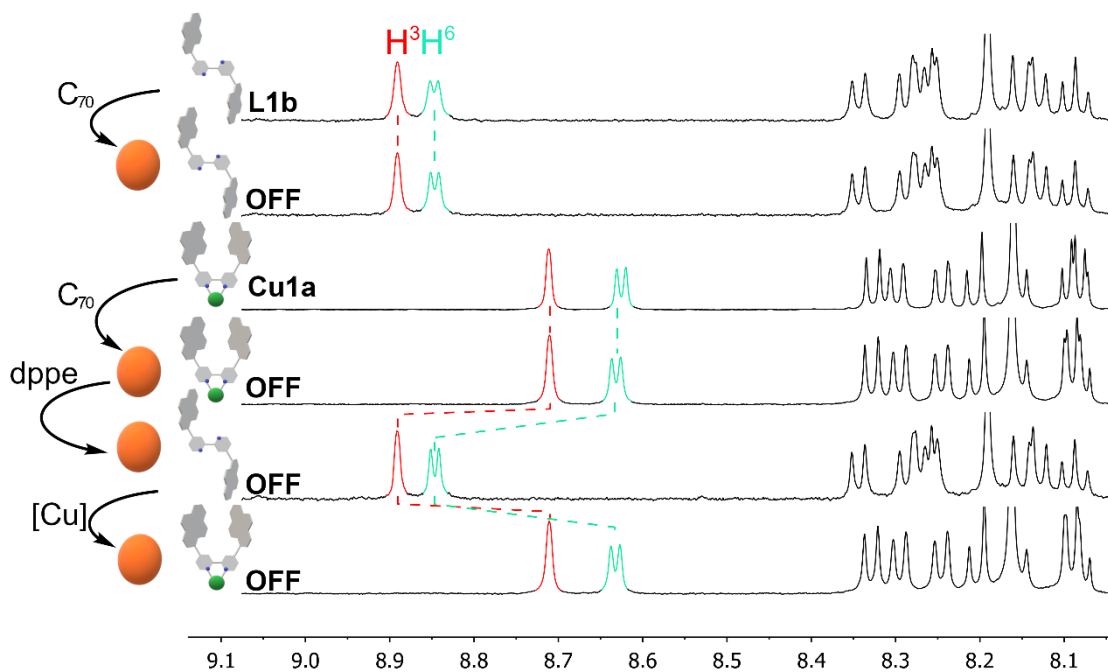

Figure S 88. Stacked  $^1\text{H-NMR}$  (500 MHz,  $\text{CD}_2\text{Cl}_2$ ) spectra of mixtures **Cu1b+C<sub>70</sub>/L1b+C<sub>70</sub>** coordination/decoordination experiments at 298 K. Chemical shifts in ppm.

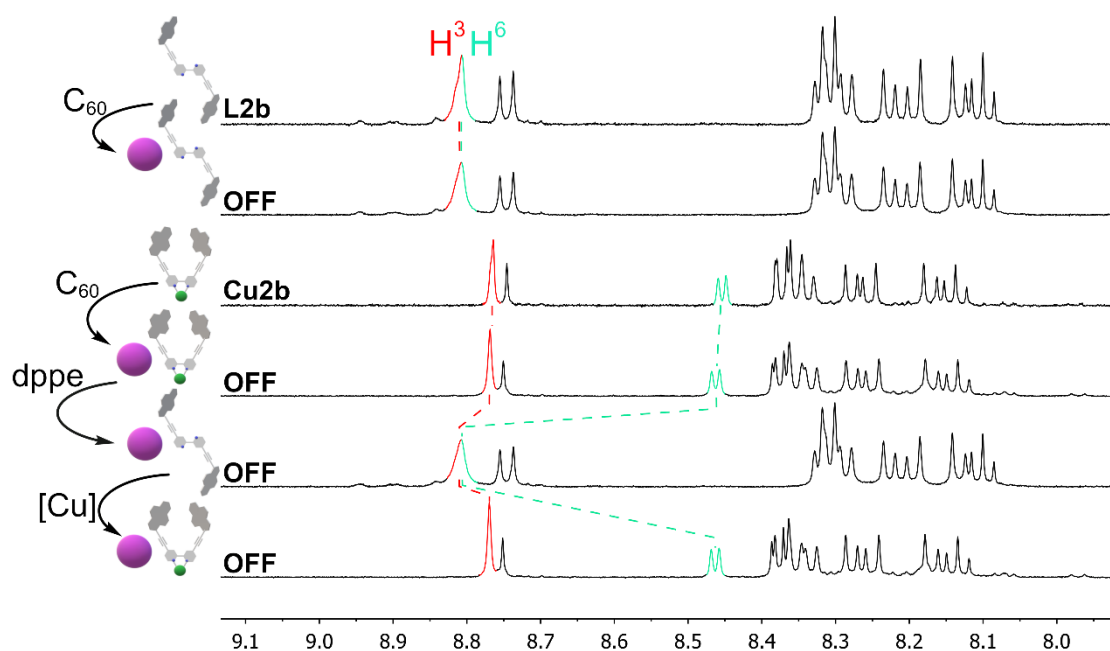

**Figure S 89.** Stacked  $^1\text{H-NMR}$  (500 MHz,  $\text{CD}_2\text{Cl}_2$ ) spectra of mixtures **Cu2b+C<sub>60</sub>/L2b+C<sub>60</sub>** coordination/decoordination experiments at 298 K. Chemical shifts in ppm.

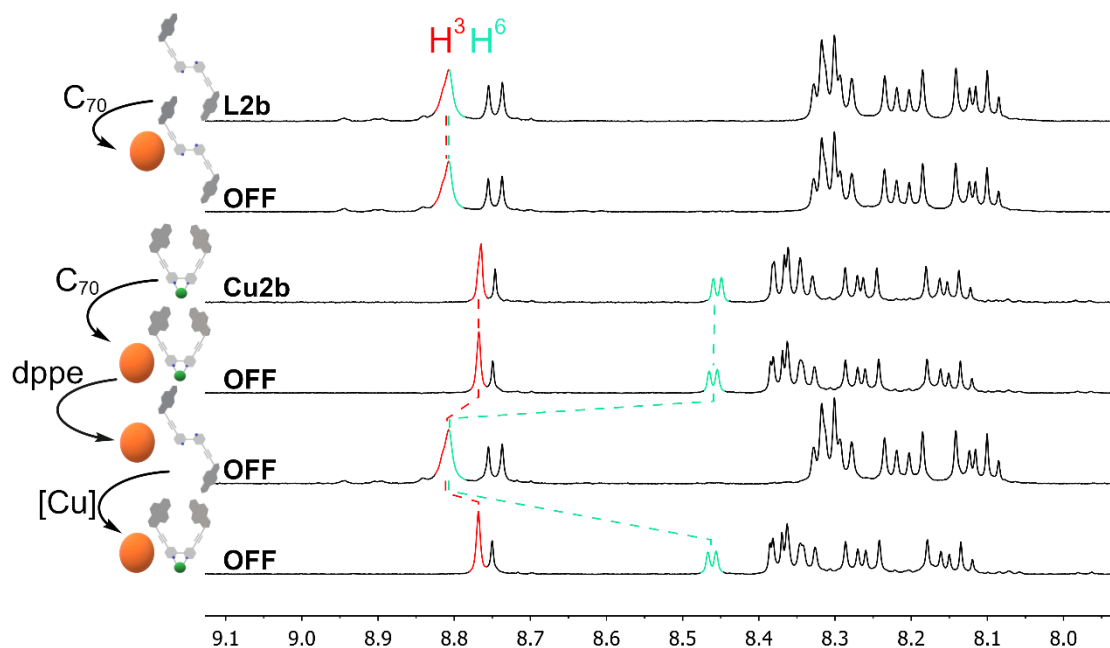

**Figure S 90.** Stacked  $^1\text{H-NMR}$  (500 MHz,  $\text{CD}_2\text{Cl}_2$ ) spectra of mixtures **Cu2b+C<sub>70</sub>/L2b+C<sub>70</sub>** coordination/decoordination experiments at 298 K. Chemical shifts in ppm.

## Association constants measurements

In order to estimate the association constants ( $K_a$ ) of complexes **Cu1a** and **Cu2a** with fullerenes  $C_{60}$  and  $C_{70}$ , the following procedure was carried out: a solution of each compound ( $2.0 \times 10^{-5}$  M) in deuterated dichloromethane was prepared and a known volume was transferred to an NMR tube capped with a septum (0.50 mL). The titration was carried out by injecting through the septum known portions of a stock solution of  $C_{60}$  ( $2.0 \times 10^{-4}$  M) in deuterated dichloromethane to cover a wide range of equivalents. The same protocol was followed for  $C_{70}$ . A  $^1\text{H-NMR}$  spectrum was recorded at room temperature (298 K) after each addition. Once all data had been obtained, the changes in chemical shifts ( $\Delta\delta$ ) of selected protons were plotted as a function of the molar fraction of the guest, and the resulting curve was fitted by a nonlinear method using the global analysis approach according to the following equations assuming a 1:1 equilibrium:

$$K_a = \frac{[HG]}{[H][G]} \quad \text{eq. 1}$$

Changes in chemical shifts upon NMR titration are expressed:

$$\Delta\delta = \Delta\delta_{max} \left( \frac{[HG]}{H_0} \right) \quad \text{eq. 2}$$

Where:

[HG] is the concentration of the guest of the complex, and is calculated using the following equation...

$$[HG] = \frac{1}{2} \left( [G_0] + [H_0] + \frac{1}{K_a} \right) - \sqrt{\left( [G_0] + [H_0] + \frac{1}{K_a} \right)^2 - 4[G_0][H_0]} \quad \text{eq. 3}$$

Where:

[ $G_0$ ] is the total concentration of the guest ( $C_{60}$  or  $C_{70}$ ).

[ $H_0$ ] is the total concentration of the host (**Cu1a** or **Cu2a**).

$\Delta\delta_{max}$  is  $\Delta\delta$  at maximum complexation (100% supramolecular complex formation).

$K_a$  is the estimated association constant for 1:1 equilibrium.

In each case,  $\Delta\delta_{max}$  and  $K_a$  for a 1:1 equilibrium were extracted by using the non-linear fitting tool provided by the open access web portal Supramolecular.org (<http://supramolecular.org>) applying equations 2 and 3. Links to all the fittings of the data are provided below.

**Cu1a** Vs  $C_{60}$

<http://app.supramolecular.org/bindfit/view/49f7f748-f993-4d63-8d7d-0a588f8af0ff>

**Cu1a** Vs  $C_{70}$

<http://app.supramolecular.org/bindfit/view/82d040c4-de8c-4567-aa76-7a38bcd01444>

**Cu2a** Vs  $C_{60}$

<http://app.supramolecular.org/bindfit/view/f64f17a6-cbe1-4829-adc0-9b7a79731c77>

**Cu2a** Vs  $C_{70}$

<http://app.supramolecular.org/bindfit/view/218dfb73-8470-462e-b5f6-f83d28202bd3>

**Table S 1.** Estimated  $K_a$  values calculated from selected protons in each compound (in  $\text{M}^{-1}$ ).

|             | $C_{60}$                    | $C_{70}$                    |
|-------------|-----------------------------|-----------------------------|
| <b>Cu1a</b> | $2.00 \pm 0.01 \times 10^3$ | $4.99 \pm 0.01 \times 10^4$ |
| <b>Cu2a</b> | $1.15 \pm 0.01 \times 10^3$ | $2.11 \pm 0.01 \times 10^4$ |

The most affected chemical shifts were those belonging to protons in the bpy unit (especially for hydrogen  $H^3$ , as it points toward the fullerene upon inclusion complex formation) as well as the singlet and doublet from the corannulene group ( $H^9$  and  $H^{16}$  for complex **Cu1a**;  $H^{10}$  and  $H^{18}$  for complex **Cu2a**), which correspond to the hydrogens closest to the substituted carbon. They were also selected because they appear in a relatively clean section of the spectrum and their signals can be reliably followed.

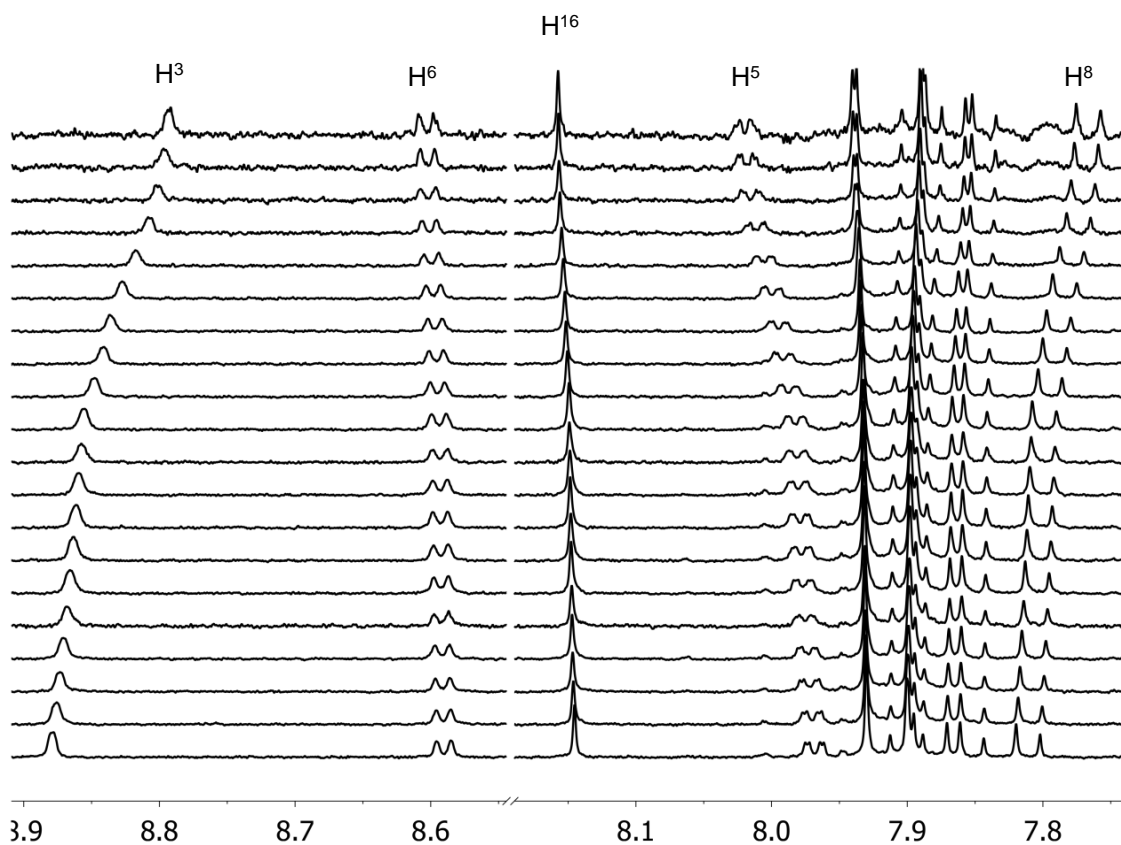

**Figure S 91.** Stacked  $^1\text{H}$ -NMR spectra for the titration of complex **Cu1a** with variable concentrations of  $\text{C}_{60}$  in methylene chloride- $\text{d}_2$  at 298 K. Chemical shifts in ppm. The most significant chemical shifts corresponding to the bpy moiety ( $\text{H}^3$ ,  $\text{H}^5$ ,  $\text{H}^6$ ) and the corannulene substituent ( $\text{H}^8$ ,  $\text{H}^{16}$ ) have been labeled accordingly.

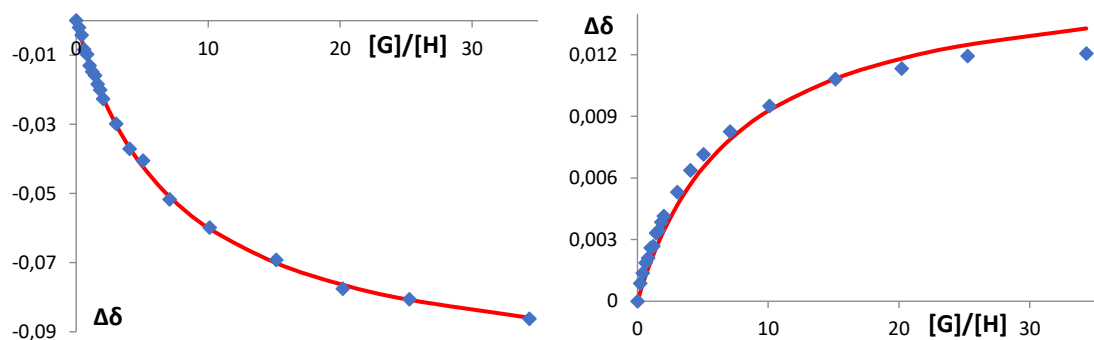

**Figure S 92.** Nonlinear regressions for selected protons (left plot:  $\text{H}_3$ , right plot:  $\text{H}_{16}$ .) for the titration of complex **Cu1a** with  $\text{C}_{60}$ .

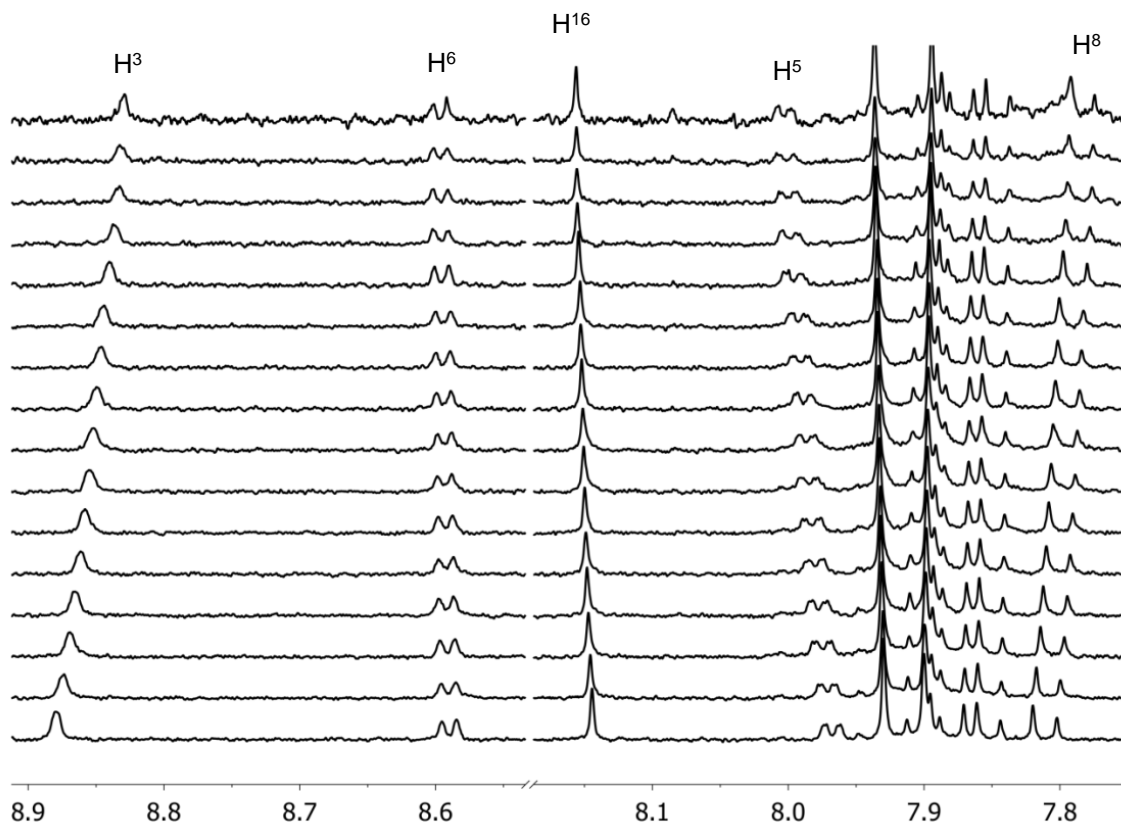

**Figure S 93.** Stacked <sup>1</sup>H-NMR spectra for the titration of complex **Cu1a** with variable concentrations of C<sub>70</sub> in methylene chloride-d<sub>2</sub> at 298 K. Chemical shifts in ppm. The most significant chemical shifts corresponding to the bpy moiety (H<sup>3</sup>, H<sup>5</sup>, H<sup>6</sup>) and the corannulene substituent (H<sup>8</sup>, H<sup>16</sup>) have been labeled accordingly.

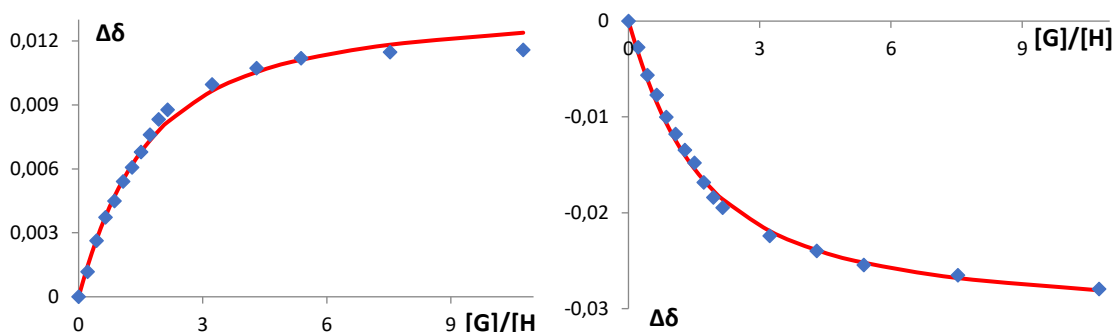

**Figure S 94.** Nonlinear regressions for selected protons (left plot: H<sub>16</sub>, right plot: H<sub>8</sub>) for the titration of complex **Cu1a** with C<sub>70</sub>.

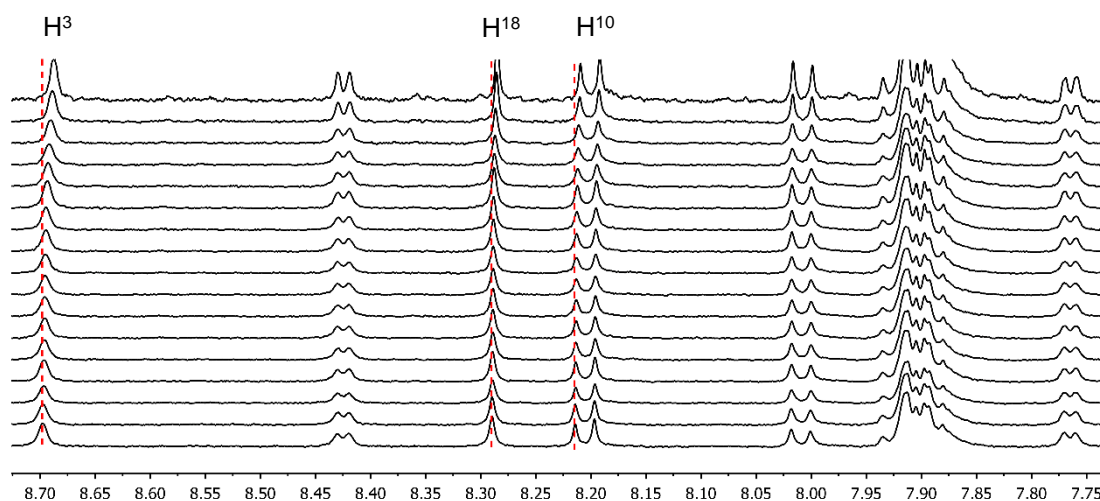

**Figure S 95.** Stacked  $^1\text{H-NMR}$  spectra for the titration of complex **Cu2a** with variable concentrations of  $\text{C}_{60}$  in methylene chloride- $\text{d}_2$  at 298 K. Chemical shifts in ppm. Only the aromatic region in which the bpy and corannulene signals appear is shown. The most significant chemical shifts corresponding to the bpy moiety ( $\text{H}^3$ ) and the corannulene substituent ( $\text{H}^{18}$ ,  $\text{H}^{10}$ ) have been labeled accordingly, and a vertical straight dashed red line has been placed to guide the reader and highlight the changes in chemical shift.

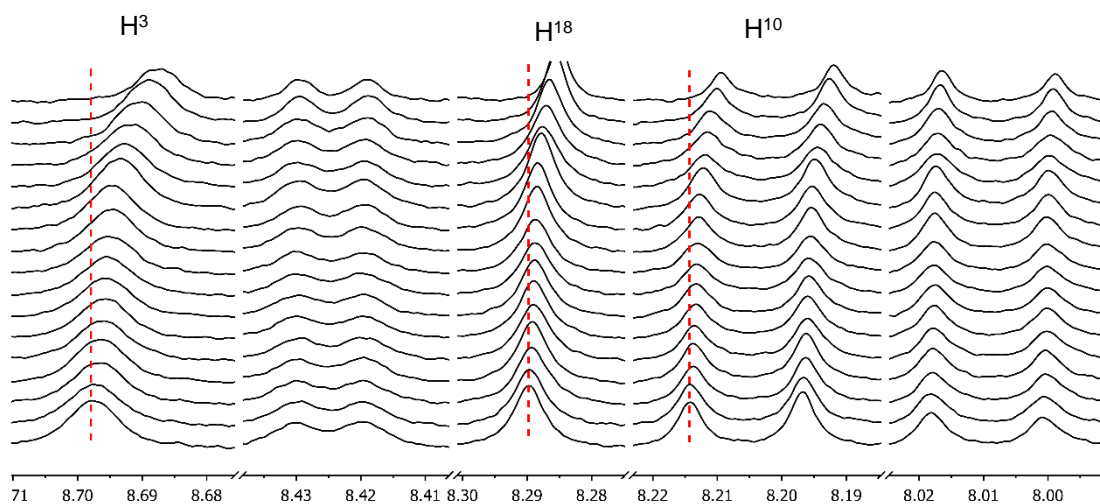

**Figure S 96.** Close-up of stacked  $^1\text{H-NMR}$  spectra for the titration of complex **Cu2a** with variable concentrations of  $\text{C}_{60}$  in methylene chloride- $\text{d}_2$  at 298 K.

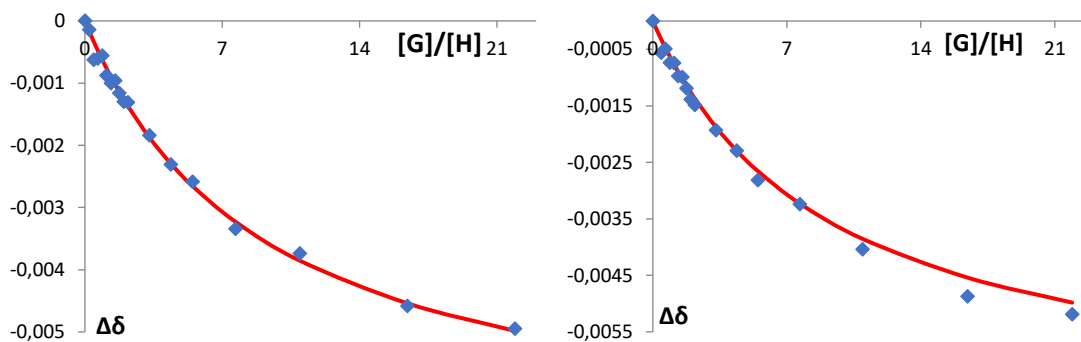

**Figure S 97.** Nonlinear regressions for selected protons (left plot:  $\text{H}_{18}$ , right plot:  $\text{H}_{10}$ ), for the titration of complex **Cu2a** with  $\text{C}_{60}$ .

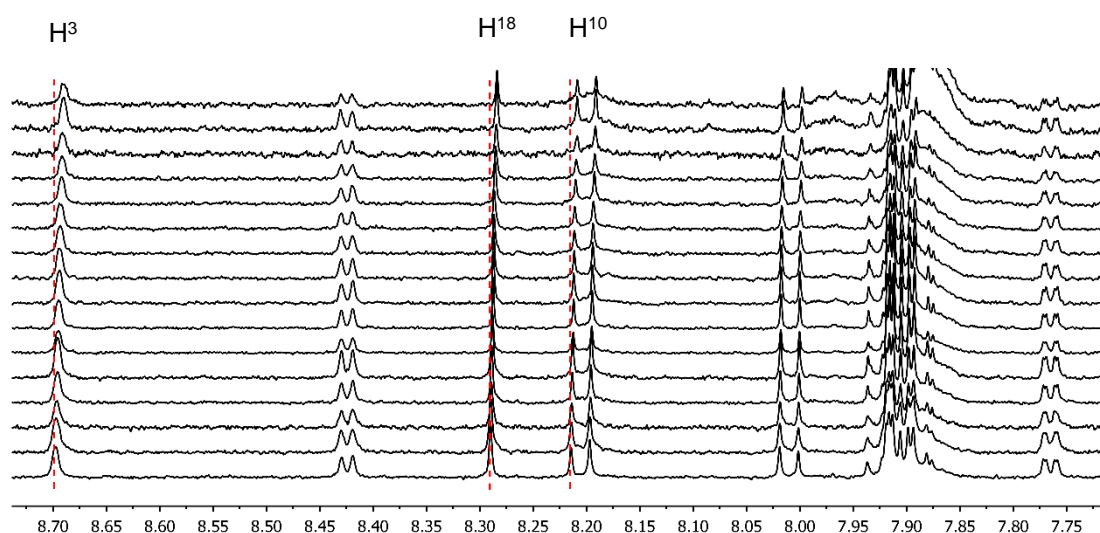

**Figure S 98.** Stacked  $^1\text{H-NMR}$  spectra for the titration of complex **Cu2a** with variable concentrations of  $\text{C}_{70}$  in methylene chloride- $\text{d}_2$  at 298K. Chemical shifts in ppm. Only the aromatic region in which bpy and corannulene signals appear is shown. The most significant chemical shifts corresponding to the bpy moiety ( $\text{H}^3$ ) and the corannulene substituent ( $\text{H}^{18}$ ,  $\text{H}^{10}$ ) have been labeled accordingly, and a vertical straight dashed red line has been placed to guide the reader and highlight the changes in chemical shift.

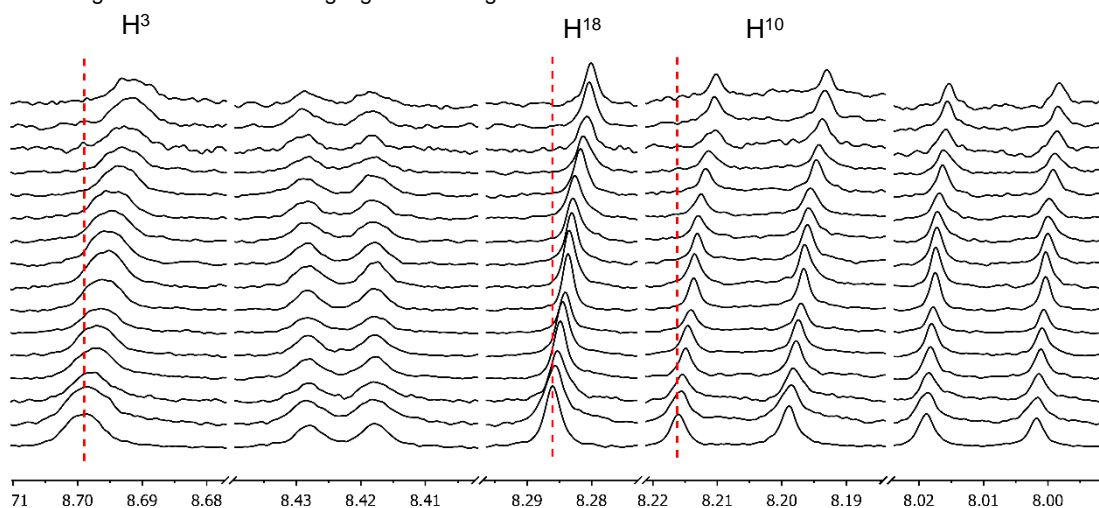

**Figure S 99.** Close-up of stacked  $^1\text{H-NMR}$  spectra for the titration of complex **Cu2a** with variable concentrations of  $\text{C}_{70}$  in methylene chloride- $\text{d}_2$  at 298 K.

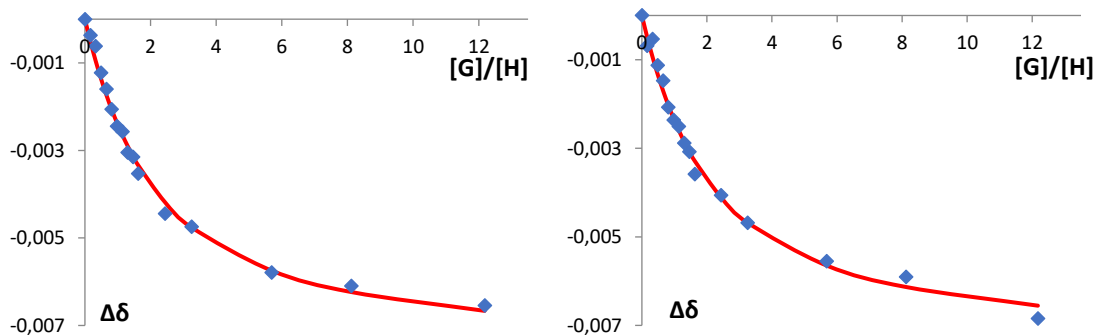

**Figure S 100.** Nonlinear regressions for selected protons (left plot:  $\text{H}_{18}$ , right plot:  $\text{H}_{10}$ .) for the titration of complex **Cu2a** with  $\text{C}_{70}$ .



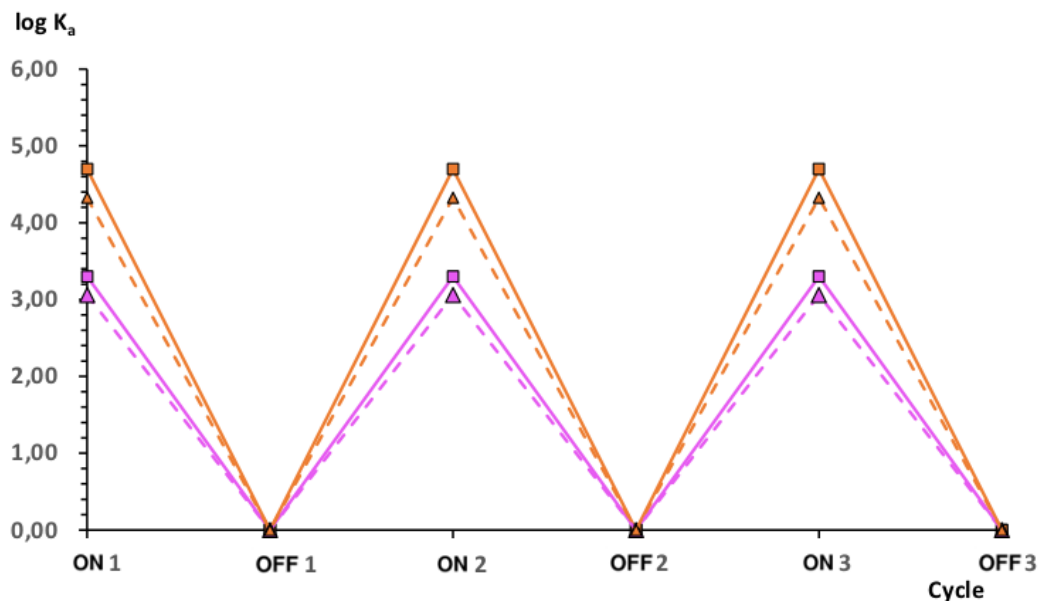

**Figure S 101.** Association constant variation throughout three complete ON/OFF cycles. Squares with solid lines correspond to complex **Cu1a**, whereas triangles with dashed lines correspond to complex **Cu2a**. Pink and orange traces represent fullerenes C<sub>60</sub> and C<sub>70</sub>, respectively.

## Computational calculations details

In order to optimize the geometry of supramolecular assemblies **C<sub>60</sub>@Cu1a** and **C<sub>60</sub>@Cu2a**, structures of surrogate protonated bpy, namely **C<sub>60</sub>@HL1a** and **C<sub>60</sub>@HL2a**, were used replacing the metal fragment by a hydrogen to reduce the computational cost. Calculations were carried out by DFT methods with Grimme's B97D3 functional containing the Becke-Johnson damping empirical dispersion correction.<sup>9–11</sup> Pople and collaborators' split valence basis set 6-31G(d,p) was chosen.<sup>12–15</sup> Hydrogen atom was then replaced by Cu(dppe) fragment and further optimized with Perdew, Burke and Ernzerhof's PBE0 functional<sup>16,17</sup> along with Los Alamos Electron Core Potential and the associated double zeta basis set<sup>18–20</sup> keeping the supramolecular assembly moiety frozen. All minima were confirmed by vibrational analysis to have zero imaginary frequencies in all cases. More accurate energies were calculated on the optimized geometries by using a more extended 6-31+G(d,p) basis set that includes diffuse functions.<sup>12–15</sup>

For the estimation of the rotational barrier of compound **L1a**, a relaxed PES scan was performed by rotating NCCN dihedral angle 10 degrees at each step for a total of 20 points.

All the above calculations were carried out by describing the impact of the solvent via the implicit Polarizable Continuum Model (PCM)<sup>21</sup> and choosing dichloromethane ( $\epsilon = 8.93$ ) as the solvent.

Interaction energies were calculated in the gas phase over already optimized structures by using a more extended 6-31+G(d,p) basis set that includes diffuse functions and taking into account basis set superposition error (BSSE) with the Boys–Bernardi functional counterpoise scheme<sup>22–25</sup> using Equation 4:

$$E_{int}(AB) = E_{AB}^{\alpha\beta}(AB) - E_{AB}^{\alpha\beta}(A) - E_{AB}^{\alpha\beta}(B) \quad \text{eq. 4}$$

Subscripts denote the geometry used (AB, inclusion complex in all cases) and the superscripts refer to the basis set ( $\alpha\beta$ , the one belonging to supramolecular assembly in all cases). A and B correspond to host and guest entities that interact to furnish the AB adduct.

Previously described computational methods were performed in Gaussian 16 package.<sup>26</sup>

Non-covalent interactions were obtained by the location of critical points where the reduced density gradient decreases at low electronic density values according to Yang and collaborators' scheme with the help of the NCIPLOT package.<sup>27,28</sup> Calculations were performed with promolecular densities, and gradient isosurfaces were plotted with an isovalue of 0.3 a.u. and colored on a blue-green-red scale according to values of the sign of  $\lambda_2$  (second eigenvalue of the electron-density Hessian). Red indicates repulsion, green means weak attraction, and blue represents strong attraction. Graphics were visualized in Chimera<sup>29</sup> with the help of Tangram NCIPLOT GUI built by Insilichem Group.<sup>30</sup>

**C<sub>60</sub>@Cu1a (G = -6191,911611 a.u.)**

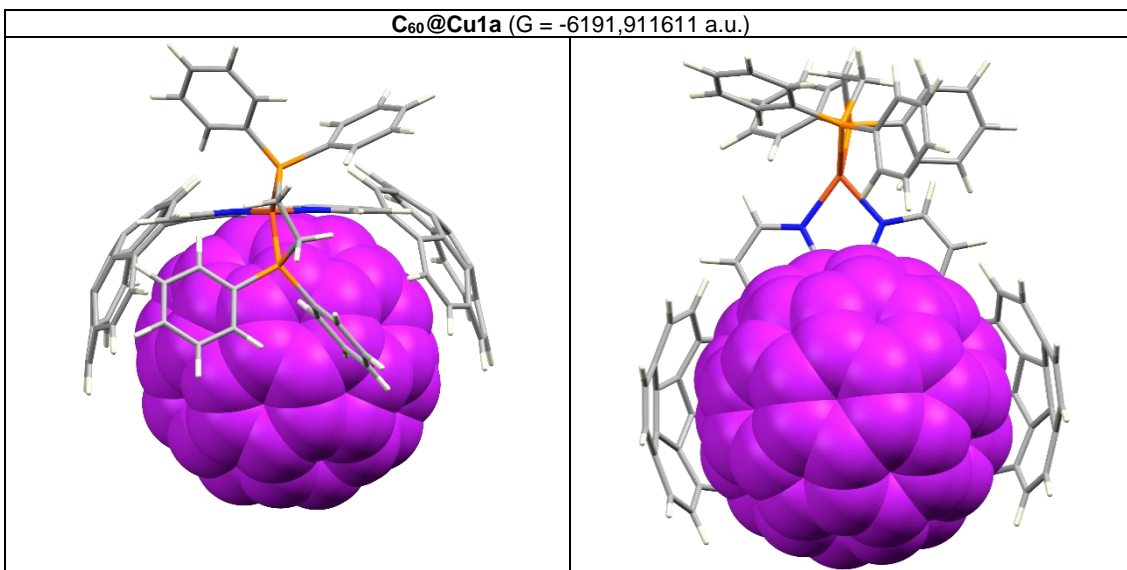

|   |           |           |           |   |           |           |           |    |            |           |           |
|---|-----------|-----------|-----------|---|-----------|-----------|-----------|----|------------|-----------|-----------|
| C | -4.107649 | -2.862664 | -0.806481 | C | 1.578587  | -5.206004 | -3.037520 | C  | 1.085803   | 0.327414  | -1.253020 |
| C | -2.993366 | -0.937003 | -1.393075 | C | -0.016067 | -3.457449 | -3.359921 | C  | 2.475762   | 3.248088  | 0.297314  |
| C | -1.887377 | -1.653623 | -1.862440 | C | 2.934229  | -6.662015 | 1.055515  | C  | 2.709461   | 3.311885  | 1.735851  |
| C | -1.893000 | -3.059825 | -1.780053 | C | 3.065351  | -6.358718 | -1.706175 | C  | 4.146726   | 3.445208  | 1.953129  |
| C | -3.043793 | -3.665489 | -1.238706 | C | 1.227351  | -4.067003 | -3.762000 | C  | 4.799655   | 3.462287  | 0.647281  |
| H | -5.006237 | -3.317715 | -0.388975 | C | 2.923262  | -5.669235 | -2.946145 | C  | 3.765597   | 3.338857  | -0.374551 |
| H | -1.004919 | -1.144738 | -2.236655 | H | -0.393286 | -2.605826 | -3.925848 | C  | 4.755738   | 2.790789  | 3.033920  |
| H | -3.112612 | -4.748023 | -1.161642 | H | 2.920080  | -6.757579 | 2.141217  | C  | 3.950922   | 1.977540  | 3.940982  |
| N | -4.093841 | -1.523110 | -0.867358 | C | 4.164863  | -6.689890 | 0.398803  | C  | 4.740744   | 0.810358  | 4.318832  |
| C | -3.015303 | 0.540686  | -1.361867 | C | 4.280142  | -6.424786 | -1.021700 | C  | 6.032981   | 0.902134  | 3.646264  |
| C | -2.022444 | 1.392048  | -1.835668 | C | 2.278761  | -3.523181 | -4.598775 | C  | 6.042823   | 2.126244  | 2.852163  |
| C | -4.240590 | 2.423160  | -0.544070 | C | 3.985000  | -5.011129 | -3.569198 | C  | 4.118438   | -0.437987 | 4.475594  |
| C | -2.099238 | 2.784830  | -1.623048 | H | 5.070790  | -6.803683 | 0.994296  | C  | 2.681261   | -0.568252 | 4.258670  |
| H | -1.145008 | 0.972017  | -2.311585 | C | 5.424539  | -5.940114 | -1.767554 | C  | 2.437098   | -1.855718 | 3.616162  |
| C | -3.249487 | 3.291745  | -0.966804 | C | 3.595461  | -3.974508 | -4.504440 | C  | 3.723977   | -2.520916 | 3.435020  |
| H | -5.150537 | 2.743775  | -0.047281 | H | 2.063411  | -2.665346 | -5.235588 | C  | 4.763086   | -1.644267 | 3.966310  |
| H | -3.371482 | 4.358273  | -0.806506 | C | 5.284458  | -5.264661 | -2.980811 | C  | 1.442329   | -1.971414 | 2.632669  |
| N | -4.094578 | 1.093403  | -0.740689 | H | 6.415828  | -6.001631 | -1.318487 | C  | 0.650792   | -0.803769 | 2.254578  |
| C | -0.991580 | 3.666399  | -2.025409 | H | 4.366290  | -3.452021 | -5.070948 | C  | 0.417120   | -0.867310 | 0.814740  |
| C | -0.533469 | 4.722289  | -1.115982 | H | 6.171060  | -4.825048 | -3.437640 | C  | 1.063931   | -2.072944 | 0.304019  |
| C | -0.292714 | 3.378675  | -3.215051 | H | -1.278823 | -4.634135 | 0.563620  | C  | 1.696877   | -2.754559 | 1.427523  |
| C | 0.486806  | 5.522298  | -1.629977 | C | 5.797338  | -2.463922 | -0.708334 | C  | 0.885982   | 0.435291  | 2.872632  |
| C | -0.734948 | 4.847822  | 0.316412  | C | 5.164716  | -1.783474 | -1.834272 | C  | 1.920891   | 0.554655  | 3.895391  |
| C | 0.887091  | 4.097373  | -3.618889 | C | 5.811382  | -0.483852 | -1.995767 | C  | 2.568274   | 1.852483  | 3.733108  |
| H | -0.625942 | 2.535027  | -3.818813 | C | 6.844904  | -0.363516 | -0.971982 | C  | 1.932922   | 2.537130  | 2.610414  |
| C | 1.177165  | 5.219962  | -2.843655 | C | 6.835164  | -1.587361 | -0.176183 | C  | 0.892471   | 1.660876  | 2.078653  |
| C | 1.380366  | 6.261968  | -0.797896 | C | 2.971772  | 1.712720  | -2.064883 | Cu | -5.532851  | -0.256039 | -0.063697 |
| H | -1.518893 | 4.273046  | 0.805255  | C | 4.009097  | 2.588551  | -1.533036 | P  | -6.065389  | -0.148190 | 2.214548  |
| C | 0.138901  | 5.572072  | 1.127309  | C | 5.297240  | 1.927156  | -1.718117 | P  | -7.771392  | 0.093814  | -0.603726 |
| C | 1.951833  | 6.680010  | -4.504979 | C | 5.054304  | 0.639720  | -2.363204 | C  | -7.782139  | 0.567092  | 2.169759  |
| C | 2.486371  | 5.775828  | -2.765492 | C | 3.615318  | 0.507773  | -2.578015 | C  | -8.603714  | -0.070686 | 1.045973  |
| C | 1.311691  | 6.232739  | 0.594806  | C | 6.038206  | 2.827299  | 0.471936  | C  | -8.120405  | 1.802875  | -1.157329 |
| C | 2.614051  | 6.416476  | -1.498887 | C | 6.670448  | 2.143280  | 1.596489  | C  | -9.059676  | 2.647234  | -0.554395 |
| H | -0.008572 | 5.534825  | 2.206416  | C | 7.314088  | 0.937022  | 1.086504  | C  | -9.258689  | 3.939017  | -1.038776 |
| H | 1.779283  | 2.827633  | -5.176727 | C | 7.079123  | 0.874527  | -0.353019 | C  | -8.528940  | 4.398380  | -2.131840 |
| C | 3.234982  | 4.206735  | -4.419255 | C | 6.291695  | 2.043074  | -0.733837 | C  | -7.589897  | 3.565370  | -2.738282 |
| C | 3.575386  | 5.227228  | -3.445898 | C | 6.652526  | -0.258046 | 3.156122  | C  | -7.379777  | 2.280755  | -2.248128 |
| C | 2.540385  | 6.593735  | 1.274844  | C | 6.005659  | -1.555965 | 3.319442  | H  | -9.644374  | 2.309511  | 0.295875  |
| C | 3.839809  | 6.544957  | -0.845120 | C | 6.259136  | -2.340718 | 2.114941  | H  | -9.989062  | 4.584908  | -0.560307 |
| H | 4.025383  | 3.768027  | -5.028277 | C | 7.062672  | -1.527430 | 1.207786  | H  | -8.687598  | 5.404695  | -2.508005 |
| C | 4.869701  | 5.557019  | -2.884240 | C | 7.305326  | -0.240174 | 1.851034  | H  | -7.013717  | 3.919597  | -3.587997 |
| C | 3.745771  | 6.740667  | 0.588384  | C | 3.966736  | -3.274302 | 2.276020  | H  | -6.632952  | 1.640833  | -2.712477 |
| H | 2.551283  | 6.642464  | 2.363424  | C | 2.934019  | -3.391640 | 1.252282  | C  | -8.788351  | -0.966540 | -1.691642 |
| C | 4.995203  | 6.185500  | -1.644381 | C | 3.586832  | -3.373454 | -0.052256 | C  | -10.063581 | -0.589833 | -2.129827 |
| H | 5.772446  | 5.209022  | -3.385991 | C | 5.023662  | -3.243757 | 0.164525  | C  | -10.809831 | -1.451332 | -2.927989 |
| H | 4.656880  | 6.899646  | 1.164840  | C | 5.259884  | -3.183434 | 1.602921  | C  | -10.291283 | -2.692976 | -3.294421 |
| H | 5.992310  | 6.305732  | -1.220808 | C | 1.694446  | -2.055752 | -0.948466 | C  | -9.021040  | -3.071665 | -2.867133 |
| C | -0.436323 | -5.122763 | 0.077975  | C | 1.703271  | -0.833239 | -1.745487 | C  | -8.269479  | -2.208570 | -2.073104 |
| C | -0.203846 | -4.910782 | -1.338707 | C | 2.993873  | -0.741985 | -2.422934 | H  | -10.469494 | 0.380411  | -1.855899 |
| C | 0.466294  | -5.821173 | 0.880943  | C | 3.782967  | -1.908493 | -2.040093 | H  | -11.797621 | -1.152875 | -3.266881 |
| C | 0.883333  | -5.613303 | -1.859296 | C | 2.977896  | -2.723846 | -1.134363 | H  | -10.876048 | -3.361762 | -3.919206 |
| C | -0.715411 | -3.847679 | -2.204506 | C | 0.428307  | 0.310600  | 0.052975  | H  | -8.610731  | -4.034010 | -3.158823 |
| C | 1.699342  | -6.365821 | 0.355161  | C | 0.668619  | 1.599129  | 0.693815  | H  | -7.270179  | -2.492874 | -1.751971 |
| H | 0.287206  | -5.848263 | 1.955783  | C | 1.476763  | 2.409106  | -0.213458 | C  | -6.290880  | -1.718877 | 3.128624  |
| C | 1.806860  | -6.326014 | -1.035335 | C | 1.730660  | 1.625553  | -1.417121 | C  | -6.646527  | -2.854640 | 2.388809  |

|   |           |           |          |   |           |          |          |   |           |           |          |
|---|-----------|-----------|----------|---|-----------|----------|----------|---|-----------|-----------|----------|
| C | -6.871324 | -4.072321 | 3.025249 | C | -5.127673 | 0.948693 | 3.329073 | H | -5.398579 | 3.080321  | 5.969165 |
| C | -6.721241 | -4.172361 | 4.406596 | C | -3.748539 | 1.060863 | 3.108890 | H | -6.783185 | 1.616411  | 4.553400 |
| C | -6.351521 | -3.051701 | 5.147884 | C | -2.968138 | 1.880563 | 3.919232 | H | -9.621666 | 0.332361  | 1.024938 |
| C | -6.140286 | -1.829243 | 4.515386 | C | -3.561227 | 2.608363 | 4.948830 | H | -8.706325 | -1.149172 | 1.215401 |
| H | -6.746260 | -2.782513 | 1.307737 | C | -4.933884 | 2.511846 | 5.168960 | H | -7.669433 | 1.645029  | 2.002911 |
| H | -7.153354 | -4.943666 | 2.441465 | C | -5.715540 | 1.684785 | 4.366010 | H | -8.289411 | 0.428937  | 3.130218 |
| H | -6.885889 | -5.123530 | 4.904198 | H | -3.290097 | 0.506844 | 2.293250 |   |           |           |          |
| H | -6.227267 | -3.128190 | 6.224205 | H | -1.899244 | 1.955444 | 3.740350 |   |           |           |          |
| H | -5.852219 | -0.961737 | 5.102158 | H | -2.955147 | 3.253843 | 5.577771 |   |           |           |          |

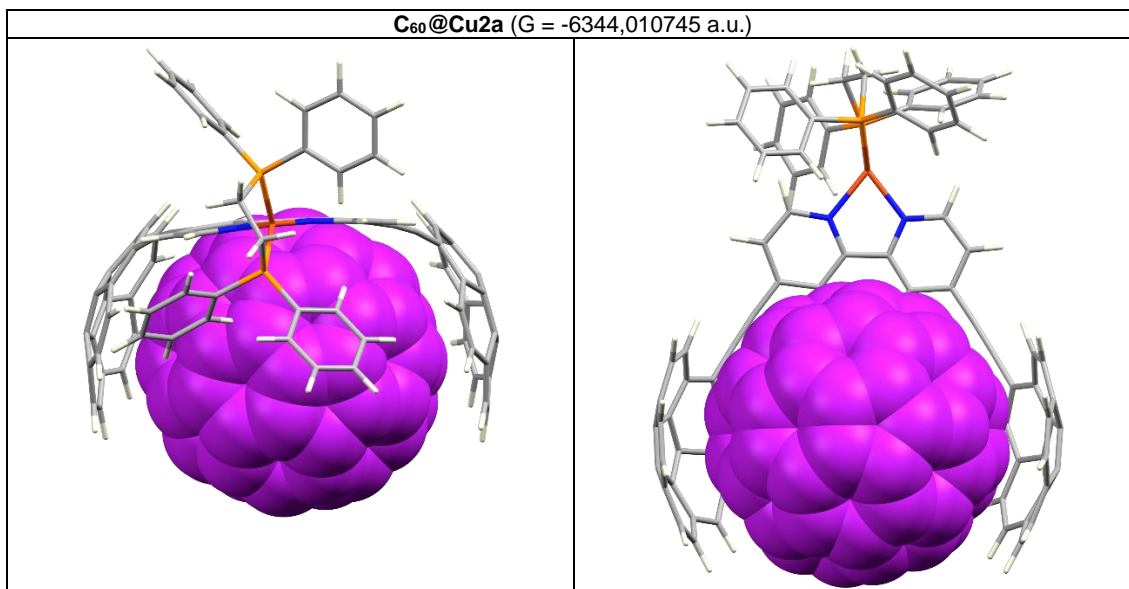

|   |           |           |           |   |          |           |           |   |          |           |           |
|---|-----------|-----------|-----------|---|----------|-----------|-----------|---|----------|-----------|-----------|
| C | -4.920953 | -2.470990 | -0.316695 | H | 7.709611 | 5.018680  | -1.742332 | C | 7.129975 | 0.551760  | 0.068760  |
| C | -3.702227 | -0.623013 | -1.231915 | H | 5.735311 | 6.344835  | 2.630355  | C | 6.591653 | 1.904005  | -0.041382 |
| C | -2.695588 | -1.479645 | -1.656210 | H | 7.531560 | 5.722318  | 0.584568  | C | 6.005014 | -1.371448 | 3.038519  |
| C | -2.777690 | -2.866926 | -1.369624 | C | 0.474485 | -5.911432 | 0.418323  | C | 5.155991 | -2.523969 | 2.752343  |
| C | -3.924182 | -3.355513 | -0.683495 | C | 0.962857 | -5.917825 | -0.944025 | C | 5.472665 | -2.991653 | 1.406475  |
| H | -5.827331 | -2.767991 | 0.199305  | C | 1.288669 | -6.279547 | 1.488121  | C | 6.518757 | -2.131845 | 0.861642  |
| H | -1.824727 | -1.094209 | -2.173047 | C | 2.206069 | -6.514655 | -1.130947 | C | 6.846953 | -1.129267 | 1.870502  |
| H | -4.021164 | -4.410862 | -0.450830 | C | 0.504609 | -5.103169 | -2.074752 | C | 3.071295 | -3.489897 | 1.048358  |
| N | -4.783639 | -1.143577 | -0.592623 | C | 2.669333 | -6.677322 | 1.296630  | C | 2.202038 | -3.137933 | -0.068536 |
| C | -3.716410 | 0.857303  | -1.335854 | H | 0.906497 | -6.150807 | 2.500763  | C | 3.044312 | -2.892930 | -1.233561 |
| C | -2.626897 | 1.584971  | -1.818642 | C | 3.040645 | -6.885218 | -0.032456 | C | 4.431887 | -3.095569 | -0.838801 |
| C | -4.906757 | 2.766641  | -0.826223 | C | 3.051436 | -6.221034 | -2.245352 | C | 4.449704 | -3.463330 | 0.571802  |
| C | -2.678446 | 2.997594  | -1.751592 | C | 1.345891 | -4.828540 | -3.178730 | C | 1.521255 | -1.063928 | -1.919666 |
| H | -1.732150 | 1.101780  | -2.197097 | C | 3.771678 | -6.608038 | 2.235270  | C | 1.832451 | 0.303726  | -2.325243 |
| C | -3.858622 | 3.591663  | -1.249377 | C | 4.397575 | -6.815898 | -0.468817 | C | 3.213915 | 0.329524  | -2.802731 |
| H | -5.826009 | 3.201521  | -0.436632 | C | 2.695309 | -5.316664 | -3.249914 | C | 3.755410 | -1.021848 | -2.691743 |
| H | -3.943060 | 4.673140  | -1.181416 | C | 4.404298 | -6.412115 | -1.837737 | C | 2.710751 | -1.880169 | -2.143896 |
| N | -4.841280 | 1.416874  | -0.844901 | H | 0.990301 | -4.114354 | -3.919867 | C | 0.481889 | 1.143790  | -0.418321 |
| C | 0.707280  | 5.119127  | -2.383756 | H | 3.558676 | -6.496197 | 3.298338  | C | 0.810881 | 2.147953  | 0.590390  |
| C | 1.095024  | 5.932219  | -1.226162 | C | 5.097103 | -6.534901 | 1.808086  | C | 1.861587 | 3.002442  | 0.046650  |
| C | 1.620368  | 4.835138  | -3.423630 | C | 5.449272 | -6.527768 | 0.401975  | C | 2.178455 | 2.530799  | -1.295014 |
| C | 2.358016  | 6.509600  | -1.321558 | C | 3.806198 | -4.759781 | -4.001020 | C | 1.324462 | 1.385058  | -1.587436 |
| C | 0.502804  | 5.952219  | 0.094321  | C | 5.463953 | -5.702356 | -2.406218 | C | 2.883782 | 3.477165  | 0.880051  |
| C | 2.983104  | 5.297514  | -3.393064 | H | 5.876039 | -6.367098 | 2.551899  | C | 2.899106 | 3.116755  | 2.293417  |
| H | 1.309694  | 4.124269  | -4.188153 | C | 6.636810 | -5.991841 | -0.234357 | C | 4.290385 | 2.918237  | 2.691704  |
| C | 3.279502  | 6.198901  | -2.367756 | C | 5.125686 | -4.943569 | -3.595627 | C | 5.131903 | 3.157973  | 1.522961  |
| C | 3.111834  | 6.874952  | -0.165327 | H | 3.600712 | -4.087405 | -4.833454 | C | 4.260616 | 3.504178  | 0.404498  |
| H | -0.506749 | 5.565615  | 0.227631  | C | 6.644462 | -5.599342 | -1.573179 | C | 4.621345 | 1.897678  | 3.596053  |
| C | 1.237324  | 6.320171  | 1.221172  | H | 7.517696 | -5.785220 | 0.373567  | C | 3.575093 | 1.036445  | 4.139291  |
| C | 4.140287  | 4.722121  | -4.055018 | H | 5.913081 | -4.407578 | -4.125304 | C | 4.115640 | -0.314772 | 4.247862  |
| C | 6.400102  | 6.370257  | -1.858666 | H | 7.529765 | -5.098936 | -1.965148 | C | 5.495498 | -0.288718 | 3.772142  |
| C | 2.636346  | 6.687360  | 1.133684  | C | 5.437608 | -2.272673 | -1.365532 | C | 5.808168 | 1.078560  | 3.369086  |
| C | 4.496464  | 6.783258  | -0.496998 | C | 5.093751 | -1.214646 | -2.309476 | C | 3.298887 | -1.422715 | 3.973166  |
| H | 0.774626  | 6.210993  | 2.202133  | C | 5.943837 | -0.063146 | -2.021352 | C | 1.908079 | -1.222634 | 3.576215  |
| H | 3.990181  | 4.050677  | -4.900145 | C | 6.814581 | -0.412281 | -0.902040 | C | 1.577295 | -2.225798 | 2.568897  |
| C | 5.430107  | 4.887334  | -3.552228 | C | 6.502533 | -1.779900 | -0.497883 | C | 2.765330 | -3.044014 | 2.342223  |
| C | 5.689884  | 5.643114  | -2.342051 | C | 3.502929 | 2.555128  | -1.751645 | C | 3.828724 | -2.549314 | 3.210993  |
| C | 3.664223  | 6.611344  | 2.153051  | C | 4.564046 | 3.051895  | -0.885845 | C | 0.738182 | -1.889668 | 1.493492  |
| C | 5.475783  | 6.489071  | 0.452767  | C | 5.752832 | 2.237258  | -1.115573 | C | 0.196564 | -0.537767 | 1.384376  |
| H | 6.245931  | 4.337244  | -4.021281 | C | 5.424446 | 1.236763  | -2.126979 | C | 0.180118 | -0.171500 | -0.029845 |
| C | 6.803430  | 5.531956  | -1.420943 | C | 4.031738 | 1.435117  | -2.521520 | C | 0.713734 | -1.296307 | -0.793745 |
| C | 5.017585  | 6.514894  | 1.827878  | C | 6.274906 | 2.374471  | 1.305321  | C | 1.058394 | -2.356036 | 0.148076  |
| H | 3.370745  | 6.514824  | 3.198394  | C | 6.617293 | 1.311587  | 2.245787  | C | 0.516675 | 0.427196  | 2.352920  |
| C | 6.700975  | 5.934185  | -0.088828 | C | 7.146908 | 0.185956  | 1.482060  | C | 1.388525 | 0.077538  | 3.470209  |

|    |           |           |           |   |            |           |           |   |            |           |           |
|----|-----------|-----------|-----------|---|------------|-----------|-----------|---|------------|-----------|-----------|
| C  | 2.238044  | 1.229121  | 3.757707  | H | -6.191885  | -4.994403 | 4.501909  | H | -9.265167  | 4.741261  | -0.758188 |
| C  | 1.891945  | 2.291735  | 2.818310  | H | -4.360078  | -3.413202 | 3.934968  | H | -10.956345 | 4.796551  | -2.577412 |
| C  | 0.827429  | 1.796316  | 1.949386  | H | -4.876869  | -1.256539 | 2.851763  | H | -11.548740 | 2.706018  | -3.775759 |
| H  | -0.514029 | -5.503618 | 0.625547  | C | -7.106575  | 1.252022  | 3.393158  | H | -10.478885 | 0.570195  | -3.157075 |
| C  | -1.548836 | 3.779054  | -2.102732 | C | -7.623488  | 1.011226  | 4.672184  | C | -8.754889  | -1.333523 | -2.359183 |
| C  | -0.523956 | 4.417583  | -2.316881 | C | -7.497291  | 1.973689  | 5.668678  | C | -7.719358  | -1.611799 | -3.260170 |
| C  | -1.714227 | -3.723316 | -1.712819 | C | -6.854686  | 3.181730  | 5.398110  | C | -7.902822  | -2.541572 | -4.280019 |
| C  | -0.705448 | -4.385991 | -1.941463 | C | -6.333894  | 3.425755  | 4.130052  | C | -9.118284  | -3.211485 | -4.400632 |
| Cu | -6.319720 | 0.168605  | -0.096369 | C | -6.455665  | 2.461804  | 3.131481  | C | -10.150964 | -2.948990 | -3.502299 |
| P  | -8.429751 | -0.099996 | -1.057510 | H | -8.116622  | 0.067867  | 4.891688  | C | -9.973587  | -2.013376 | -2.486513 |
| P  | -7.284604 | 0.044708  | 2.031954  | H | -7.898929  | 1.780721  | 6.659150  | H | -6.765611  | -1.100589 | -3.153489 |
| C  | -9.462825 | -0.659644 | 0.384119  | H | -6.755838  | 3.929885  | 6.179169  | H | -7.094057  | -2.748509 | -4.974556 |
| C  | -9.099245 | 0.111704  | 1.655283  | H | -5.826131  | 4.362325  | 3.919120  | H | -9.260286  | -3.941769 | -5.191848 |
| C  | -7.012217 | -1.579164 | 2.832670  | H | -6.037522  | 2.642867  | 2.144626  | H | -11.098109 | -3.472654 | -3.592485 |
| C  | -8.036723 | -2.476203 | 3.154273  | C | -9.260564  | 1.438711  | -1.601033 | H | -10.789074 | -1.815626 | -1.796811 |
| C  | -7.739281 | -3.701226 | 3.749865  | C | -8.918820  | 2.627565  | -0.941721 | H | -9.693920  | -0.231842 | 2.508652  |
| C  | -6.420031 | -4.040426 | 4.035868  | C | -9.534244  | 3.828724  | -1.282127 | H | -9.331183  | 1.176055  | 1.530958  |
| C  | -5.392037 | -3.153688 | 3.717674  | C | -10.482489 | 3.858874  | -2.302410 | H | -9.264324  | -1.730729 | 0.507279  |
| C  | -5.684750 | -1.936971 | 3.111355  | C | -10.815171 | 2.684940  | -2.975015 | H | -10.529413 | -0.540768 | 0.167568  |
| H  | -9.074229 | -2.232301 | 2.947502  | C | -10.211837 | 1.479104  | -2.625990 |   |            |           |           |
| H  | -8.544284 | -4.388460 | 3.993118  | H | -8.163878  | 2.610524  | -0.157995 |   |            |           |           |

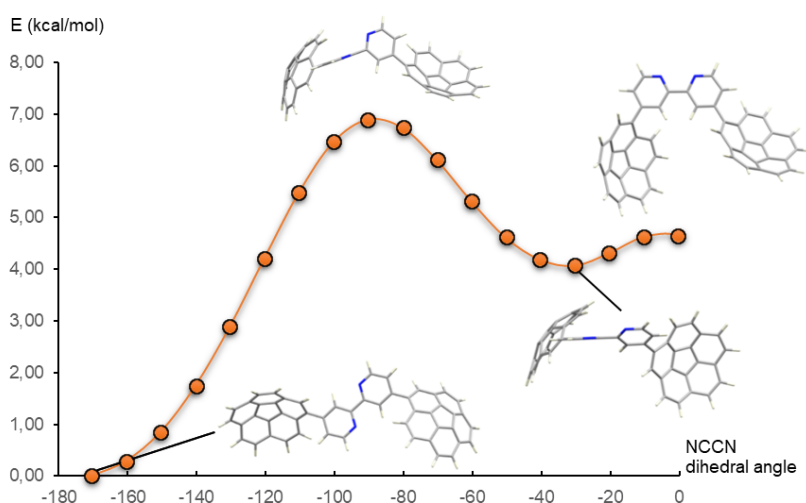

**Figure S 102.** Plot of electronic energy (in kcal/mol) vs NCCN dihedral angle for compound **L1a** showing that a bent arrangement is more stable than the canonical syn conformation.<sup>31,32</sup>

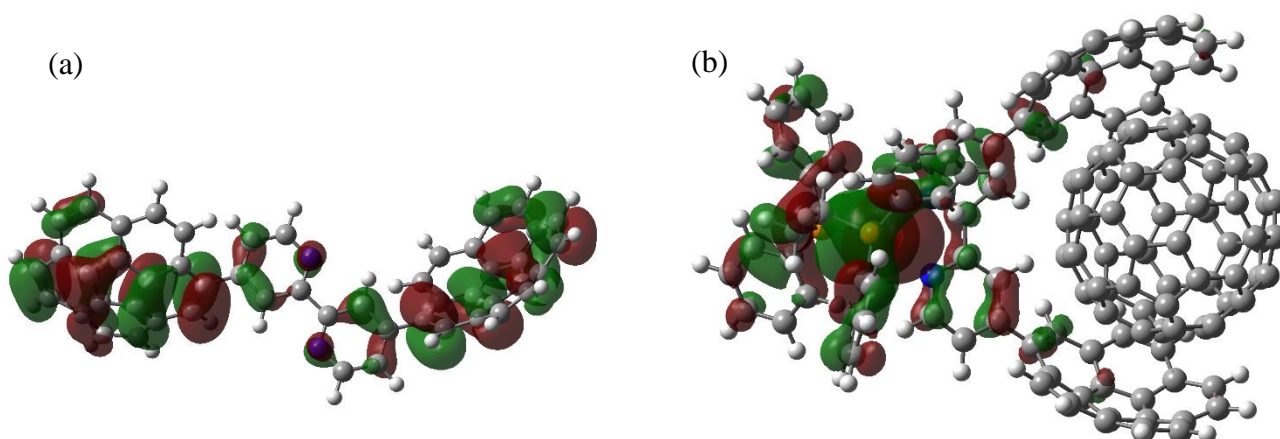

**Figure S 103.** HOMO surface of compound **L1a** (a) and assembly **C<sub>60</sub>@Cu1a** (b) represented with isovalues of 0.015 e/Å<sup>3</sup>.

Electronic interaction energies for assemblies **C<sub>60</sub>@Cu1a** and **C<sub>60</sub>@Cu2a**, are - 42.7 kcal/mol and - 43.3 kcal/mol, respectively. They fall within the expected range for a molecular pincer bearing two substituted corannulene groups,<sup>33,34</sup> albeit slightly higher. The almost negligible difference of 0.6 kcal/mol suggests a good performance of the cavity regardless the small difference in size (1.4 Å). NCI plots corroborate this feature due to the fact that attractive interaction surfaces are similar as shown in Figures S103-S106.

Additionally, the average H<sup>3</sup>(bpy)-C(C<sub>60</sub>) were 2.7 Å and 2.9 Å for supramolecular adducts **C<sub>60</sub>@Cu1a** and **C<sub>60</sub>@Cu2a**, respectively suggesting that the way that the host and guest interact is almost the same in both systems, and, therefore, the fullerene is close to the bpy moiety regardless of the presence or absence of the ethylene moiety.

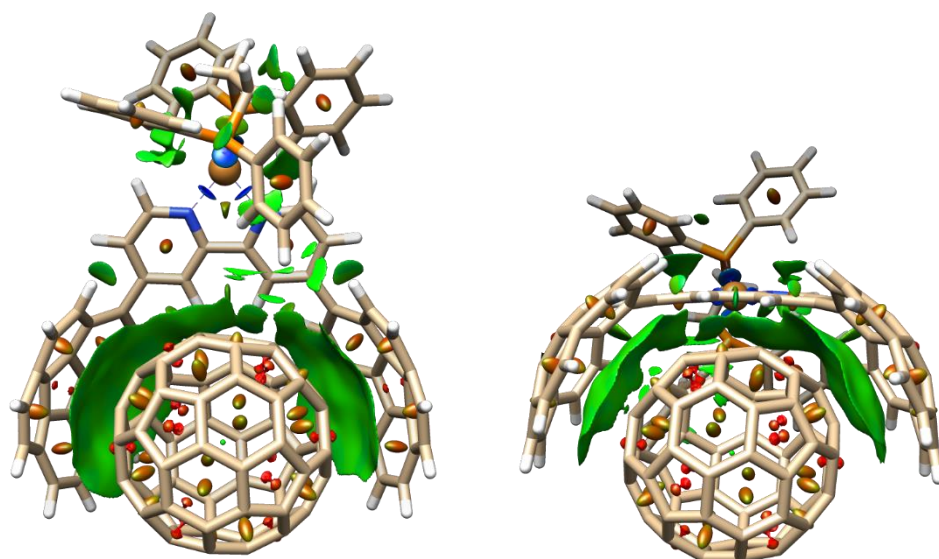

**Figure S 104.** Non-covalent interactions represented as gradient isosurfaces for supramolecular assembly  $C_{60}@Cu1a$ .

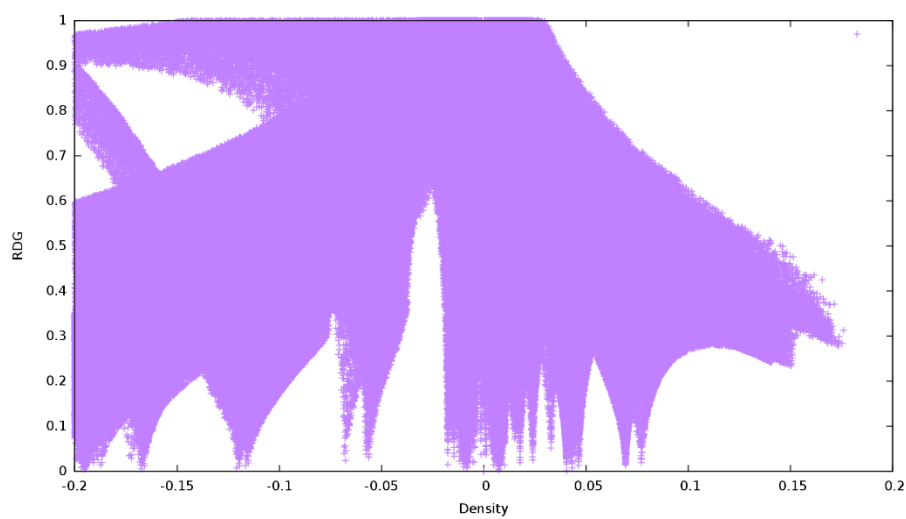

**Figure S 105.** Plot of the reduced density gradient versus the electron density for supramolecular assembly  $C_{60}@Cu1a$ .

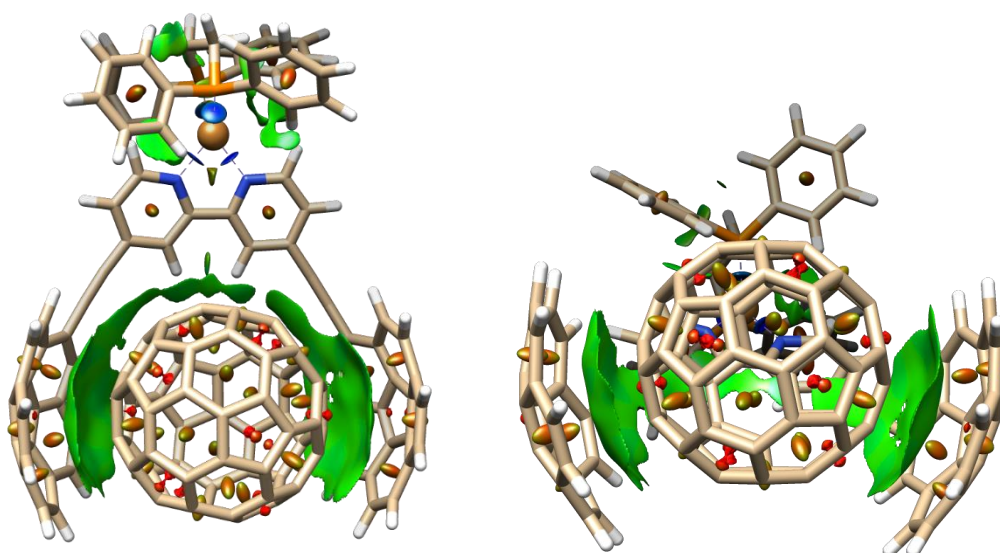

**Figure S 106.** Non-covalent interactions represented as gradient isosurfaces for supramolecular assembly  $C_{60}@Cu_2a$ .

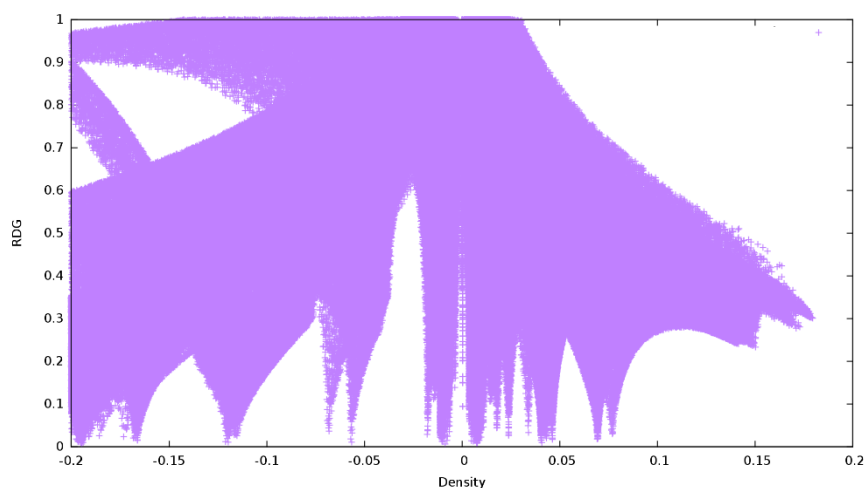

**Figure S 107.** Plot of the reduced density gradient versus the electron density for supramolecular assembly  $C_{60}@Cu_2a$ .

## References

- 1 D. B. G. Williams and M. Lawton, *J. Org. Chem.*, 2010, **75**, 8351–8354.
- 2 W. L. F. Armarego and C. L. L. Chai, *Purification of Laboratory Chemicals*, Butterworth-Heinemann, 2012.
- 3 M. Beinhoff, W. Weigel, M. Jurczok, W. Rettig, C. Modrakowski, I. Brüdgam, H. Hartl and A. D. Schlüter, *Eur. J. Org. Chem.*, 2001, **2001**, 3819–3829.
- 4 S. Da Ros, A. Linden, K. K. Baldridge and J. S. Siegel, *Org. Chem. Front.*, 2015, **2**, 626–633.
- 5 C. S. Jones, E. Elliott and J. S. Siegel, *Synlett*, 2004, **2004**, 187–191.
- 6 M. Ruthkosky, C. A. Kelly, F. N. Castellano and G. J. Meyer, *Coord. Chem. Rev.*, 1998, **171**, 309–322.
- 7 J. Lopes, D. Alves, T. S. Morais, P. J. Costa, M. F. M. Piedade, F. Marques, M. J. Villa de Brito and M. Helena Garcia, *J. Inorg. Biochem.*, 2017, **169**, 68–78.
- 8 H. Takeda, Y. Monma, H. Sugiyama, H. Uekusa and O. Ishitani, *Front. Chem.*, 2019, **7**, 1–12.
- 9 S. Grimme, *J. Comput. Chem.*, 2006, **27**, 1787–1799.
- 10 S. Grimme, J. Antony, S. Ehrlich and H. Krieg, *J. Chem. Phys.*, 2010, **132**, 154104.
- 11 S. Grimme, S. Ehrlich and L. Goerigk, *J. Comput. Chem.*, 2011, **32**, 1456–1465.
- 12 R. Ditchfield, W. J. Hehre and J. A. Pople, *J. Chem. Phys.*, 1971, **54**, 724–728.
- 13 W. J. Hehre, K. Ditchfield and J. A. Pople, *J. Chem. Phys.*, 1972, **56**, 2257–2261.
- 14 M. M. Francl, W. J. Pietro, W. J. Hehre, J. S. Binkley, M. S. Gordon, D. J. DeFrees and J. A. Pople, *J. Chem. Phys.*, 1982, **77**, 3654–3665.
- 15 M. J. Frisch, J. A. Pople and J. S. Binkley, *J. Chem. Phys.*, 1984, **80**, 3265–3269.
- 16 M. Ernzerhof and G. E. Scuseria, *J. Chem. Phys.*, 1999, **110**, 5029–5036.
- 17 C. Adamo and V. Barone, *J. Chem. Phys.*, 1999, **110**, 6158–6170.
- 18 W. R. Wadt and P. J. Hay, *J. Chem. Phys.*, 1985, **82**, 284–298.

- 19 P. J. Hay and W. R. Wadt, *J. Chem. Phys.*, 1985, **82**, 299–310.
- 20 P. J. Hay and W. R. Wadt, *J. Chem. Phys.*, 1985, **82**, 270–283.
- 21 J. Tomasi, B. Mennucci and R. Cammi, *Chem. Rev.*, 2005, **105**, 2999–3093.
- 22 S. F. Boys and F. Bernardi, *Mol. Phys.*, 1970, **19**, 553–566.
- 23 F. B. van Duijneveldt, J. G. C. M. van D. van de Rijdt and J. H. van Lenthe, *Chem. Rev.*, 1994, **94**, 1873–1885.
- 24 J. P. Bowen, J. B. Sorensen and K. N. Kirschner, *J. Chem. Educ.*, 2007, **84**, 1225–1229.
- 25 F. Jensen, *J. Chem. Theory Comput.*, 2010, **6**, 100–106.
- 26 *Gaussian 16, Revision C.01*, M. J. Frisch, G. W. Trucks, H. B. Schlegel, G. E. Scuseria, M. A. Robb, J. R. Cheeseman, G. Scalmani, V. Barone, G. A. Petersson, H. Nakatsuji, X. Li, M. Caricato, A. V. Marenich, J. Bloino, B. G. Janesko, R. Gomperts, B. Mennucci, H. P. Hratchian, J. V. Ortiz, A. F. Izmaylov, J. L. Sonnenberg, D. Williams-Young, F. Ding, F. Lipparini, F. Egidi, J. Goings, B. Peng, A. Petrone, T. Henderson, D. Ranasinghe, V. G. Zakrzewski, J. Gao, N. Rega, G. Zheng, W. Liang, M. Hada, M. Ehara, K. Toyota, R. Fukuda, J. Hasegawa, M. Ishida, T. Nakajima, Y. Honda, O. Kitao, H. Nakai, T. Vreven, K. Throssell, J. A. Montgomery, Jr., J. E. Peralta, F. Ogliaro, M. J. Bearpark, J. J. Heyd, E. N. Brothers, K. N. Kudin, V. N. Staroverov, T. A. Keith, R. Kobayashi, J. Normand, K. Raghavachari, A. P. Rendell, J. C. Burant, S. S. Iyengar, J. Tomasi, M. Cossi, J. M. Millam, M. Klene, C. Adamo, R. Cammi, J. W. Ochterski, R. L. Martin, K. Morokuma, O. Farkas, J. B. Foresman, and D. J. Fox, *Gaussian, Inc., Wallingford CT*, 2016.
- 27 E. R. Johnson, S. Keinan, P. Mori-Sánchez, J. Contreras-García, A. J. Cohen and W. Yang, *J. Am. Chem. Soc.*, 2010, **132**, 6498–6506.
- 28 J. Contreras-García, E. R. Johnson, S. Keinan, R. Chaudret, J. P. Piquemal, D. N. Beratan and W. Yang, *J. Chem. Theory Comput.*, 2011, **7**, 625–632.
- 29 E. F. Pettersen, T. D. Goddard, C. C. Huang, G. S. Couch, D. M. Greenblatt, E. C. Meng and T. E. Ferrin, *J. Comput. Chem.*, 2004, **25**, 1605–1612.
- 30 *Rodríguez-Guerra Pedregal, Jaime, autor.; Maréchal, Jean-Didier, supervisor acadèmic.; Cairó Badillo, Jordi Joan, supervisor acadèmic. Development and application of a computational platform for complex molecular design. 1 recurs en línia (167 pàgines). ISBN 9788449082382. <<https://ddd.uab.cat/record/201498>> [Consulta: 29 juliol 2020].*
- 31 S. T. Howard, *J. Am. Chem. Soc.*, 1996, **118**, 10269–10274.
- 32 S. Zahn, W. Reckien, B. Kirchner, H. Staats, J. Matthey and A. Lützen, *Chem. - Eur. J.*, 2009, **15**, 2572–2580.
- 33 C. Mück-Lichtenfeld, S. Grimme, L. Kobryn and A. Sygula, *Phys. Chem. Chem. Phys.*, 2010, **12**, 7091–7097.
- 34 D. Josa, J. Rodríguez-Otero, E. M. Cabaleiro-Lago, L. A. Santos and T. C. Ramalho, *J. Phys. Chem. A*, 2014, **118**, 9521–9528.
